# Supplementary material for: Amplifying recombination genome-wide and reshaping crossover landscapes in Brassicas
Source: PubMed Central journal article supplement (PMC5444851; doi:10.1371/journal.pgen.1006794), 2017-05-11

# ArAr' (f) - ArAr'Co (f) chr 1

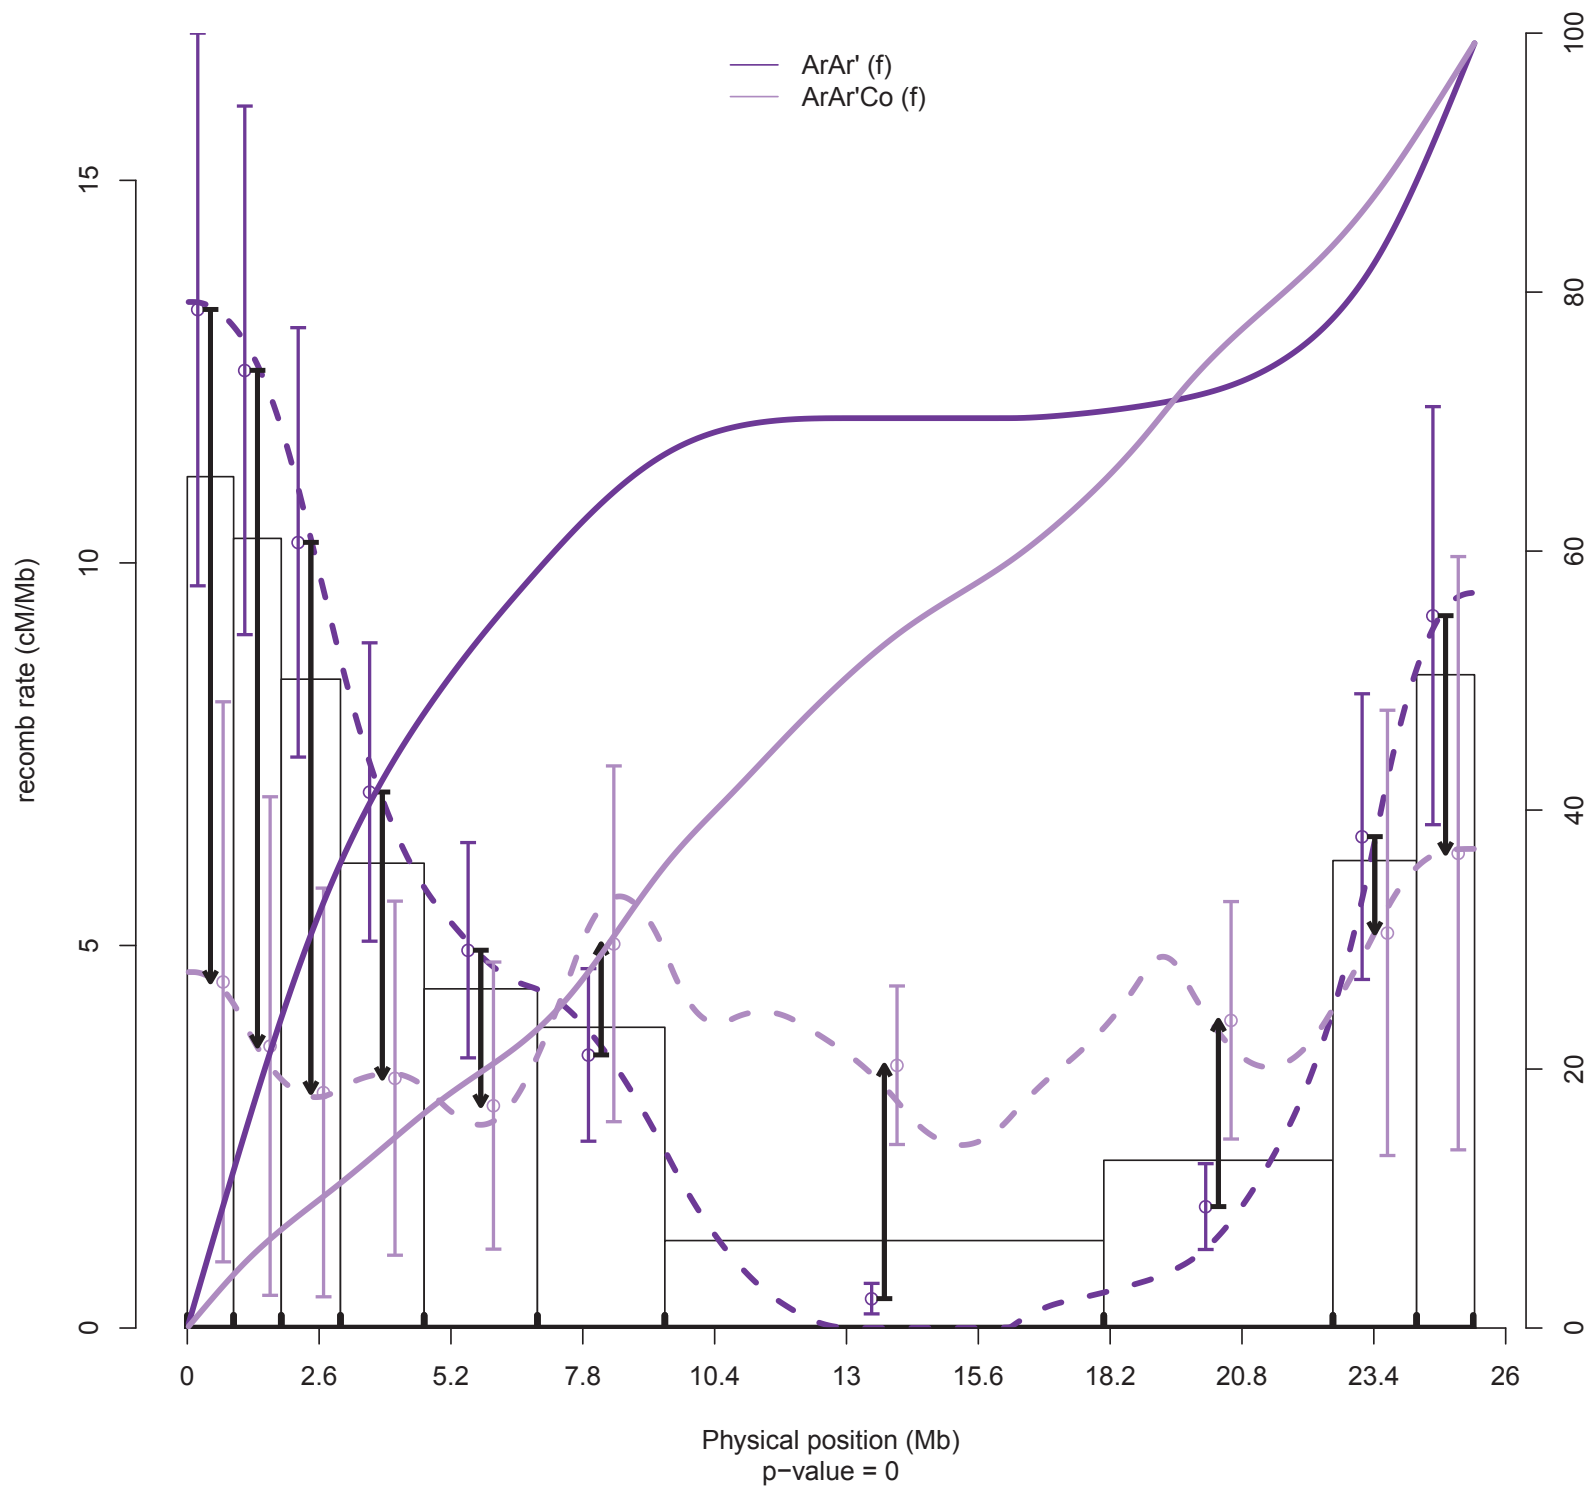

### ArAr' (f) - ArAr'Co (f) chr 2

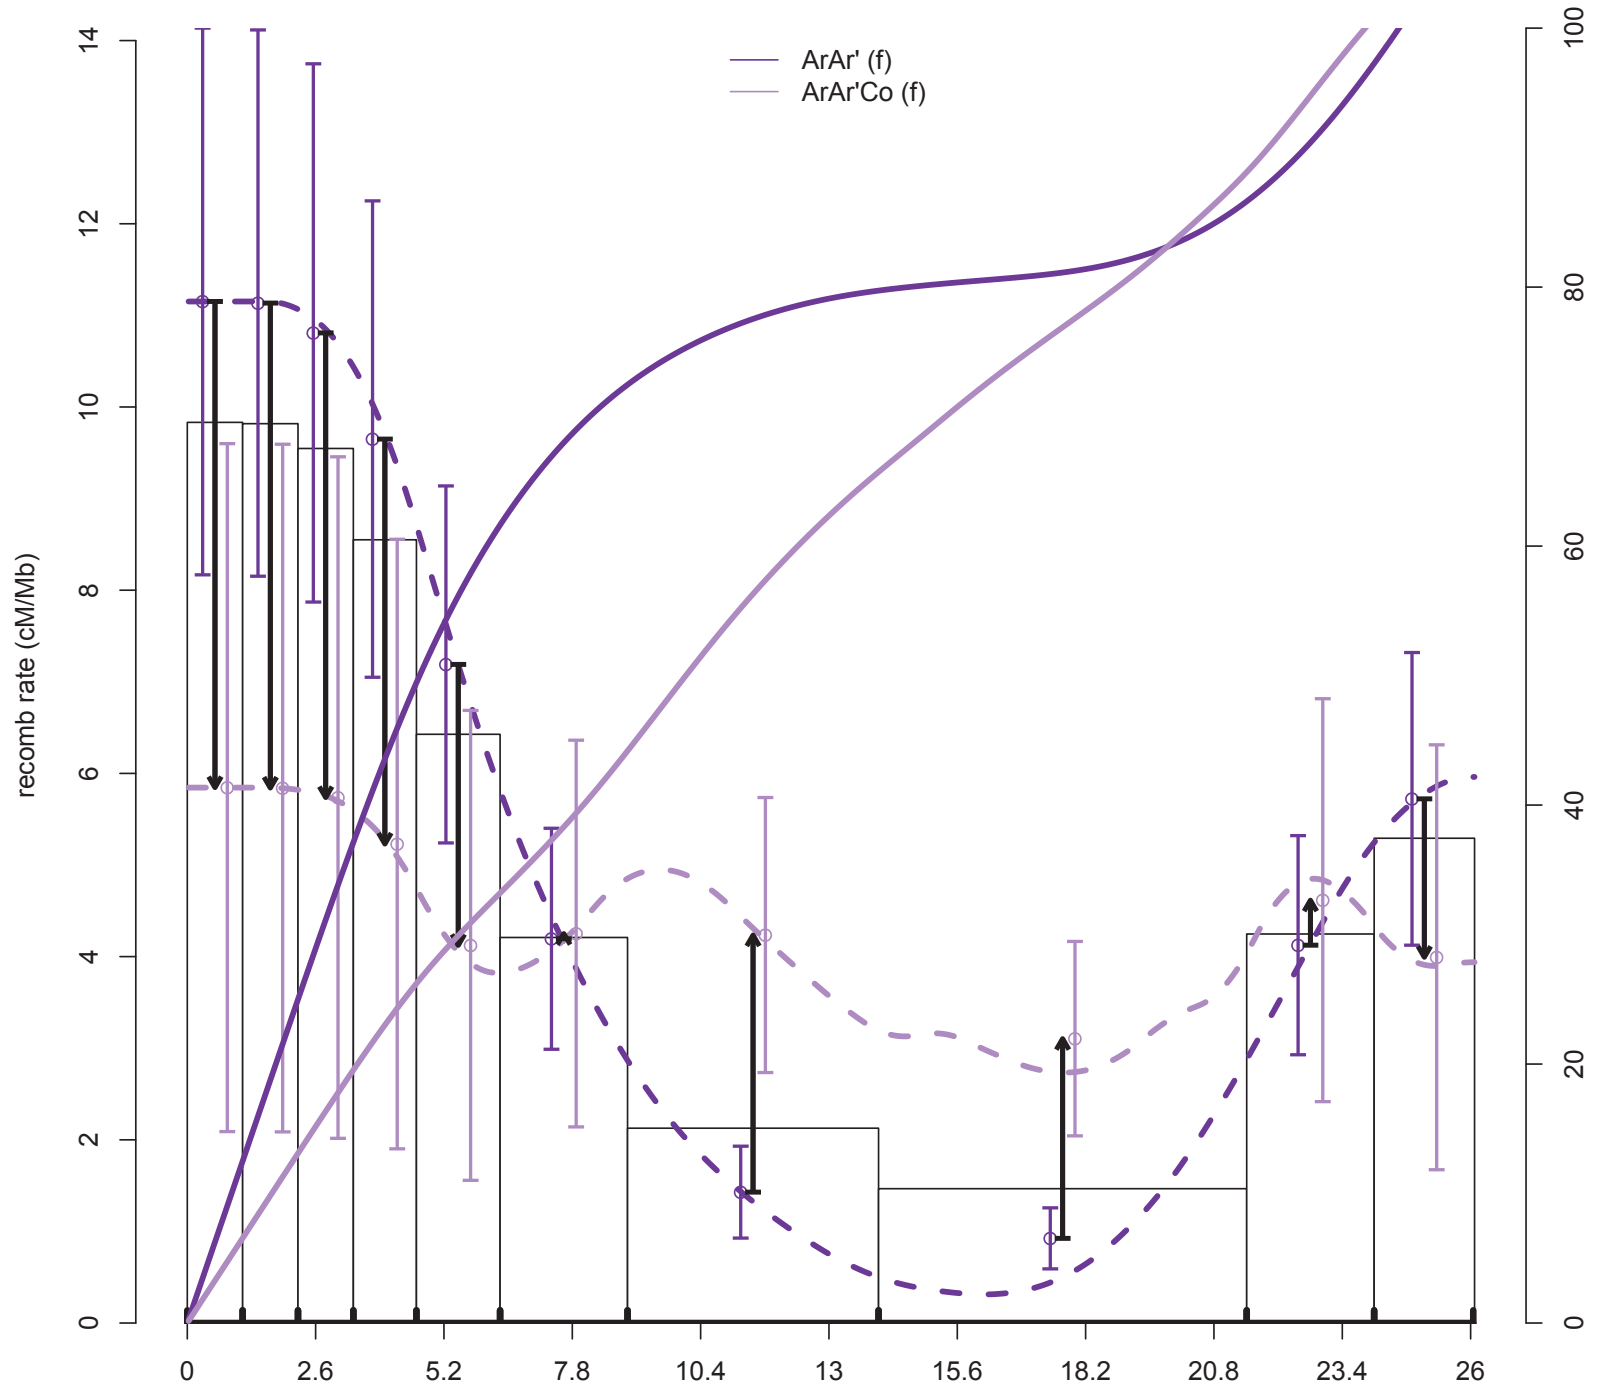

Physical position (Mb)  
p-value = 9.37932509437189e-10

### ArAr' (f) – ArAr'Co (f) chr 3

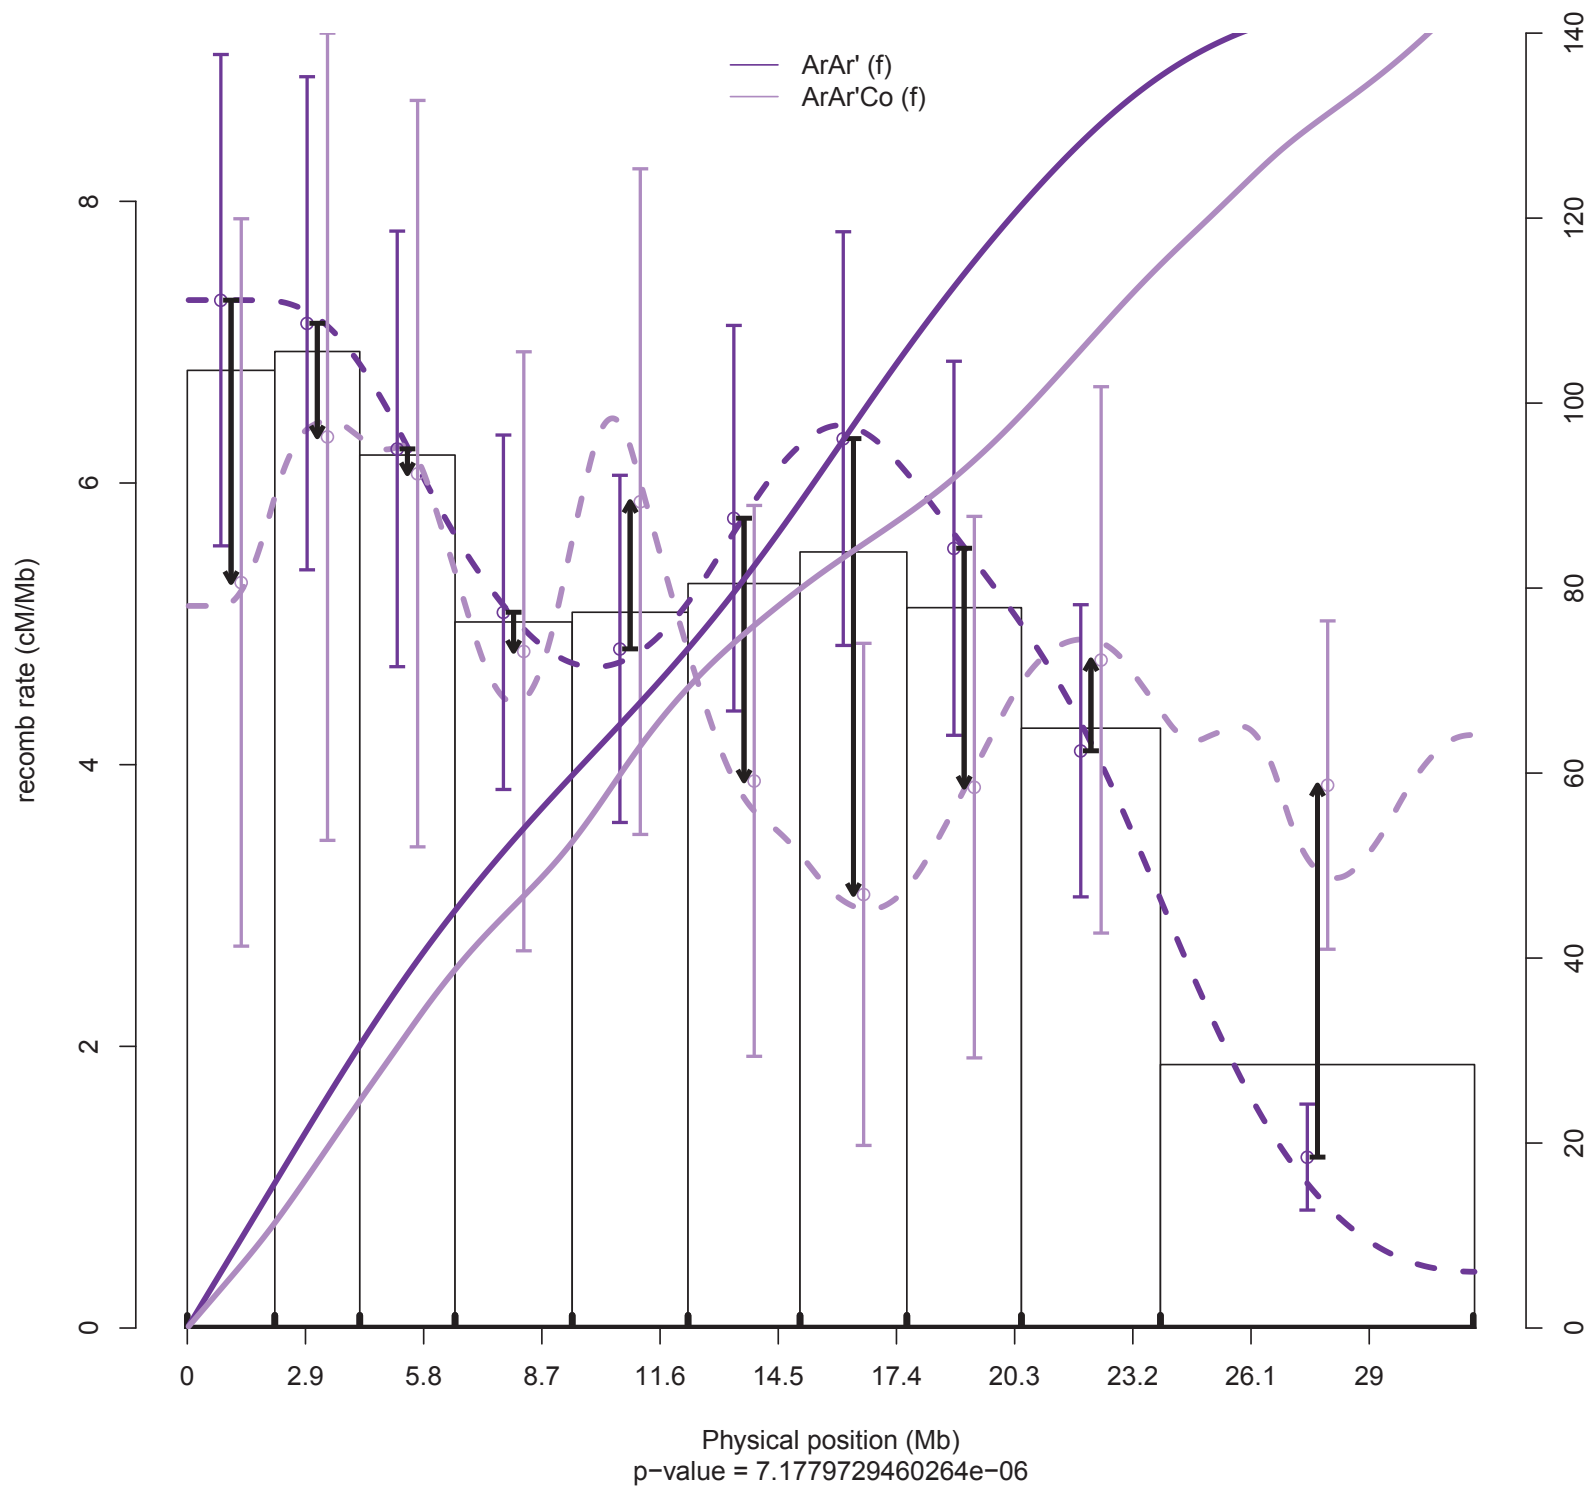

# ArAr' (f) - ArAr'Co (f) chr 4

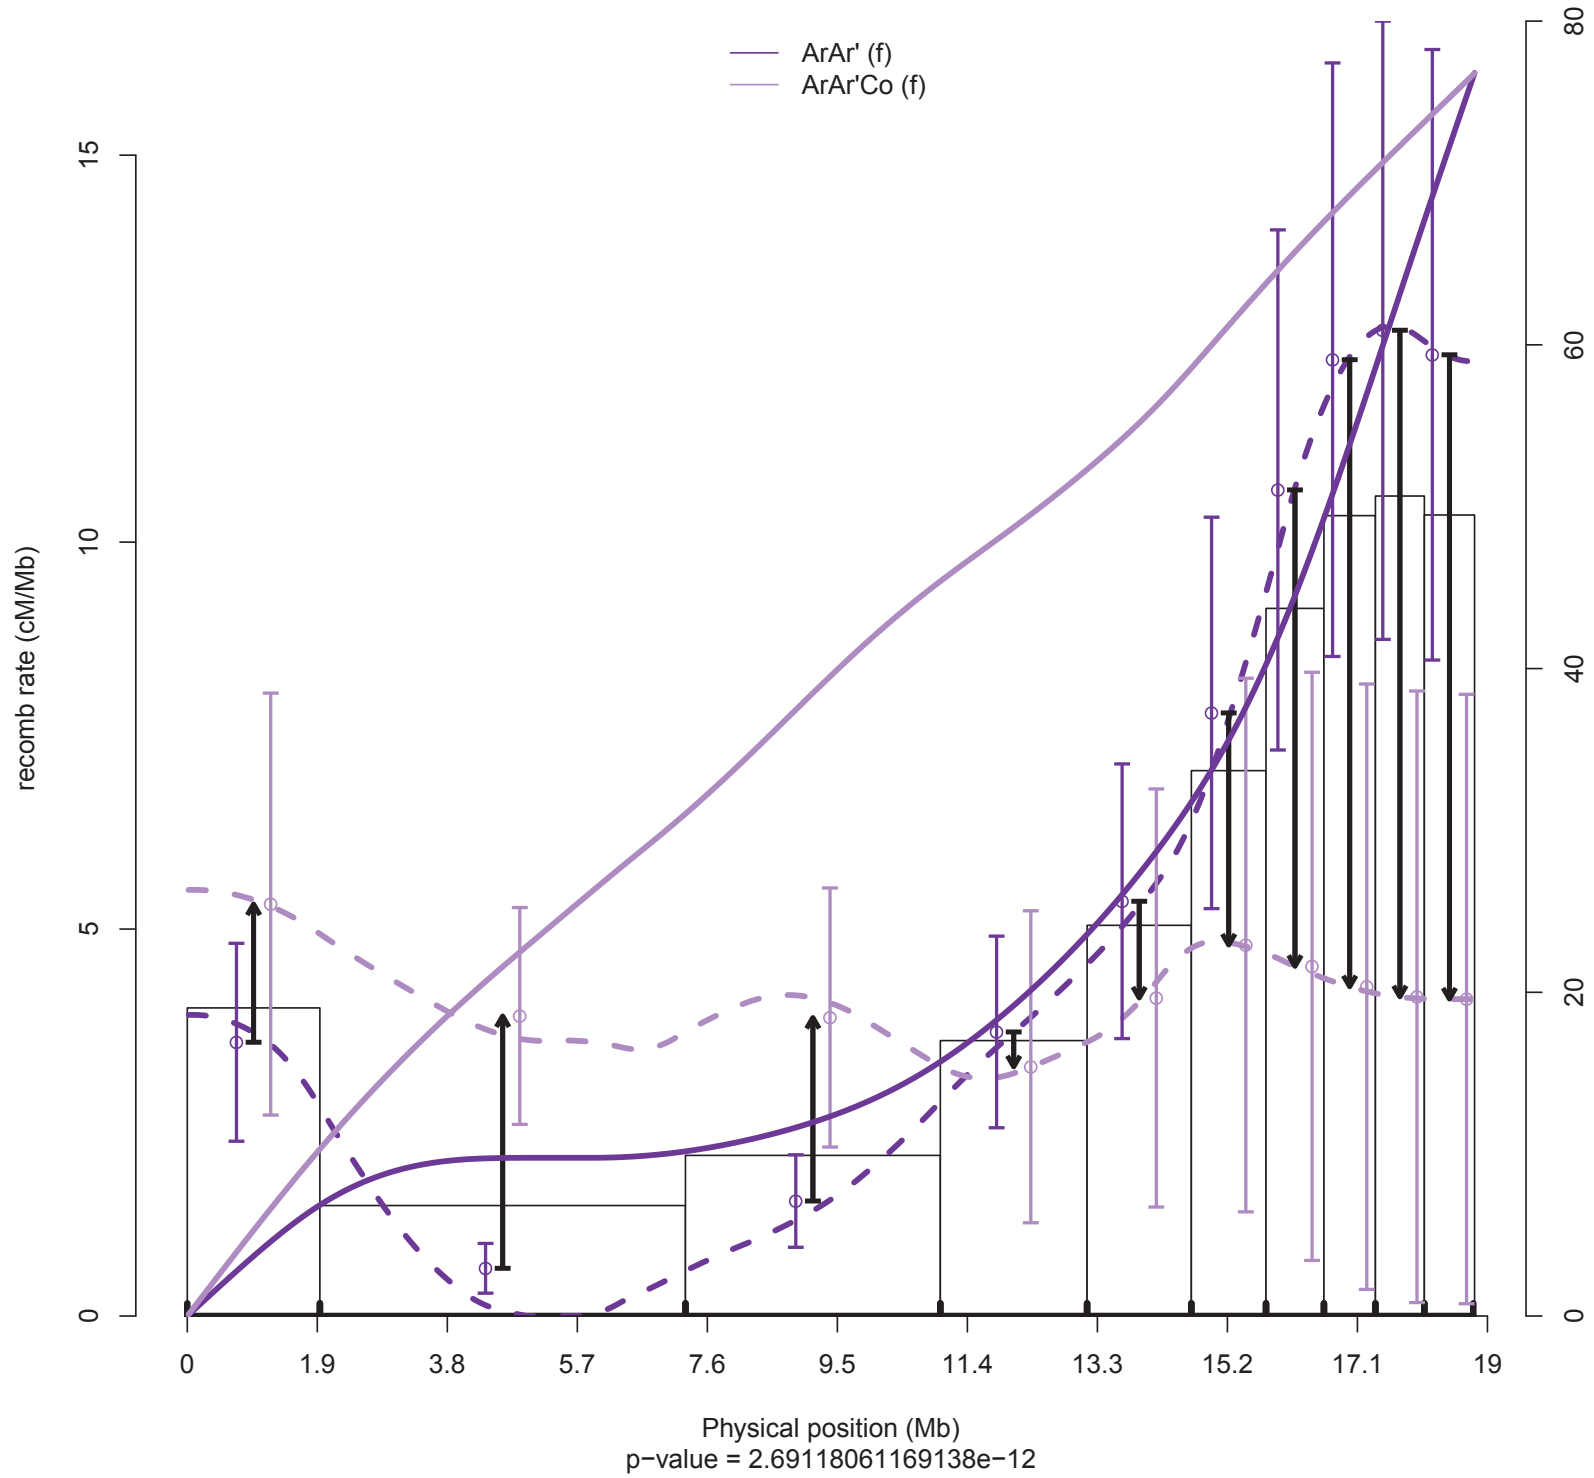

# ArAr' (f) - ArAr'Co (f) chr 5

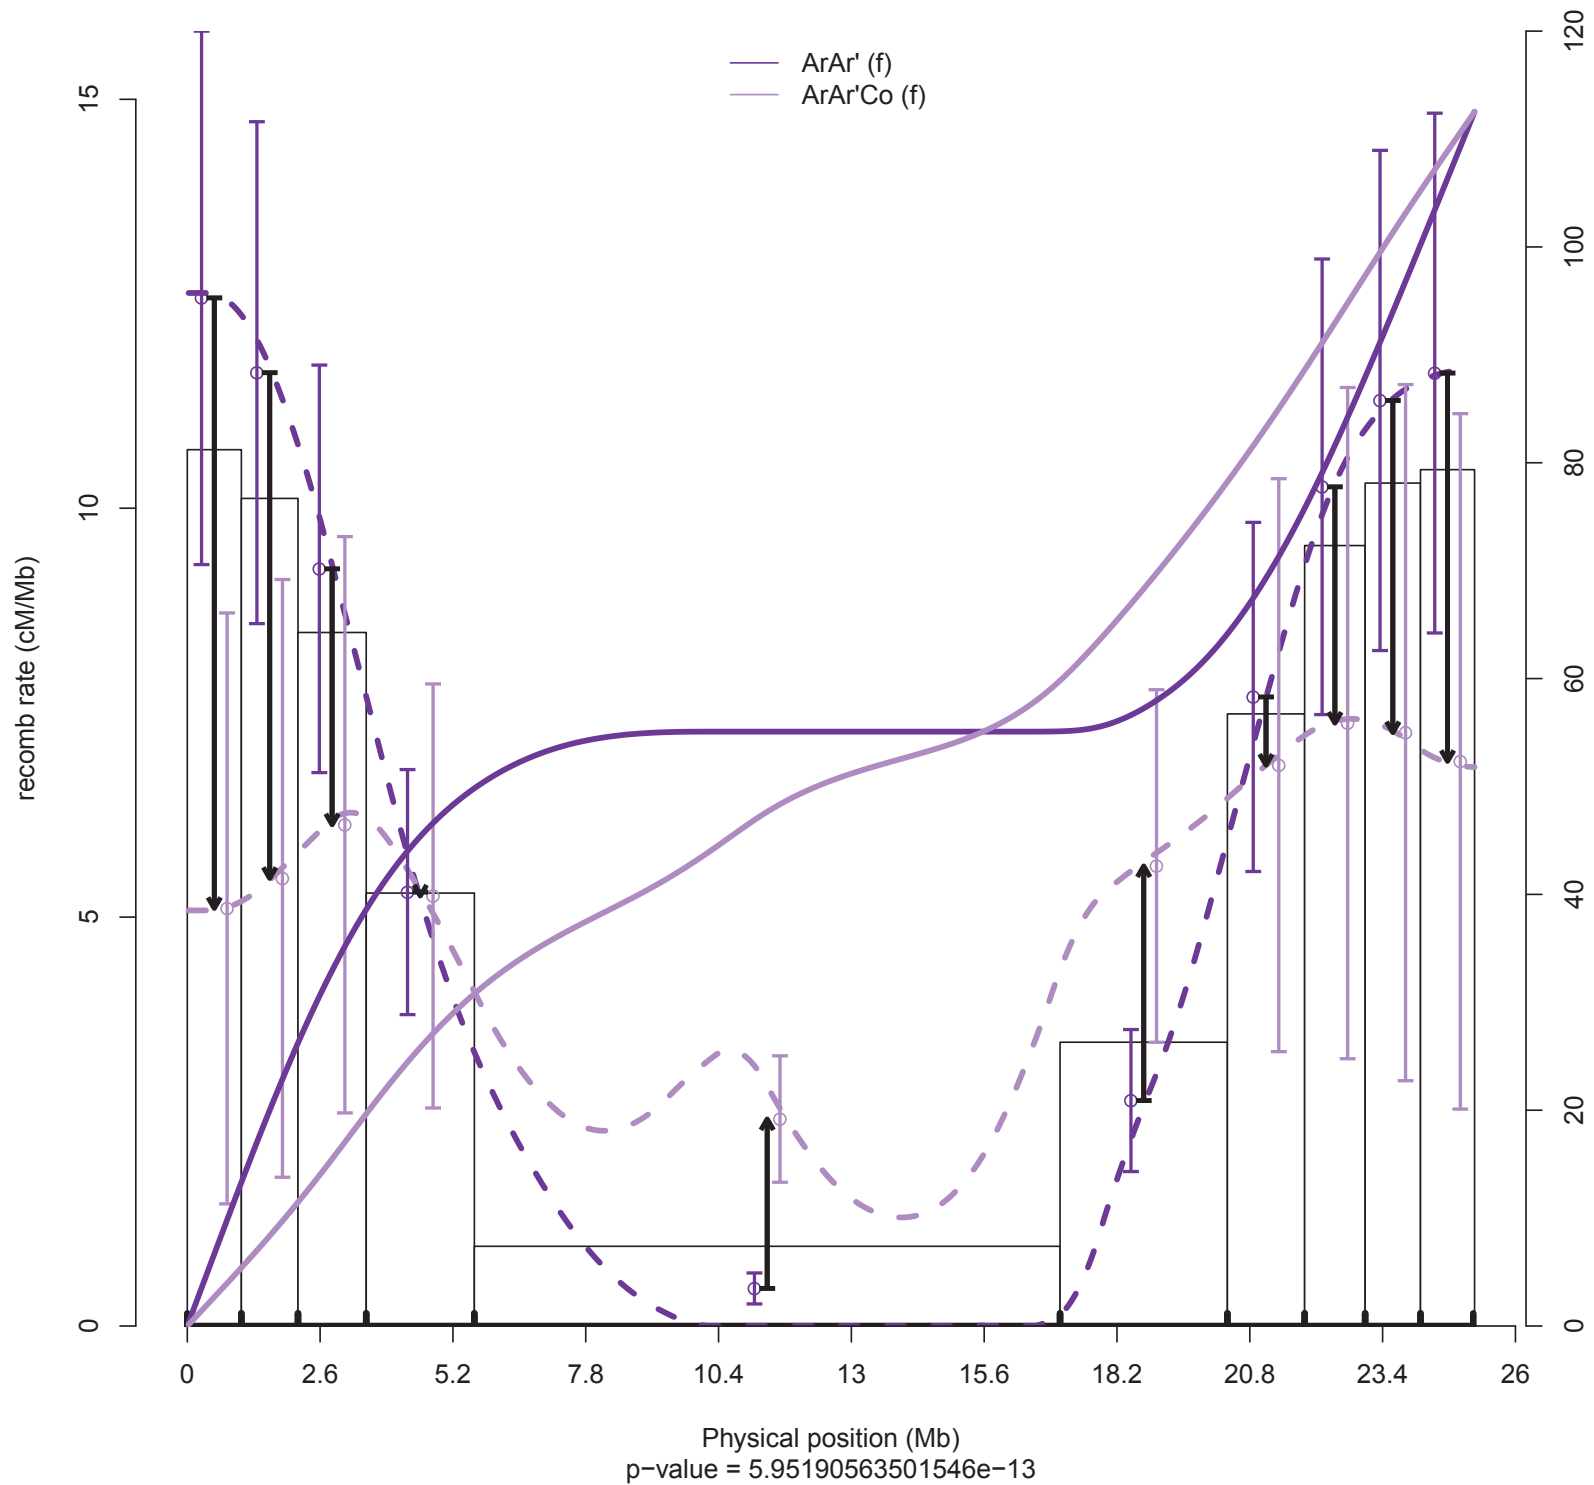

# ArAr' (f) - ArAr'Co (f) chr 6

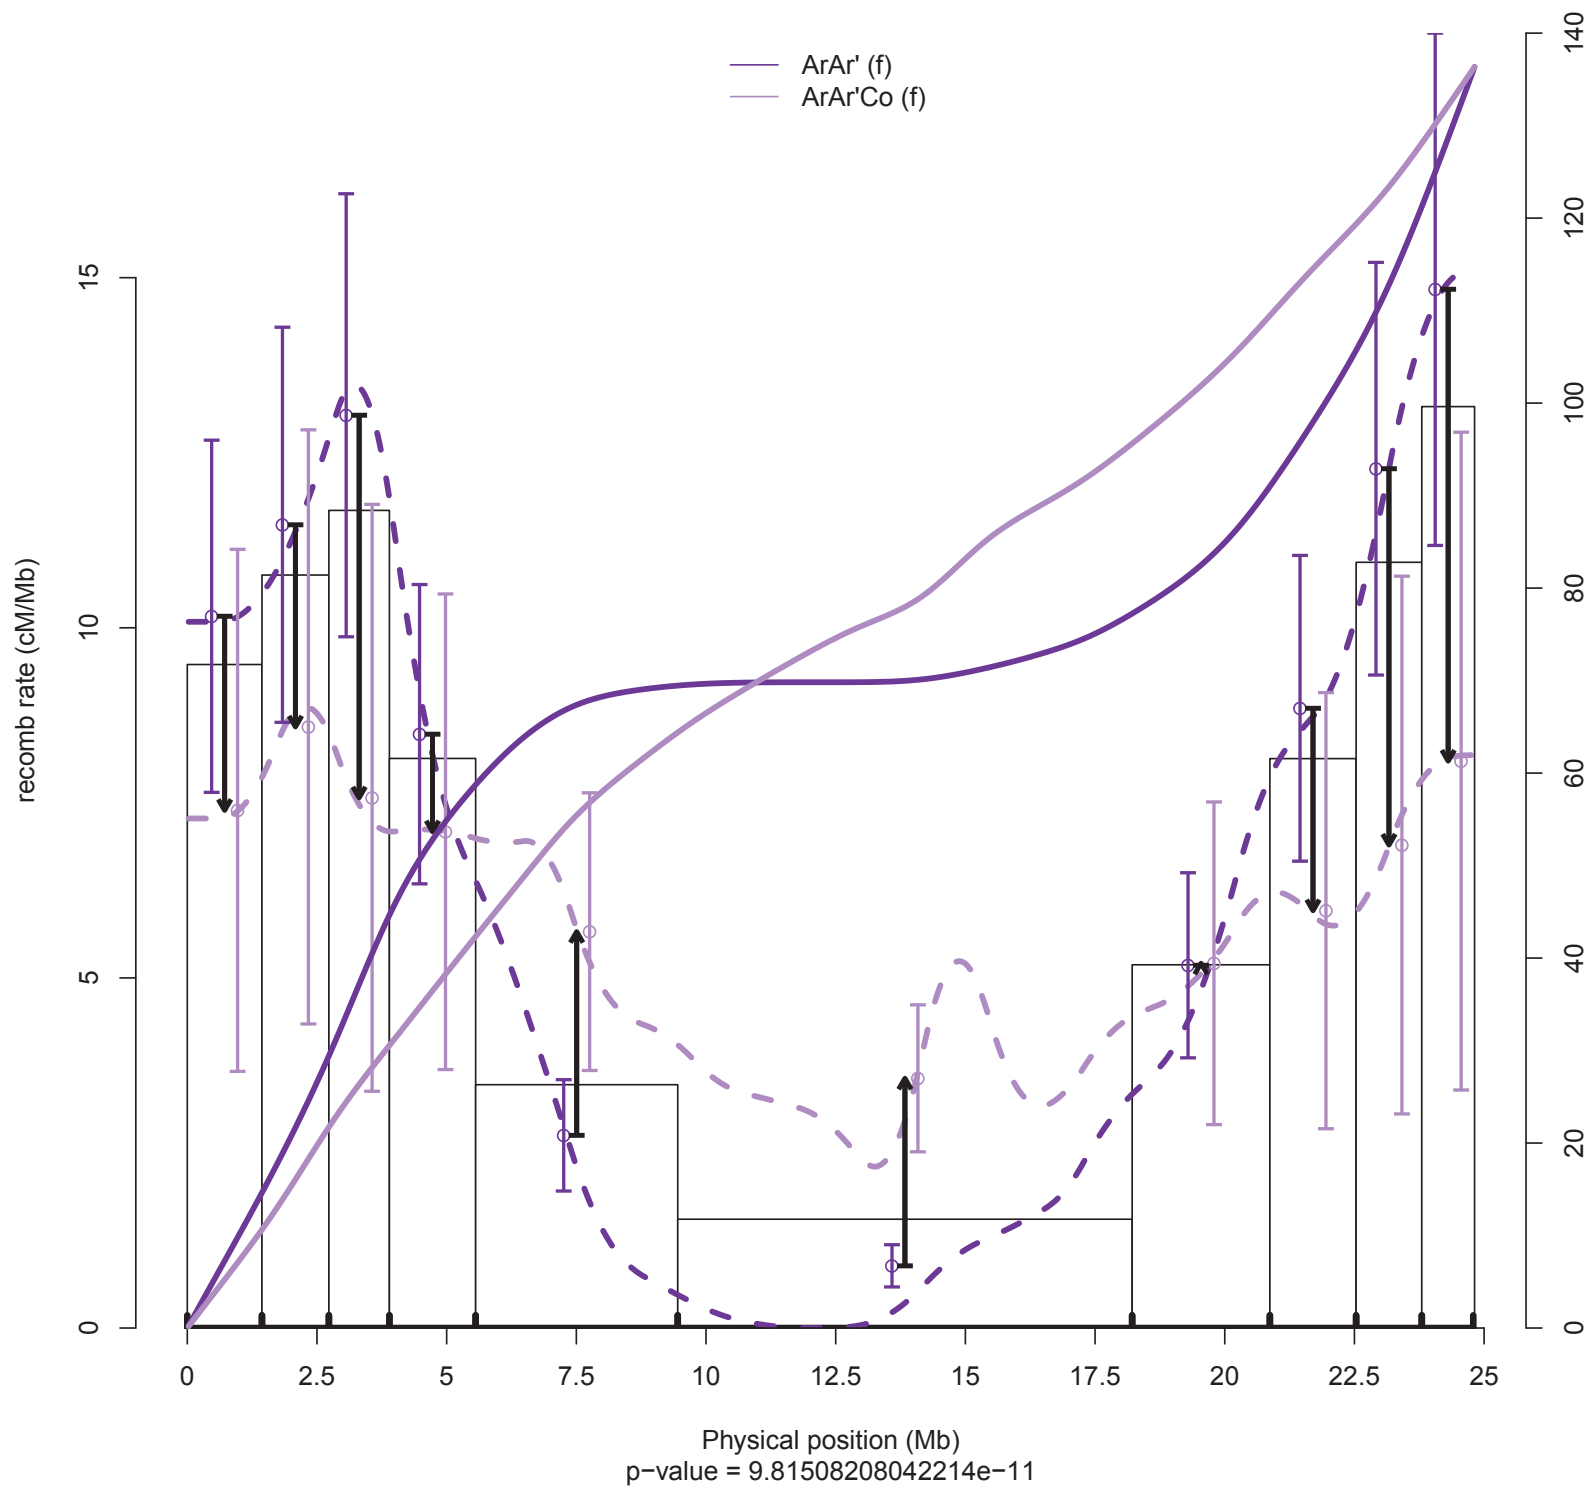

# ArAr' (f) - ArAr'Co (f) chr 7

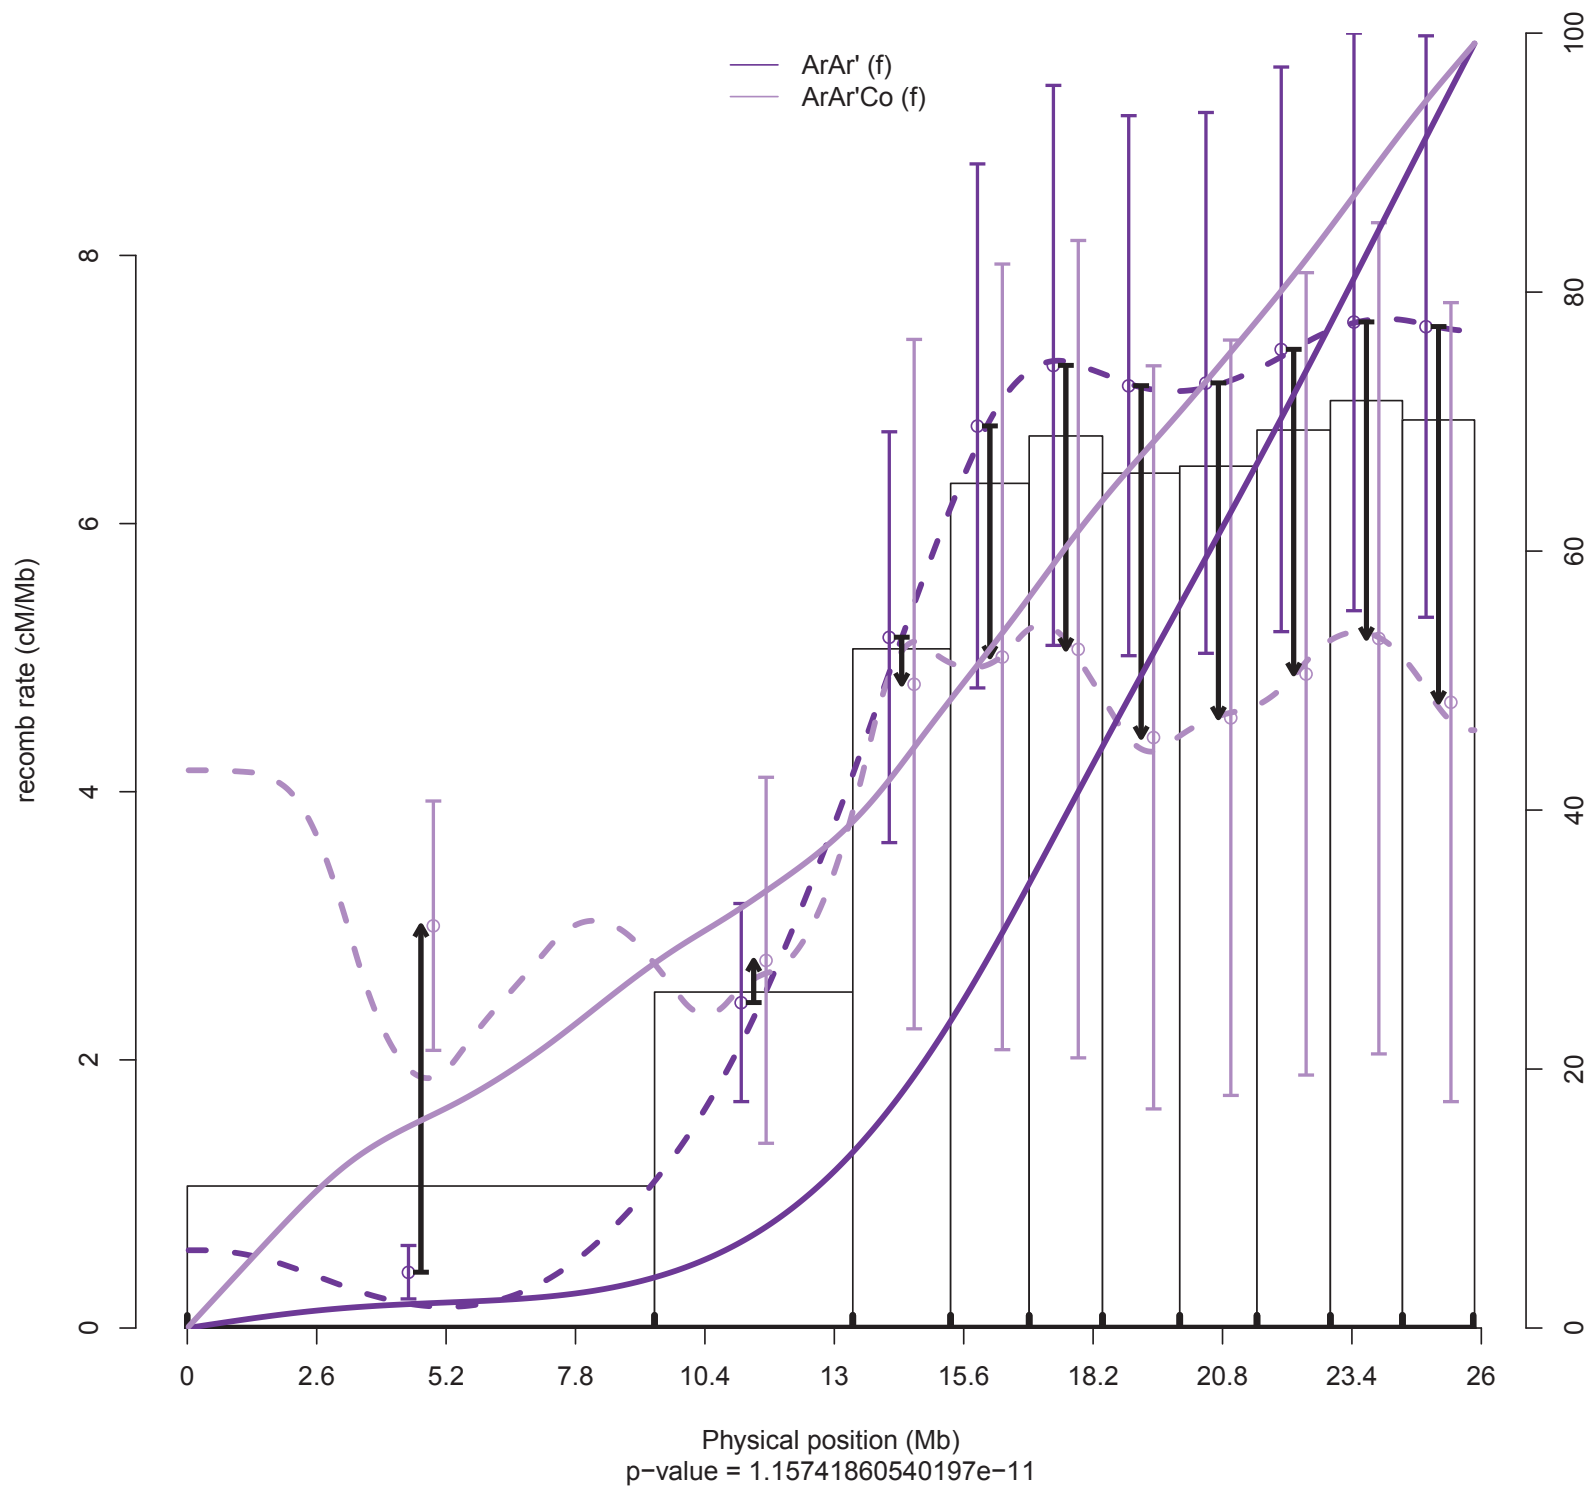

# ArAr' (f) - ArAr'Co (f) chr 8

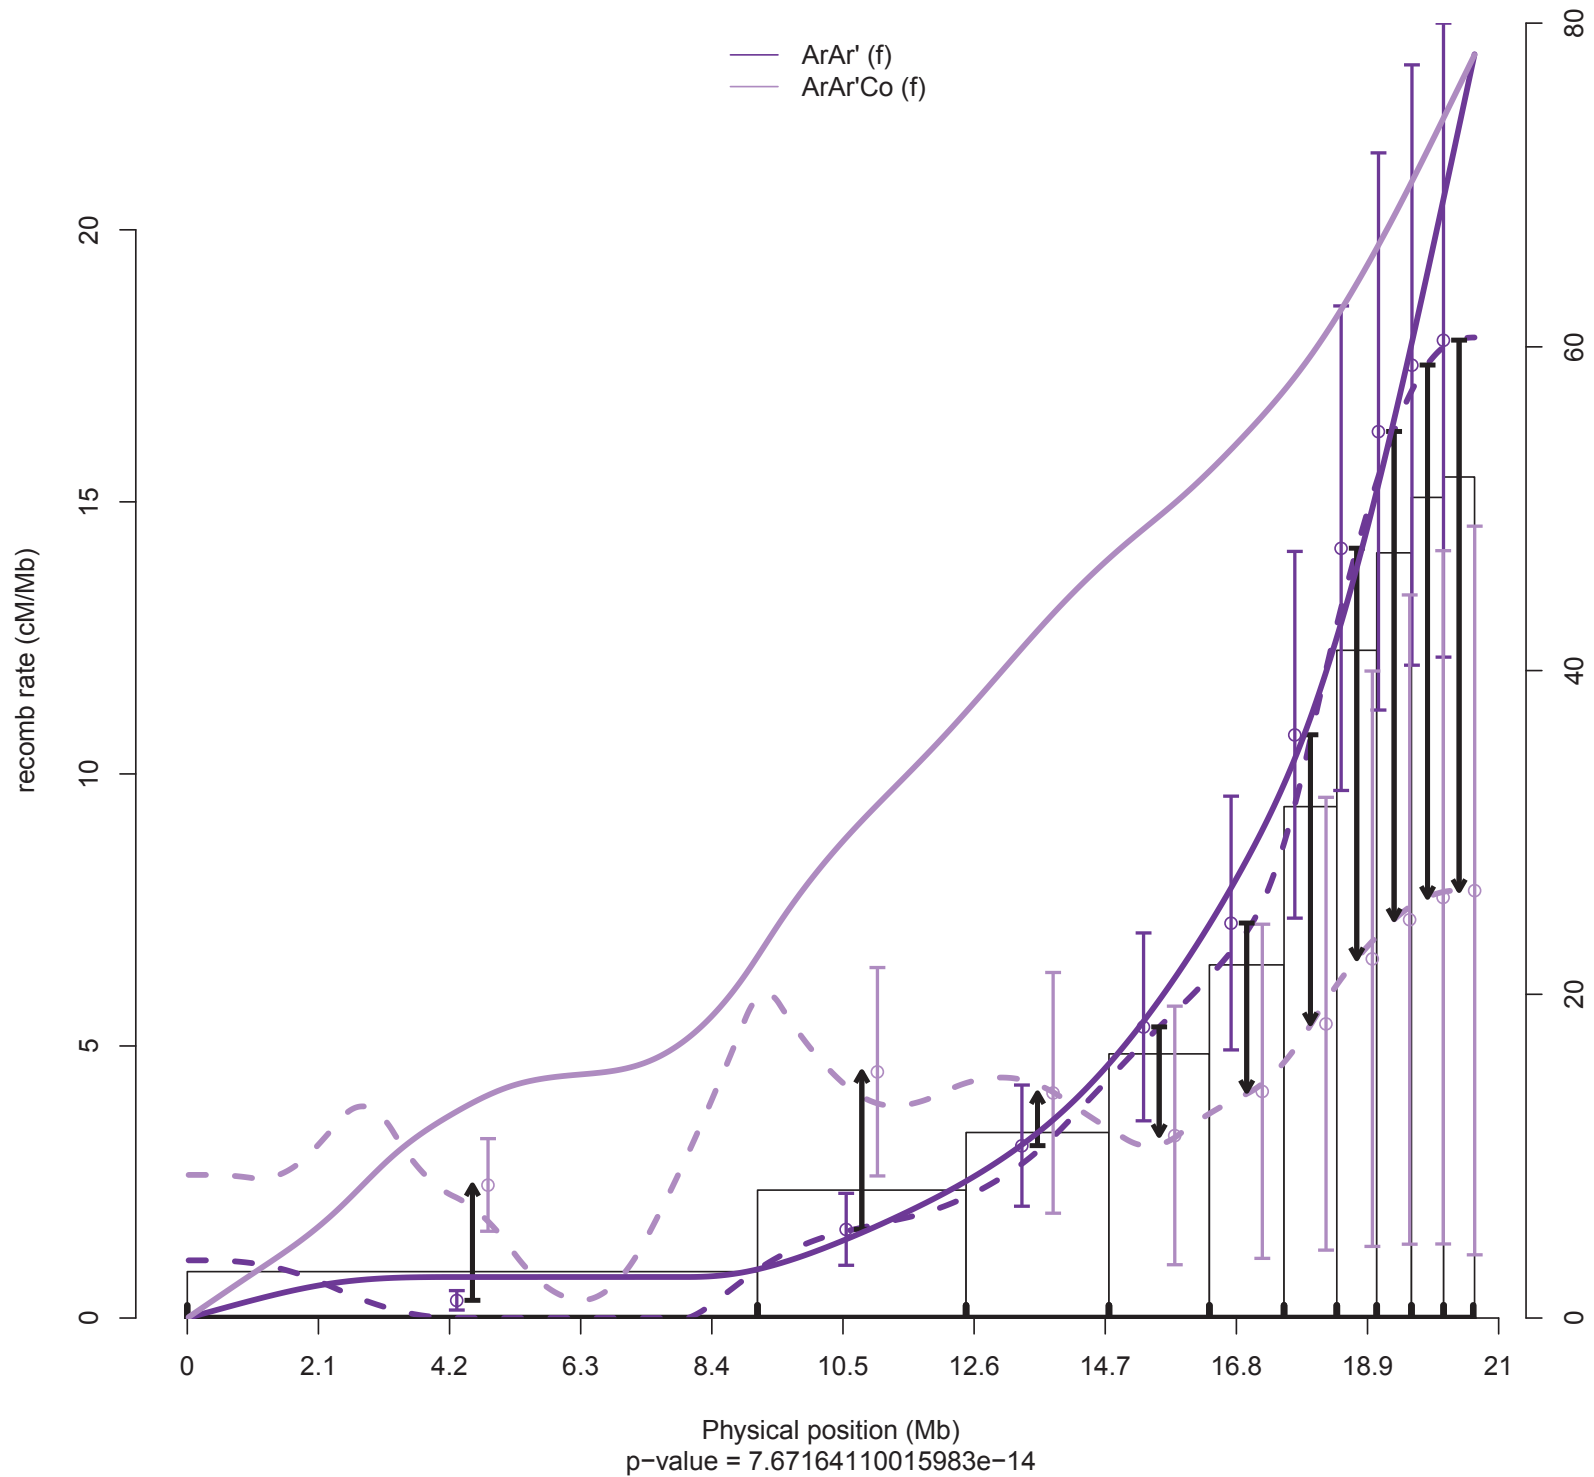



# ArAr' (f) - ArAr'Co (f) chr 9

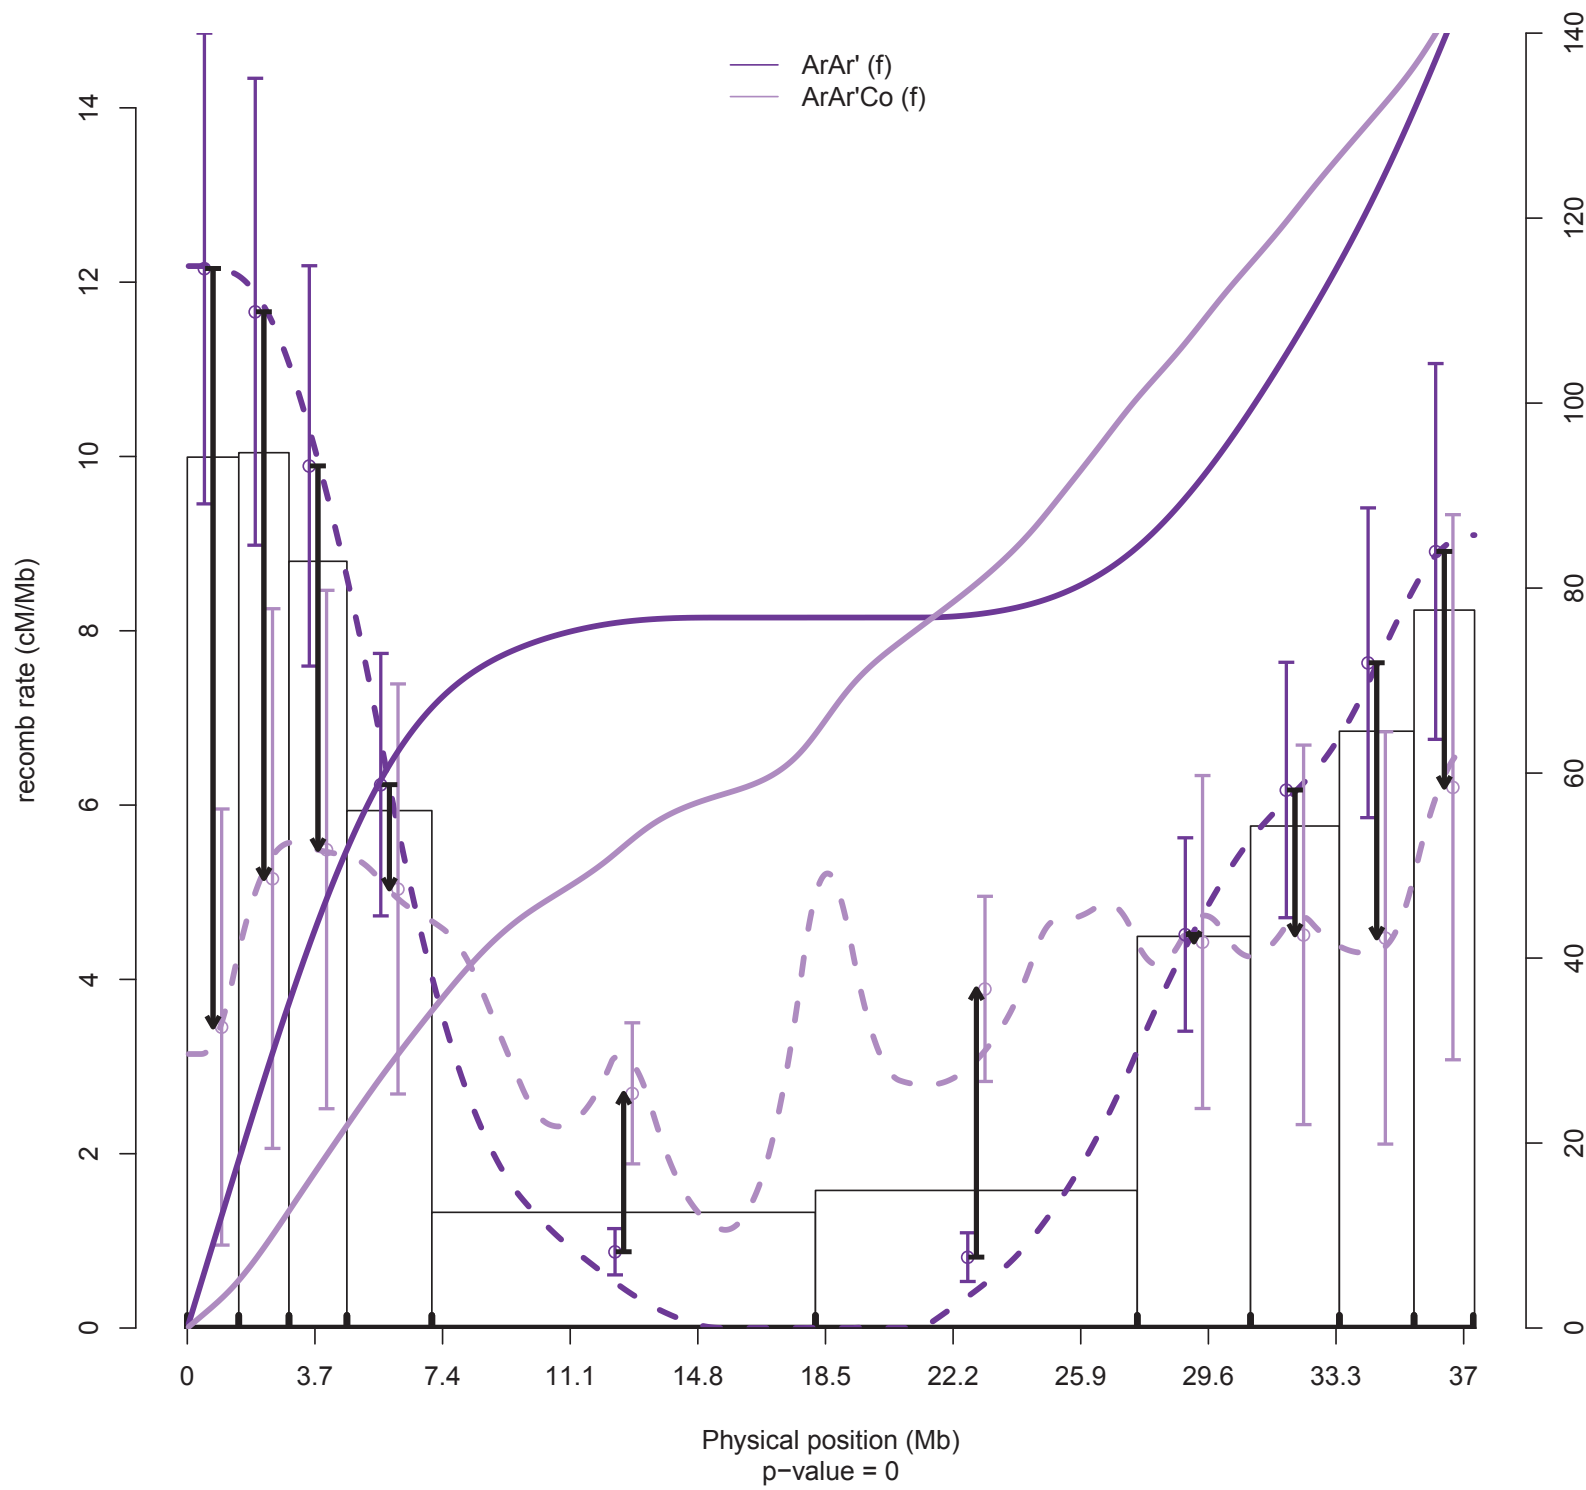

# ArAr' (f) - ArAr'Co (f) chr 10

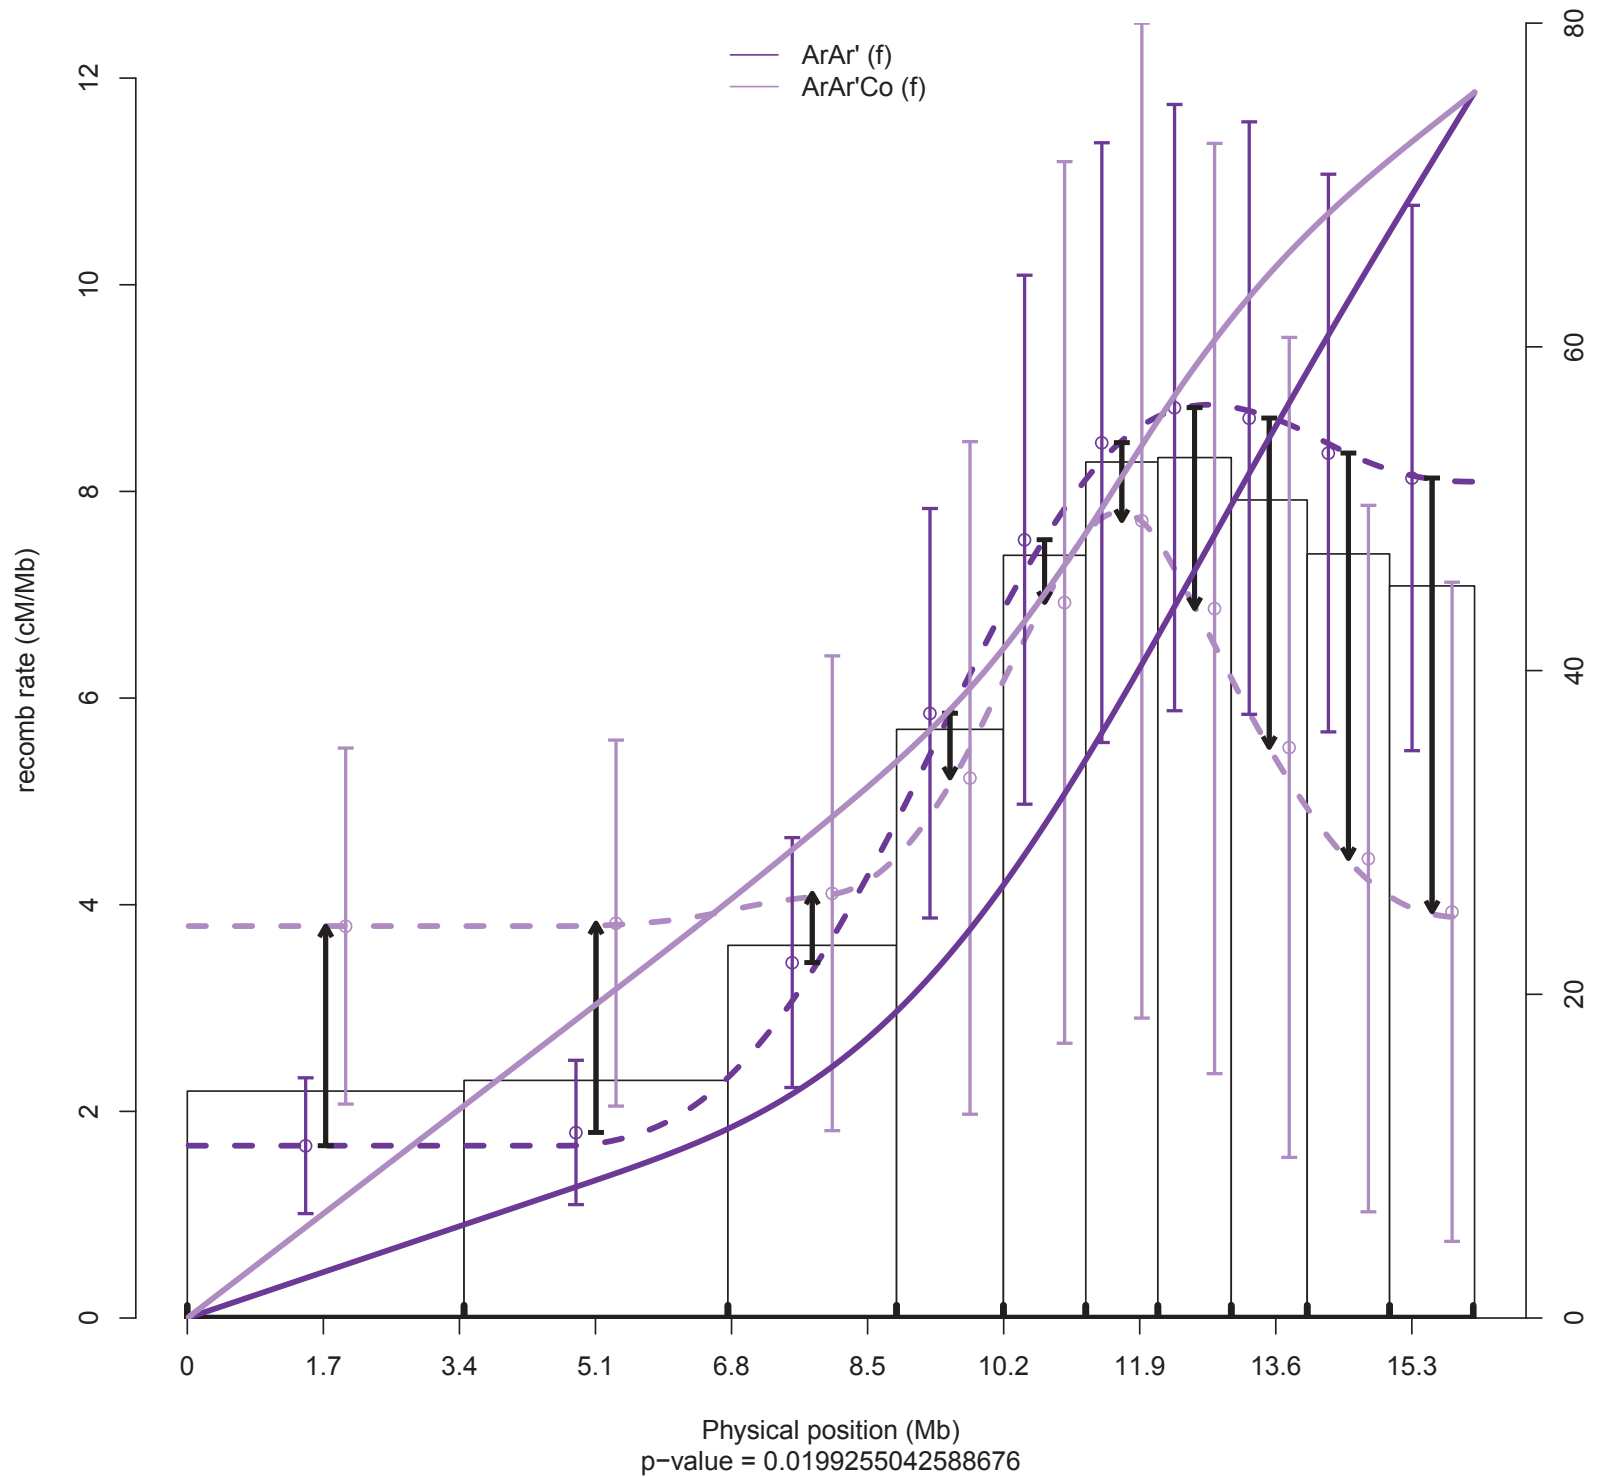

# AnAr' (f) - AnAr'Cn (f) chr 1

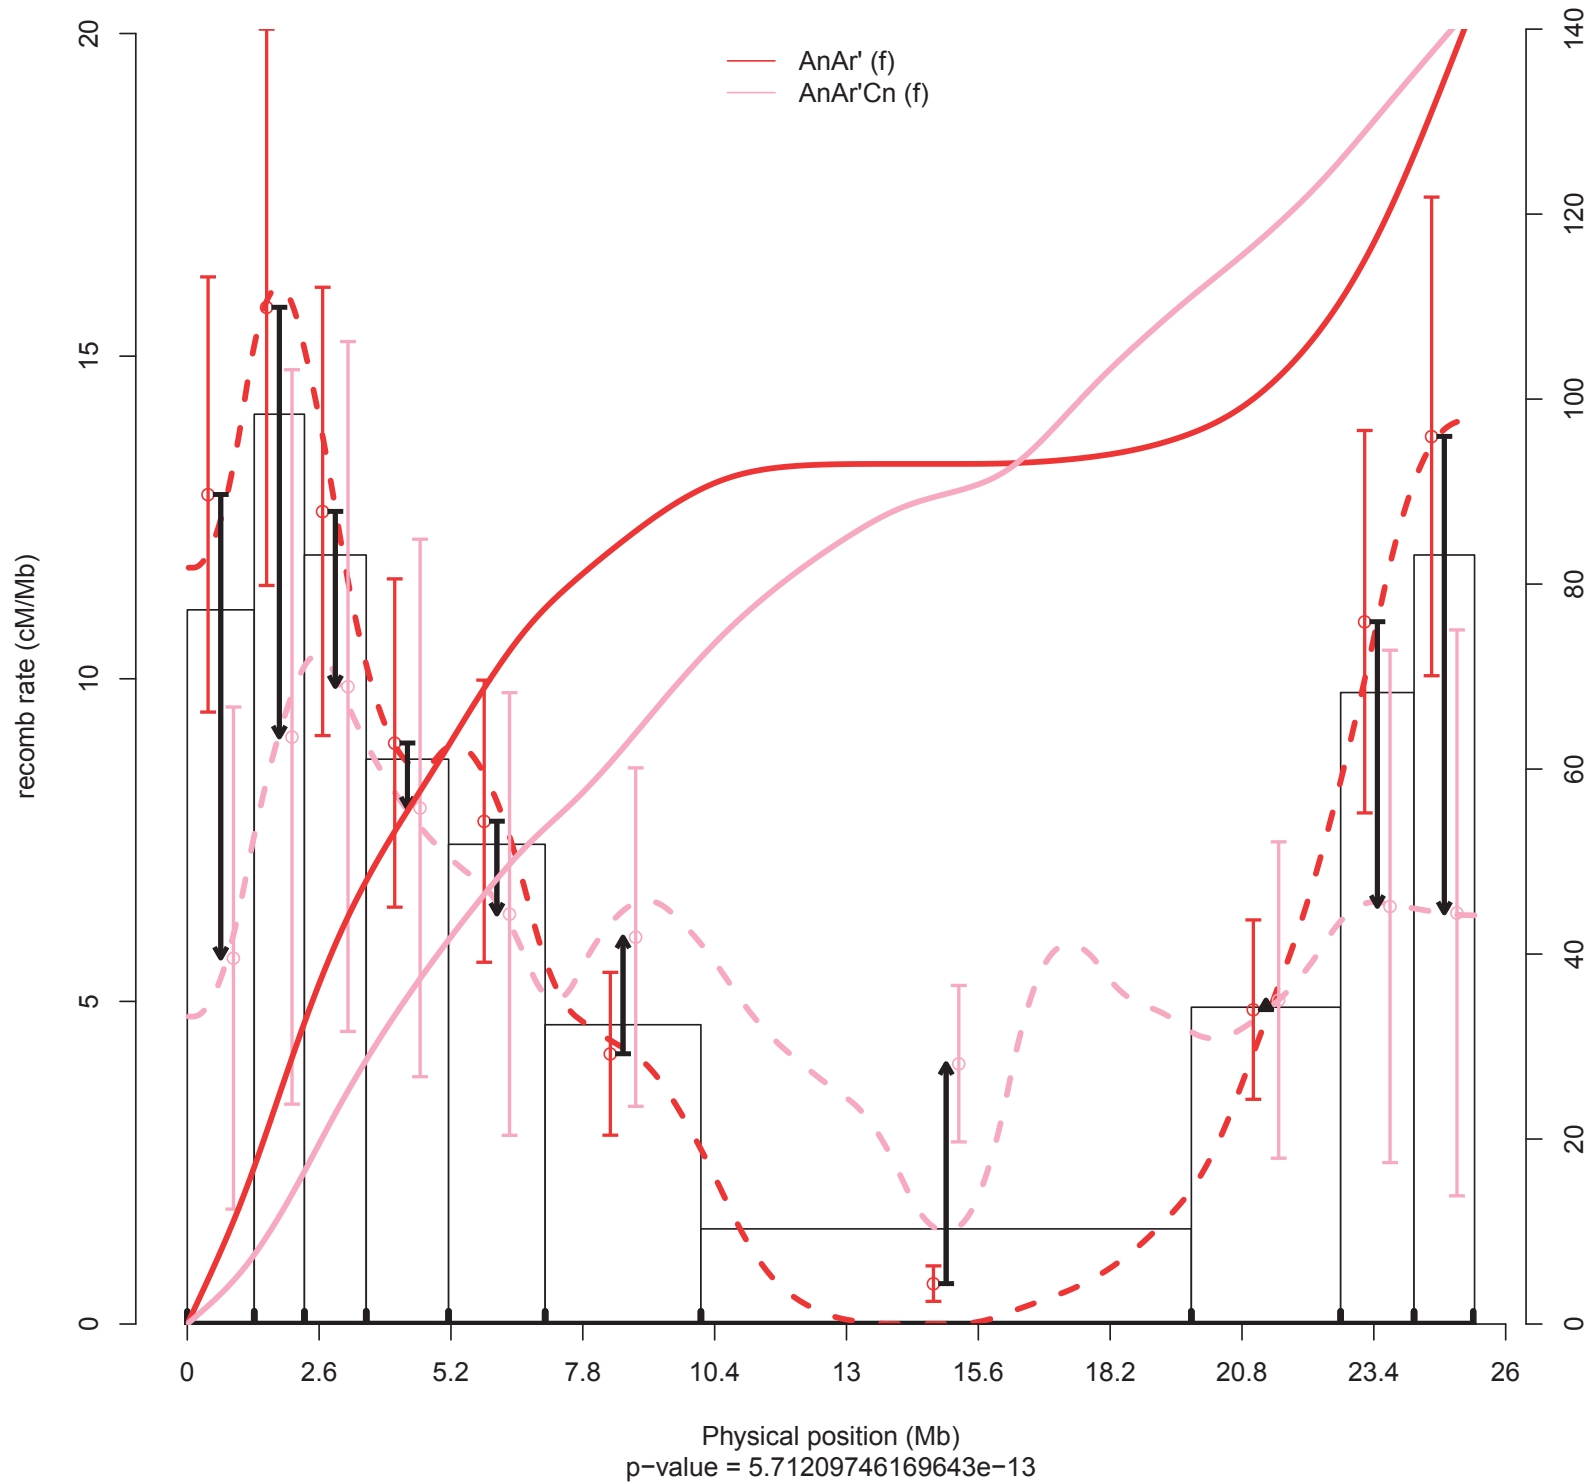

# AnAr' (f) - AnAr'Cn (f) chr 2

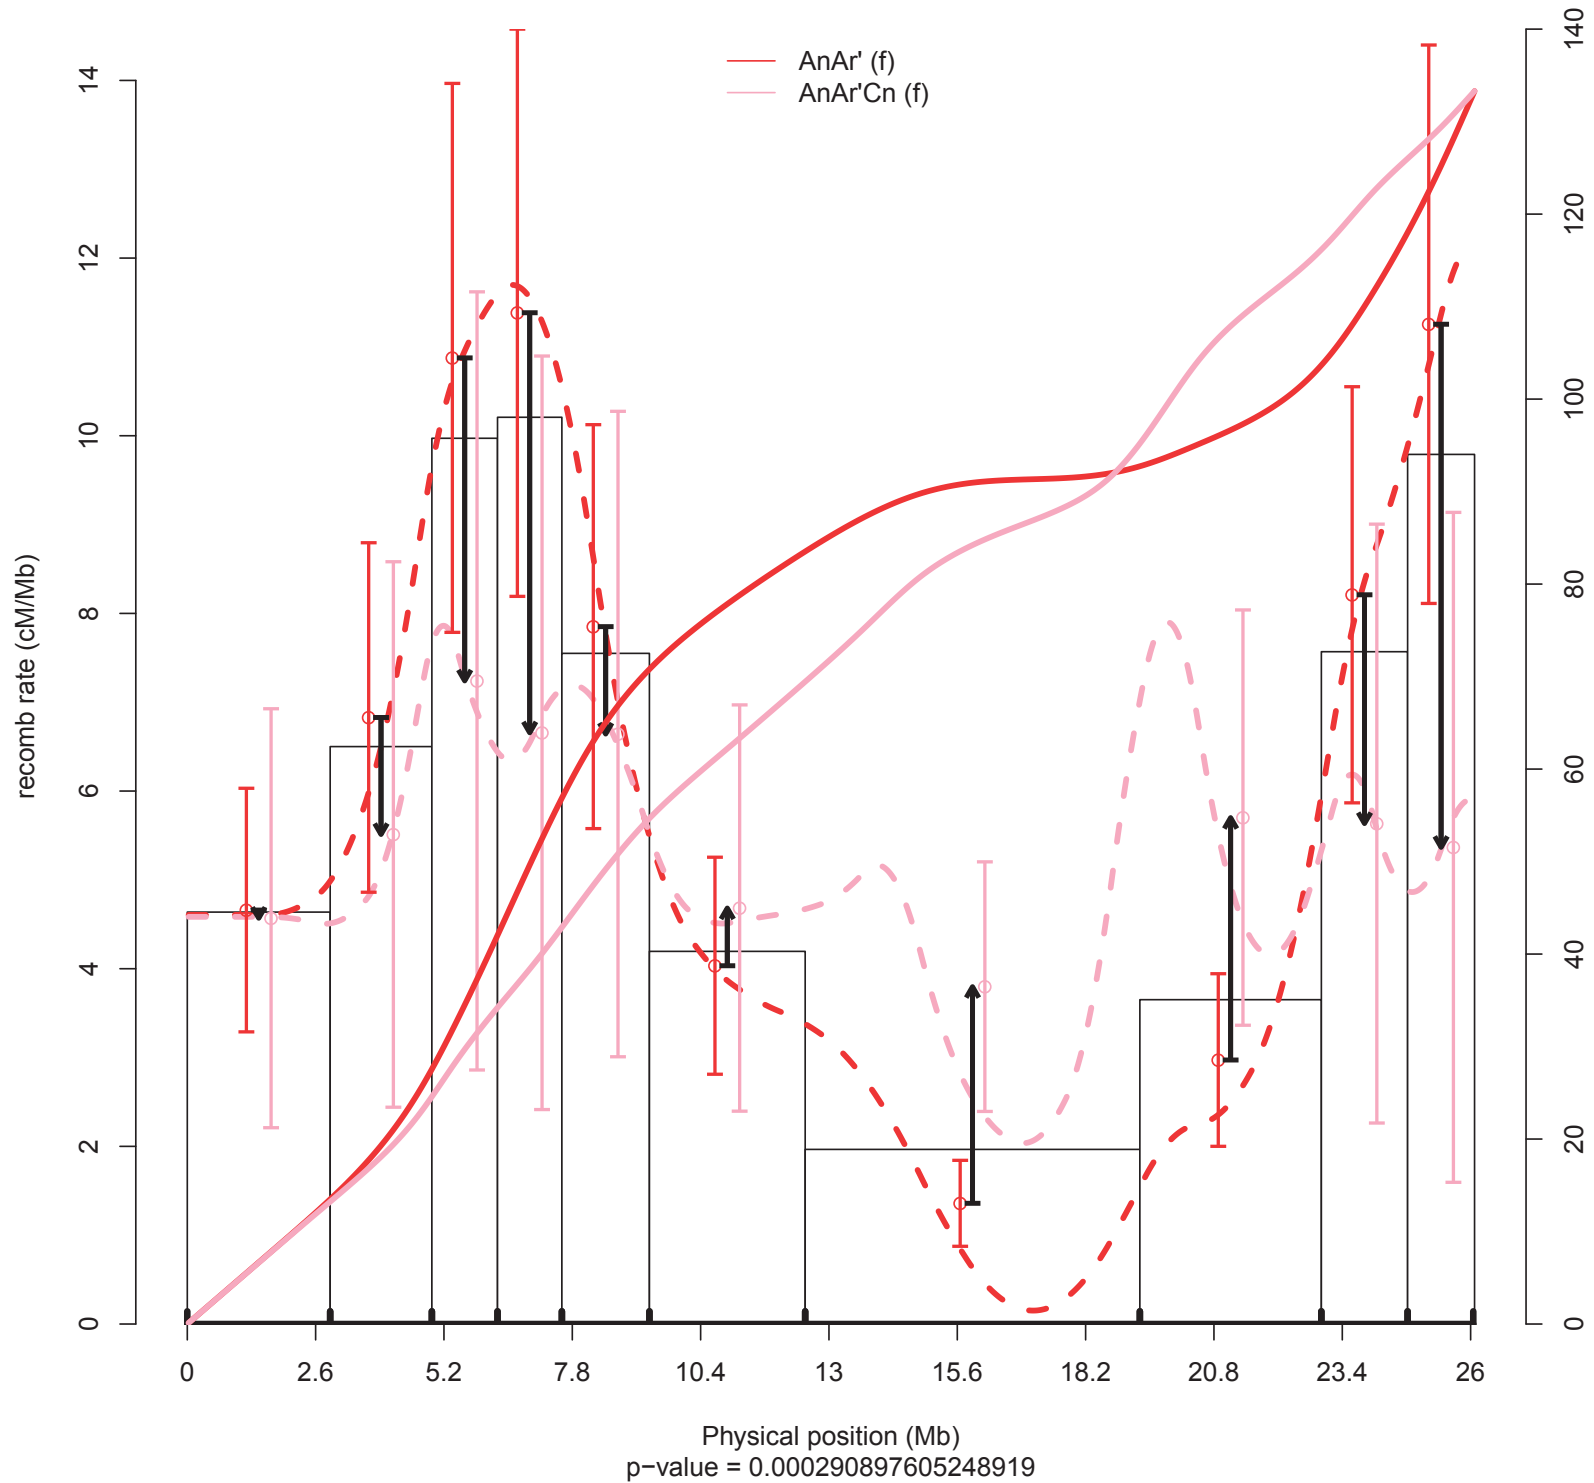

### AnAr' (f) - AnAr'Cn (f) chr 3

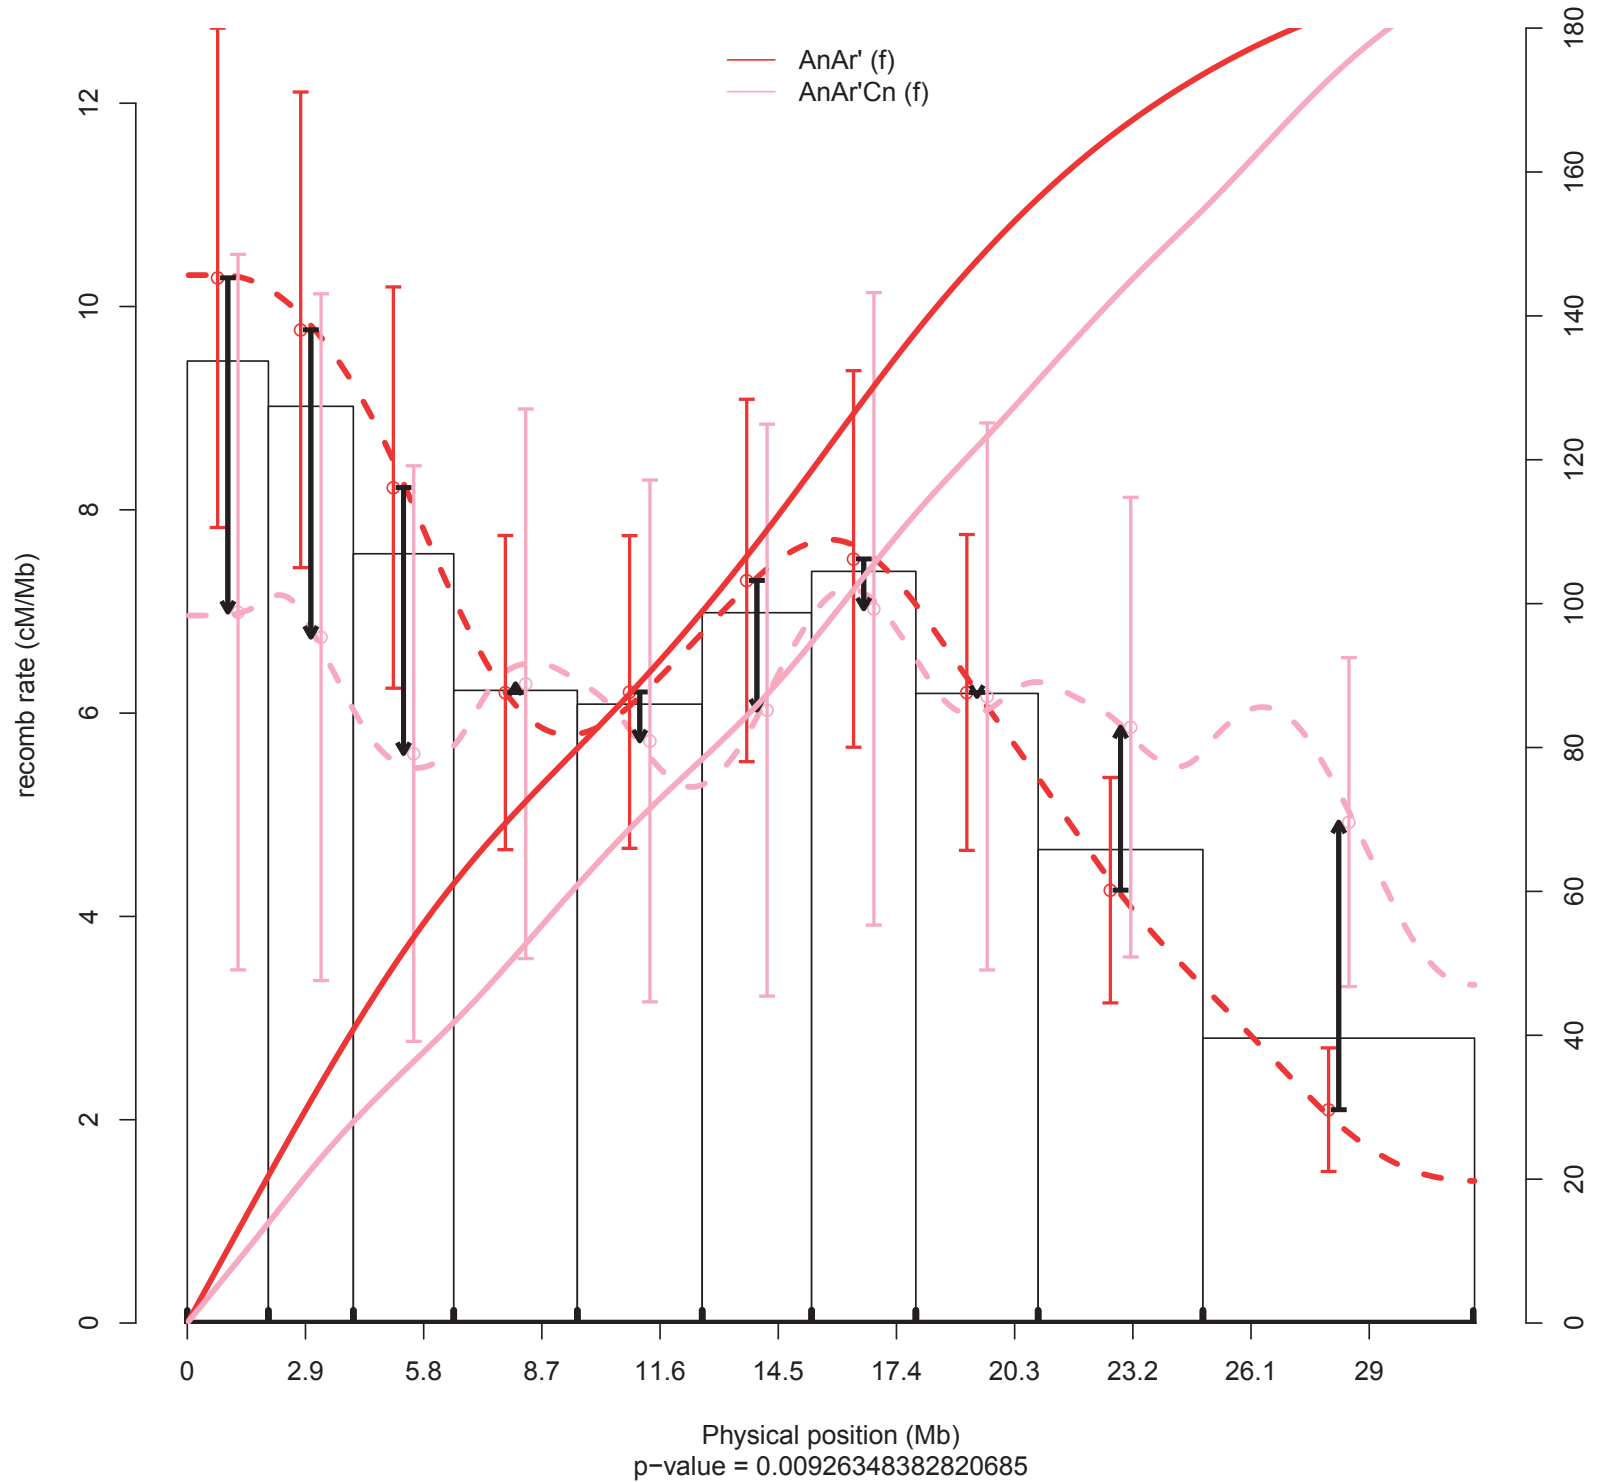

# AnAr' (f) – AnAr'Cn (f) chr 4

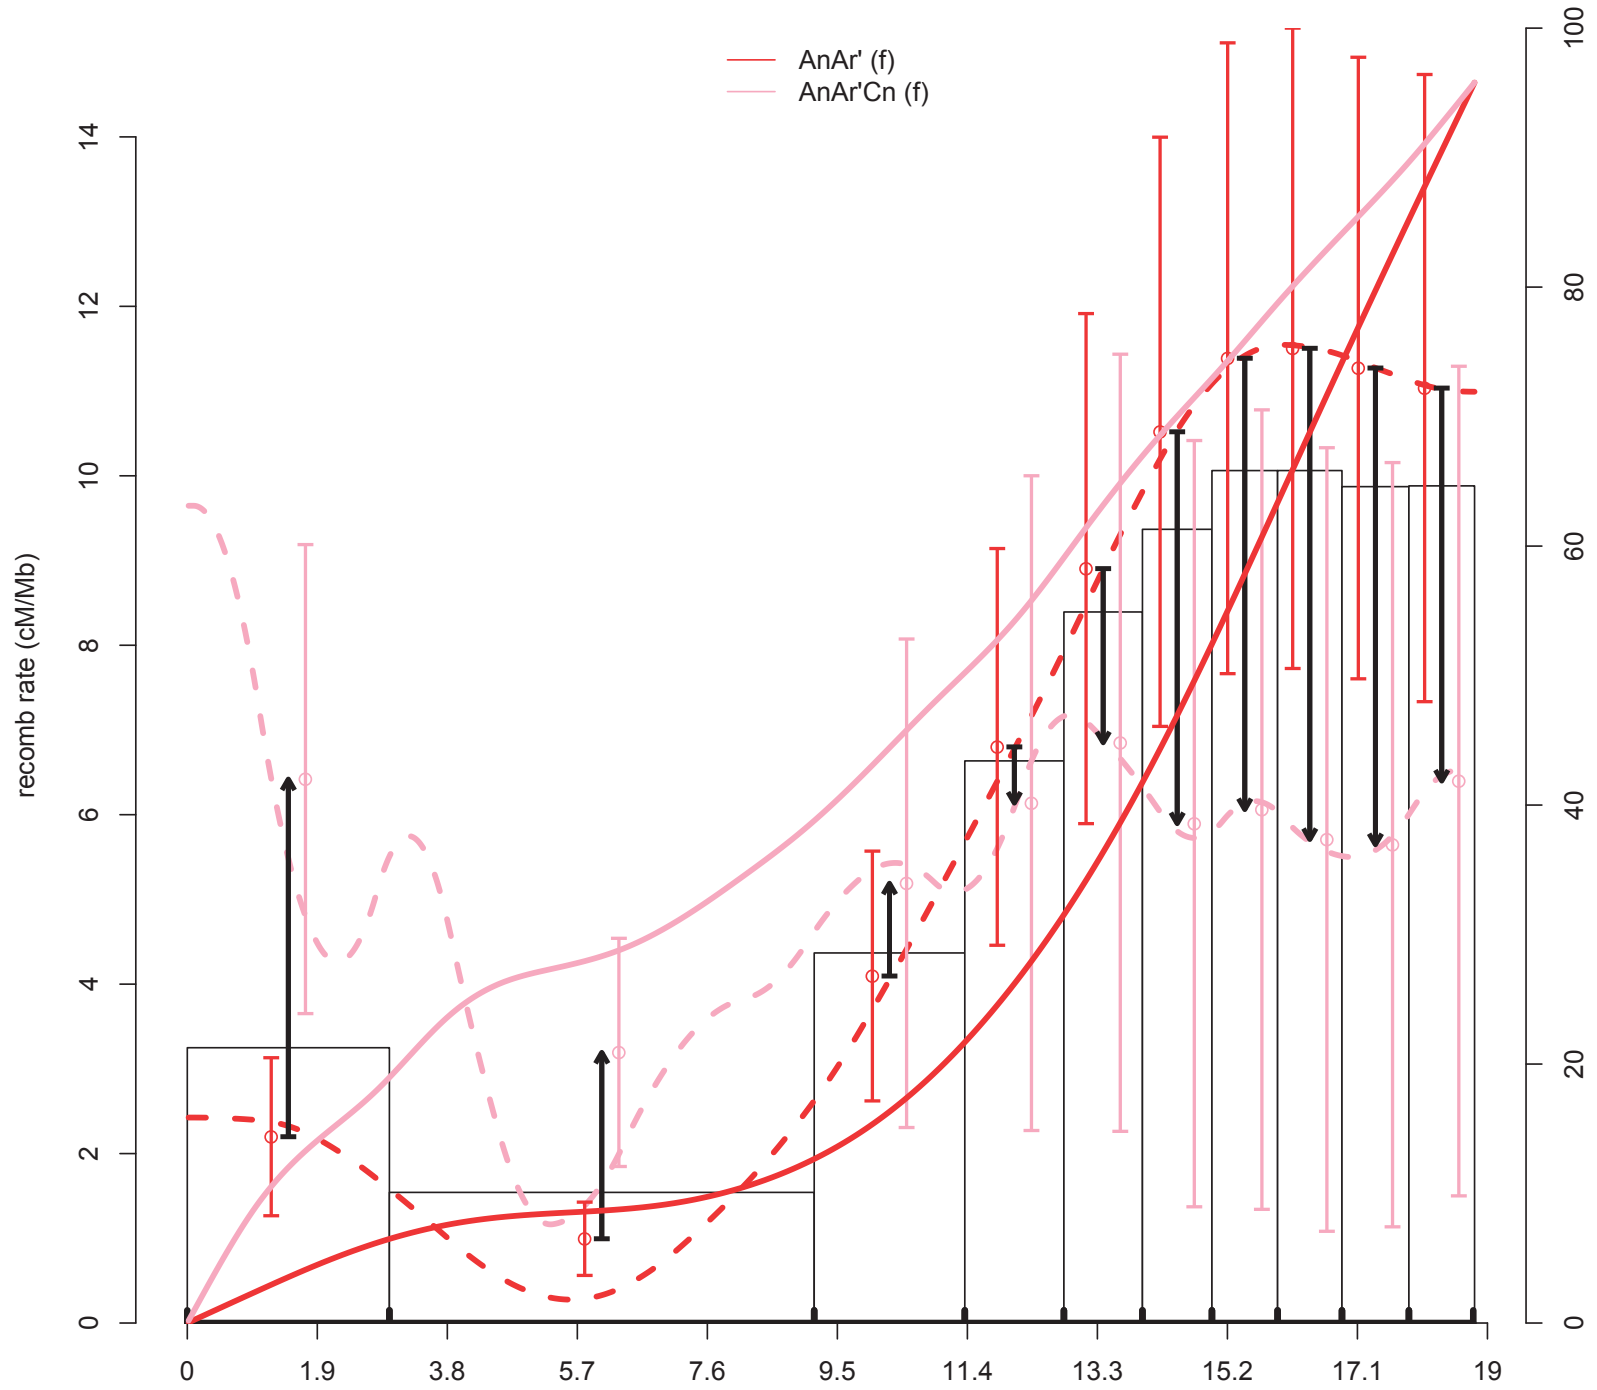

Physical position (Mb)  
p-value = 1.04399734456306e-05

# AnAr' (f) - AnAr'Cn (f) chr 5

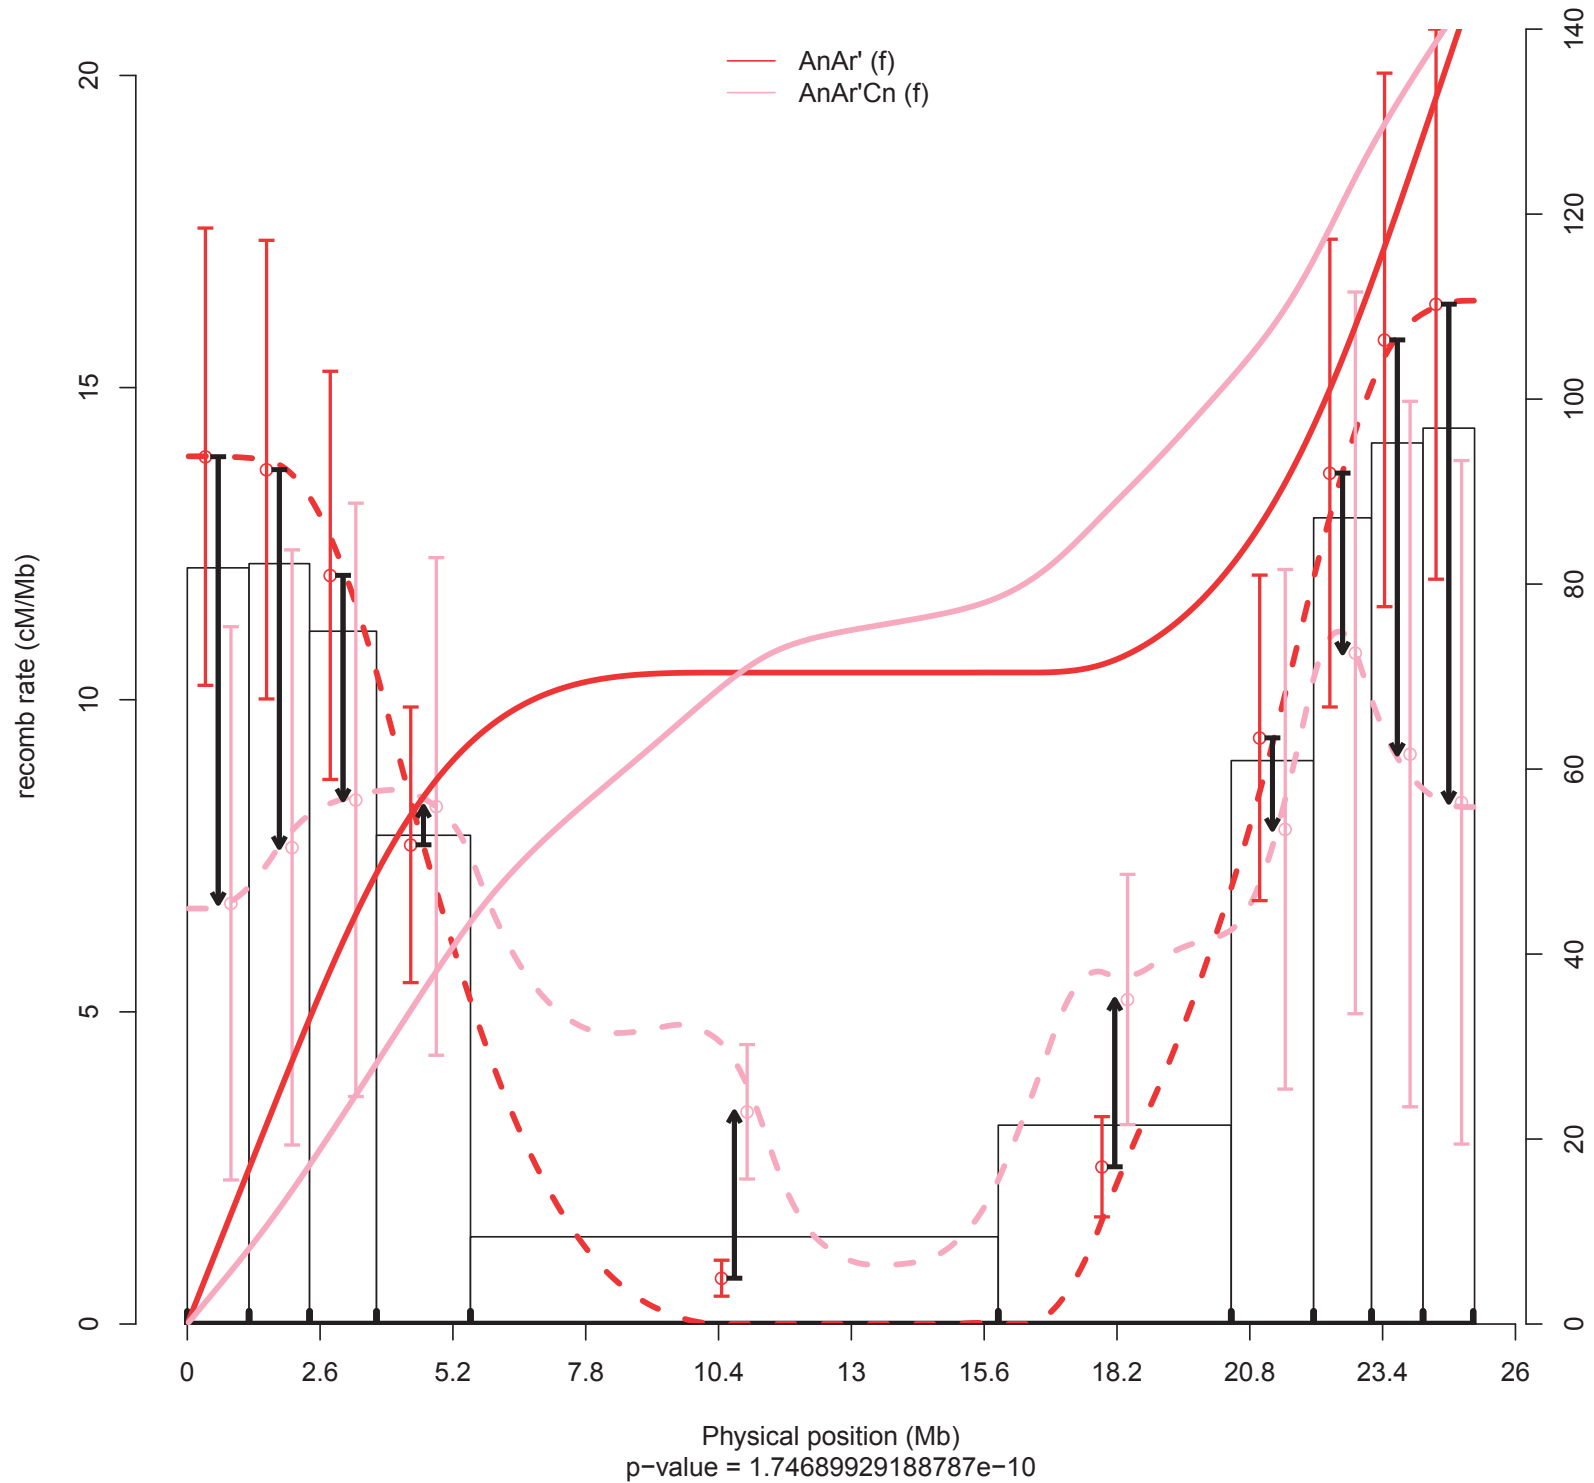

# AnAr' (f) - AnAr'Cn (f) chr 6

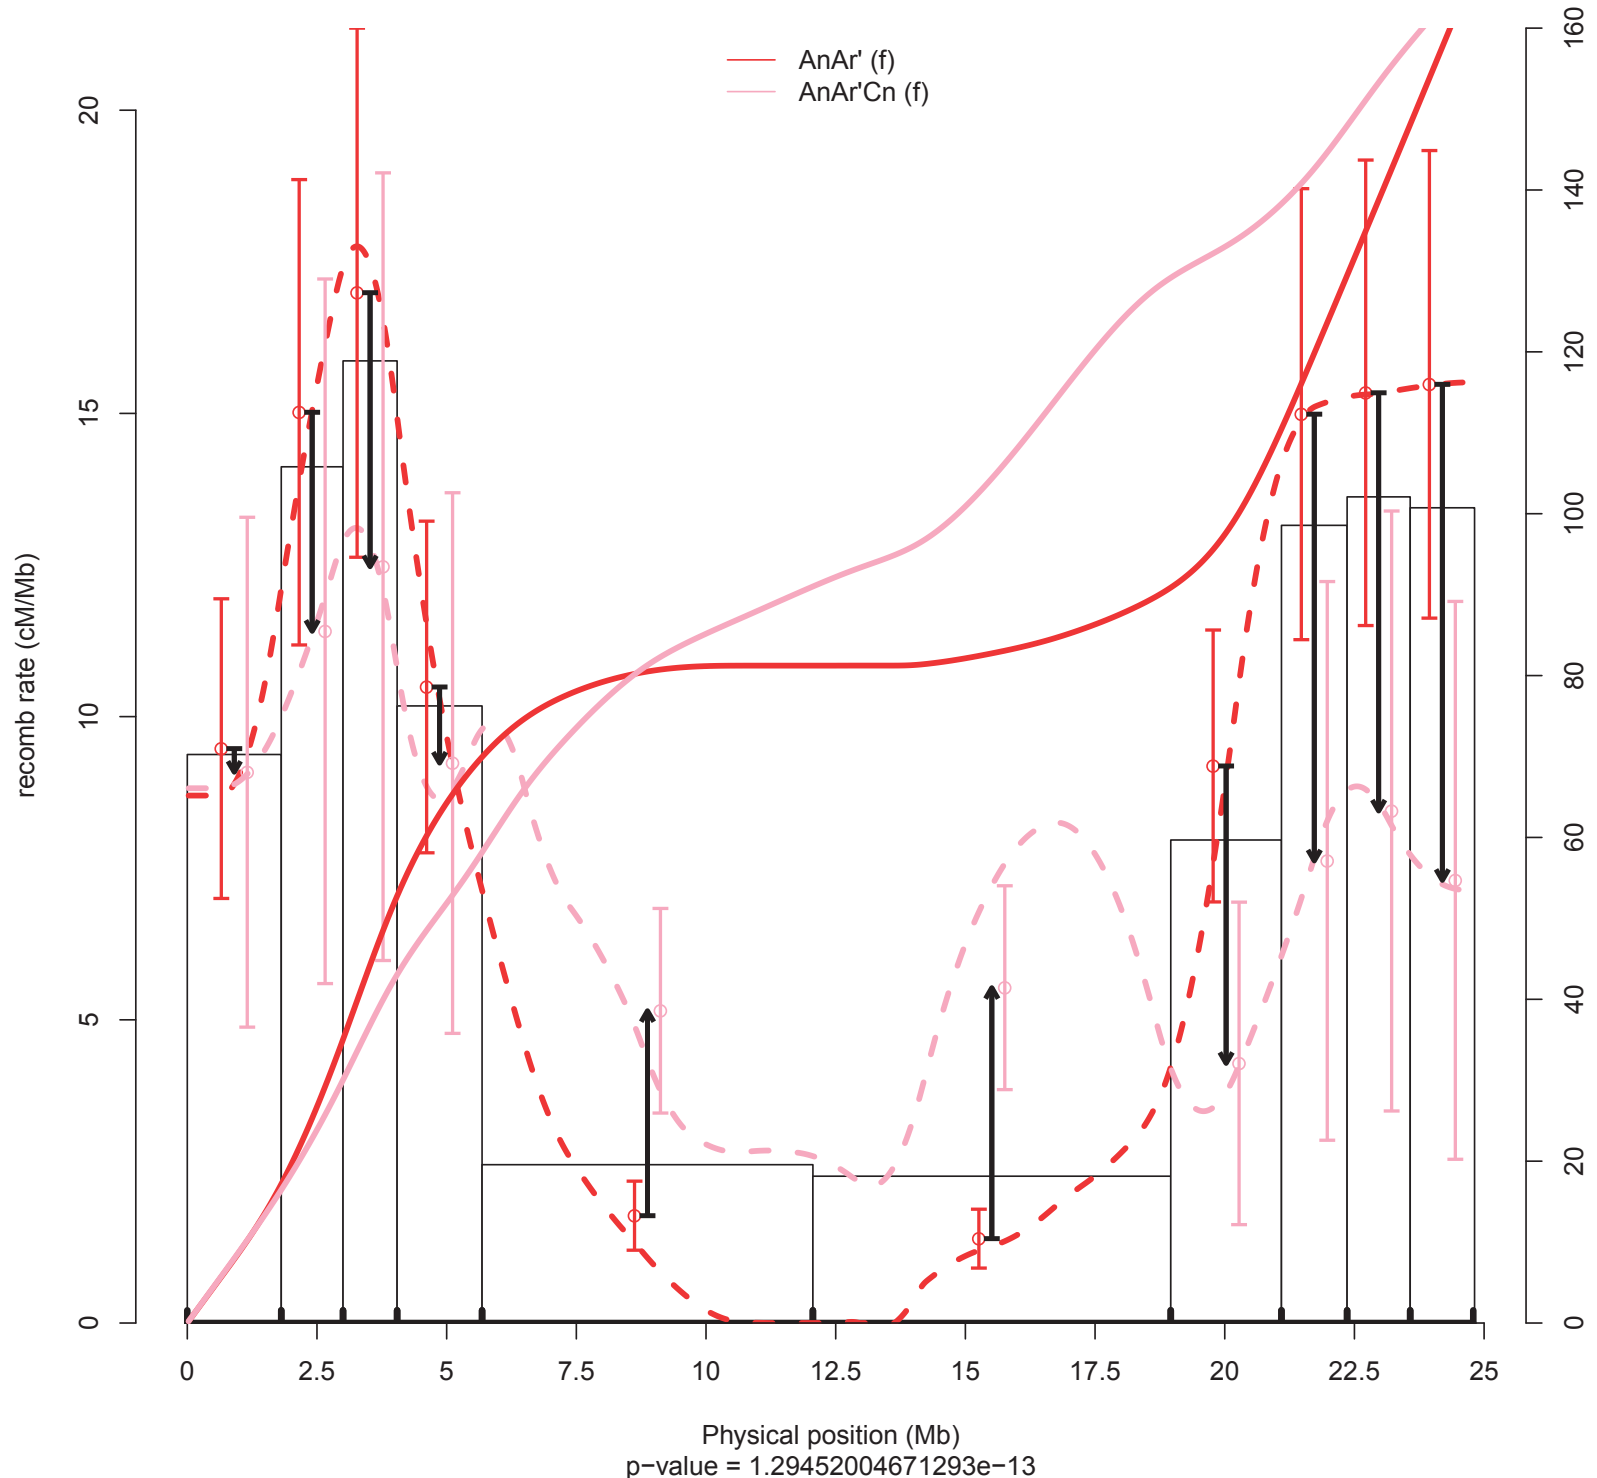

Physical position (Mb)  
p-value = 1.29452004671293e-13



# AnAr' (f) - AnAr'Cn (f) chr 7

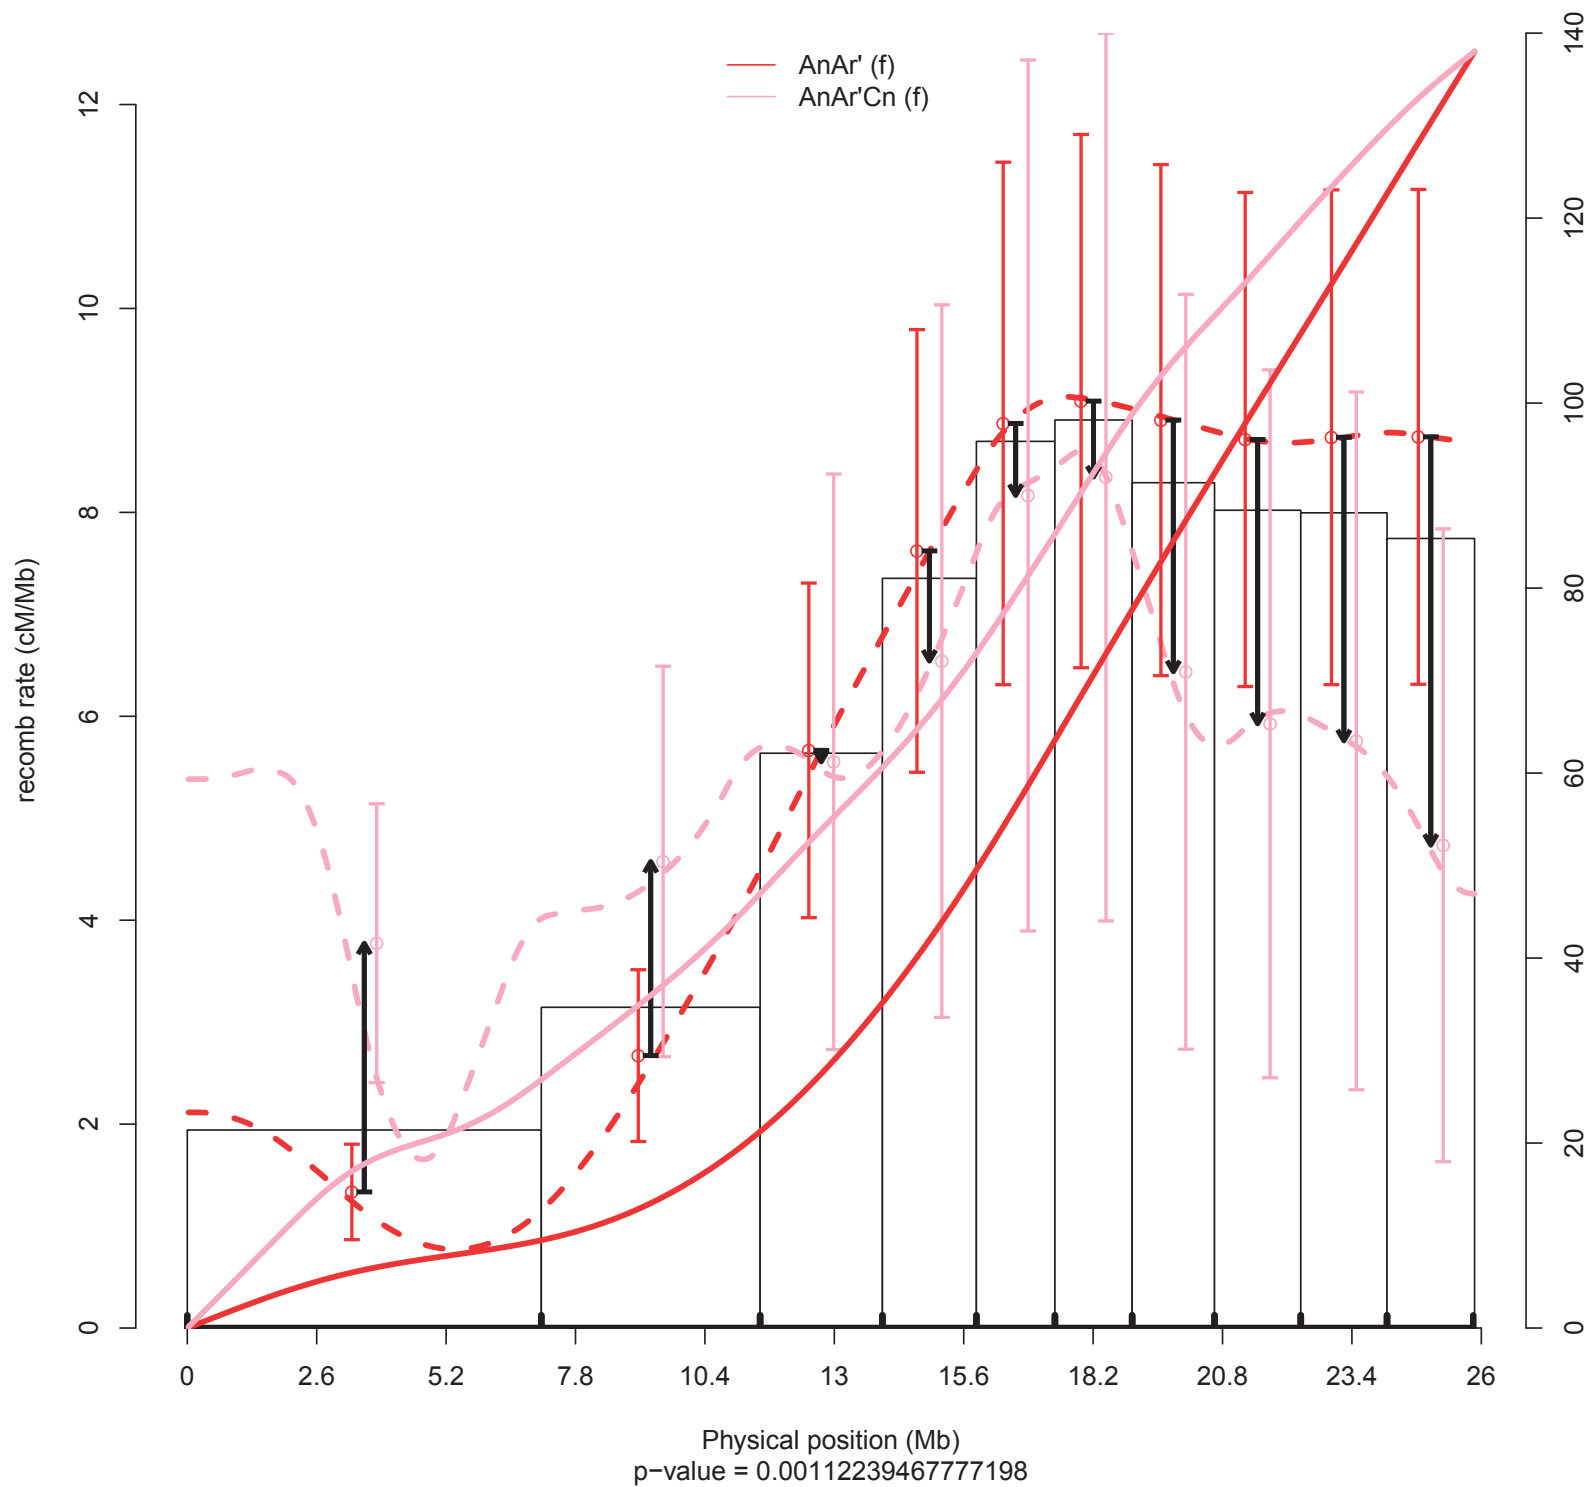

# AnAr' (f) - AnAr'Cn (f) chr 8

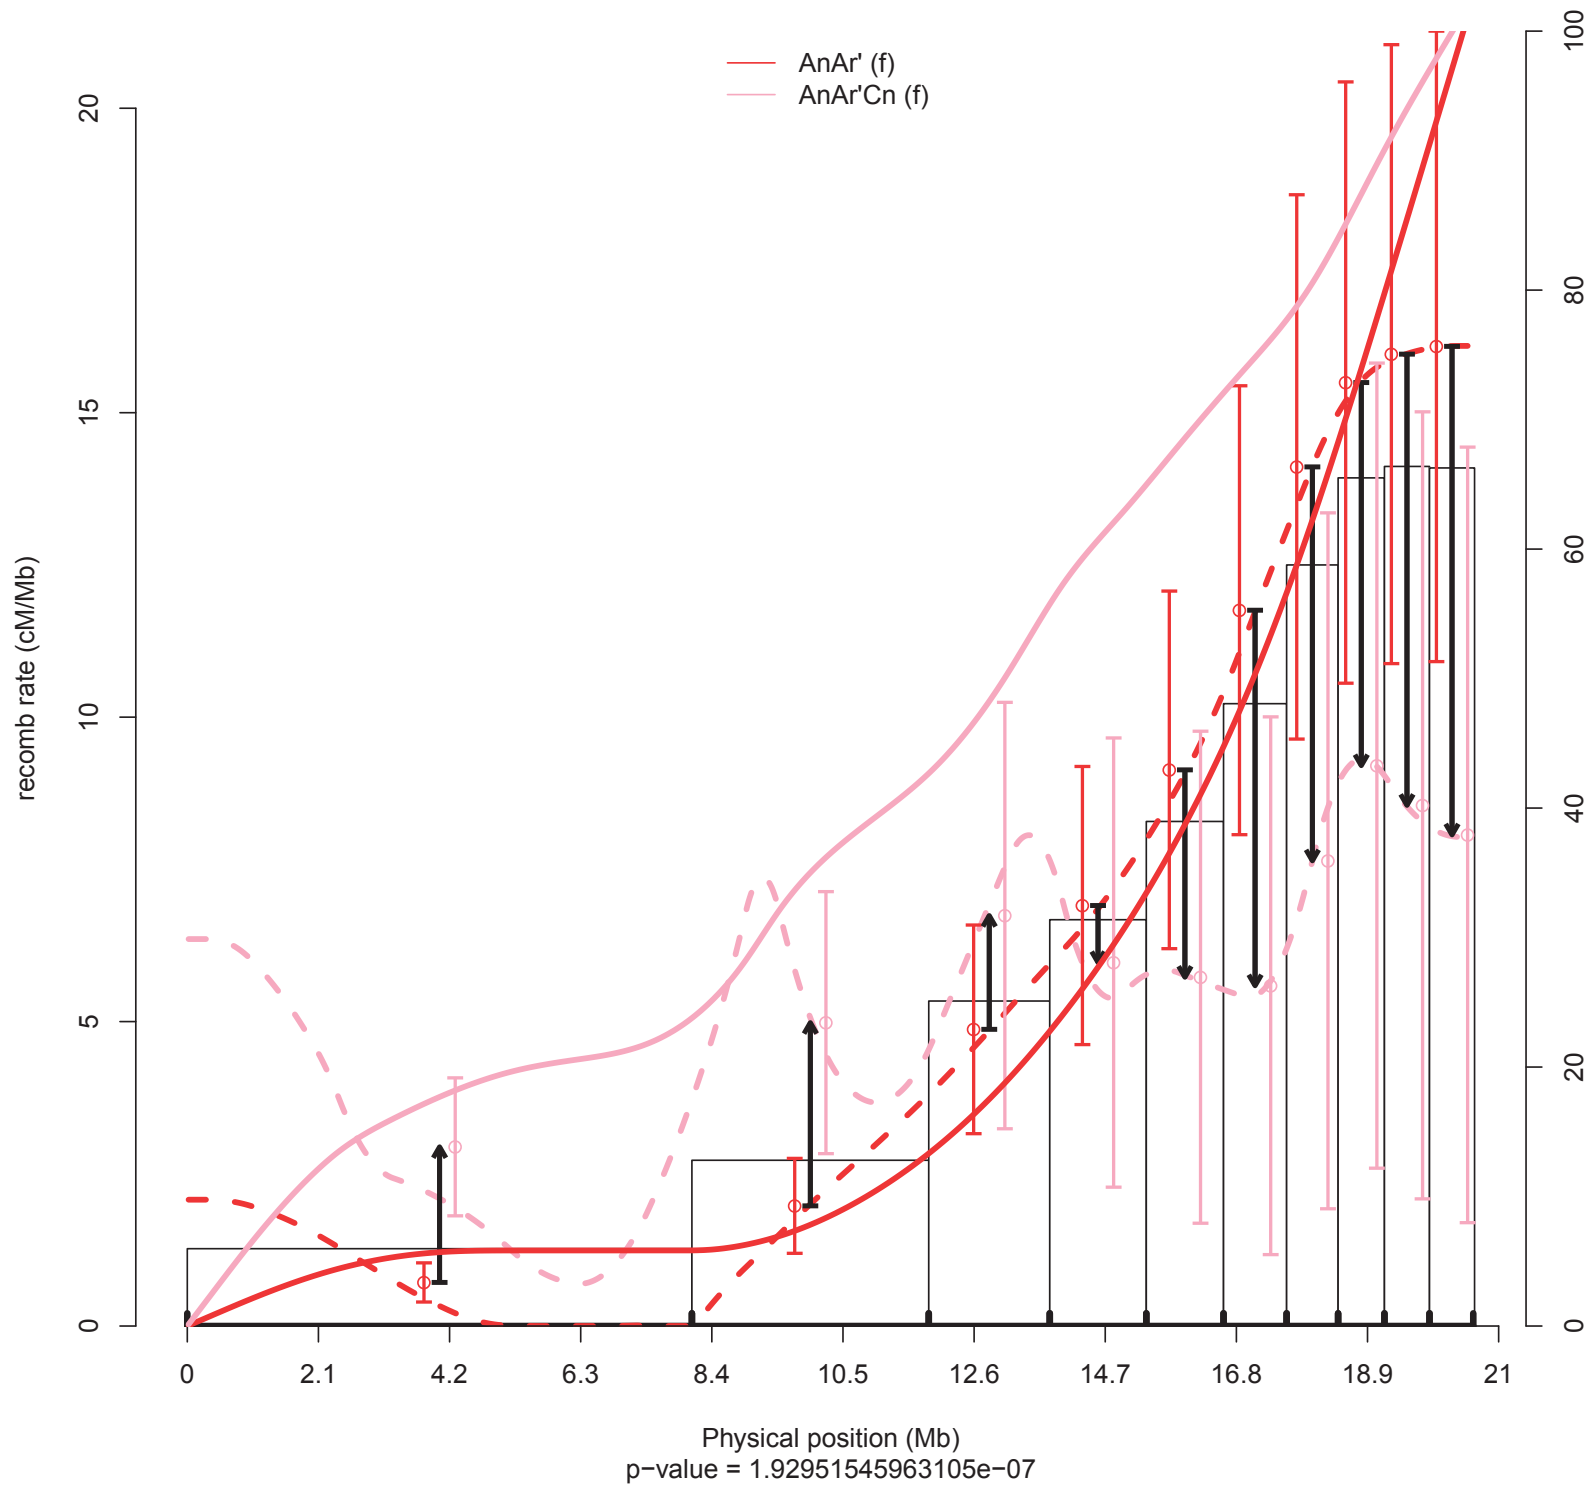

# AnAr' (f) – AnAr'Cn (f) chr 9

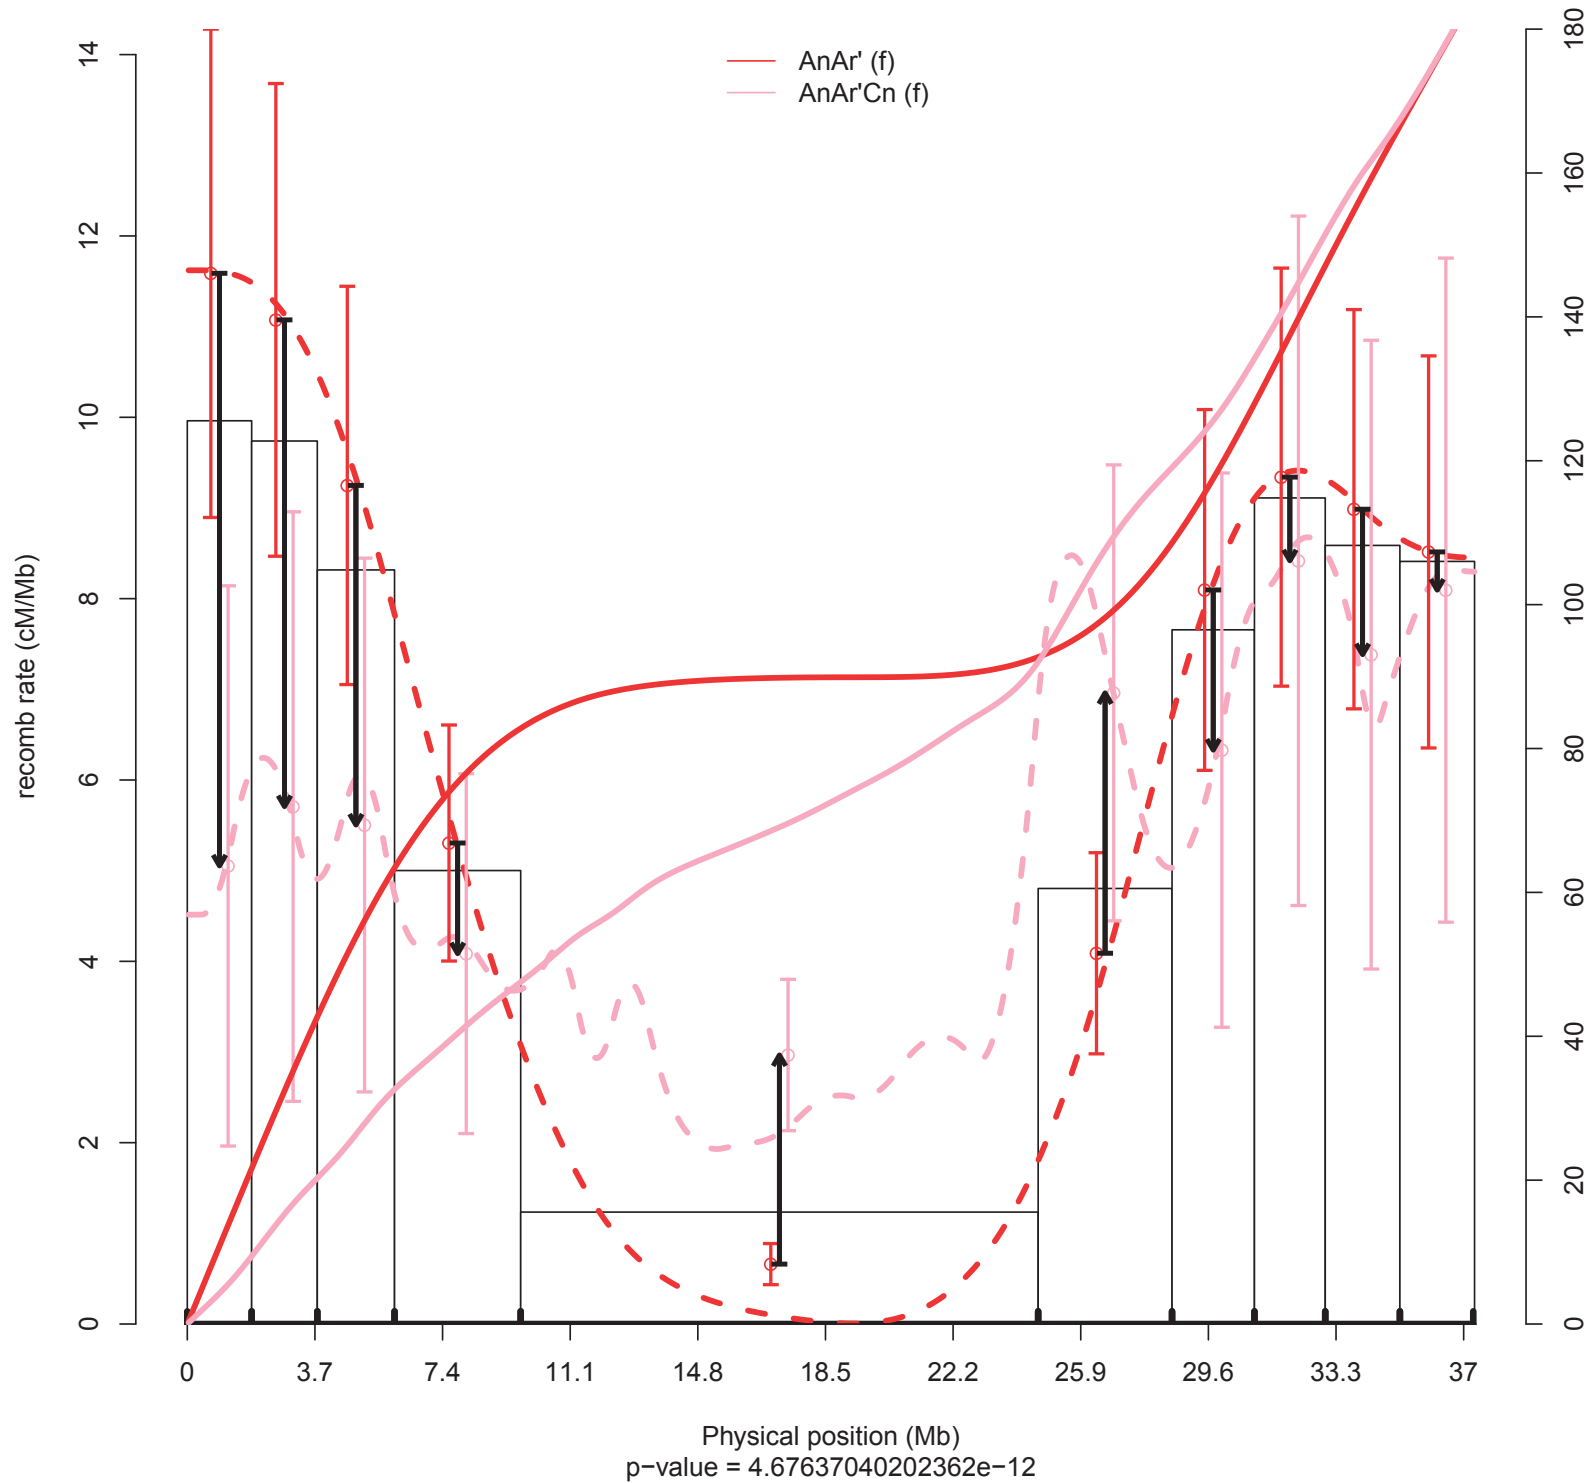

# AnAr' (f) - AnAr'Cn (f) chr 10

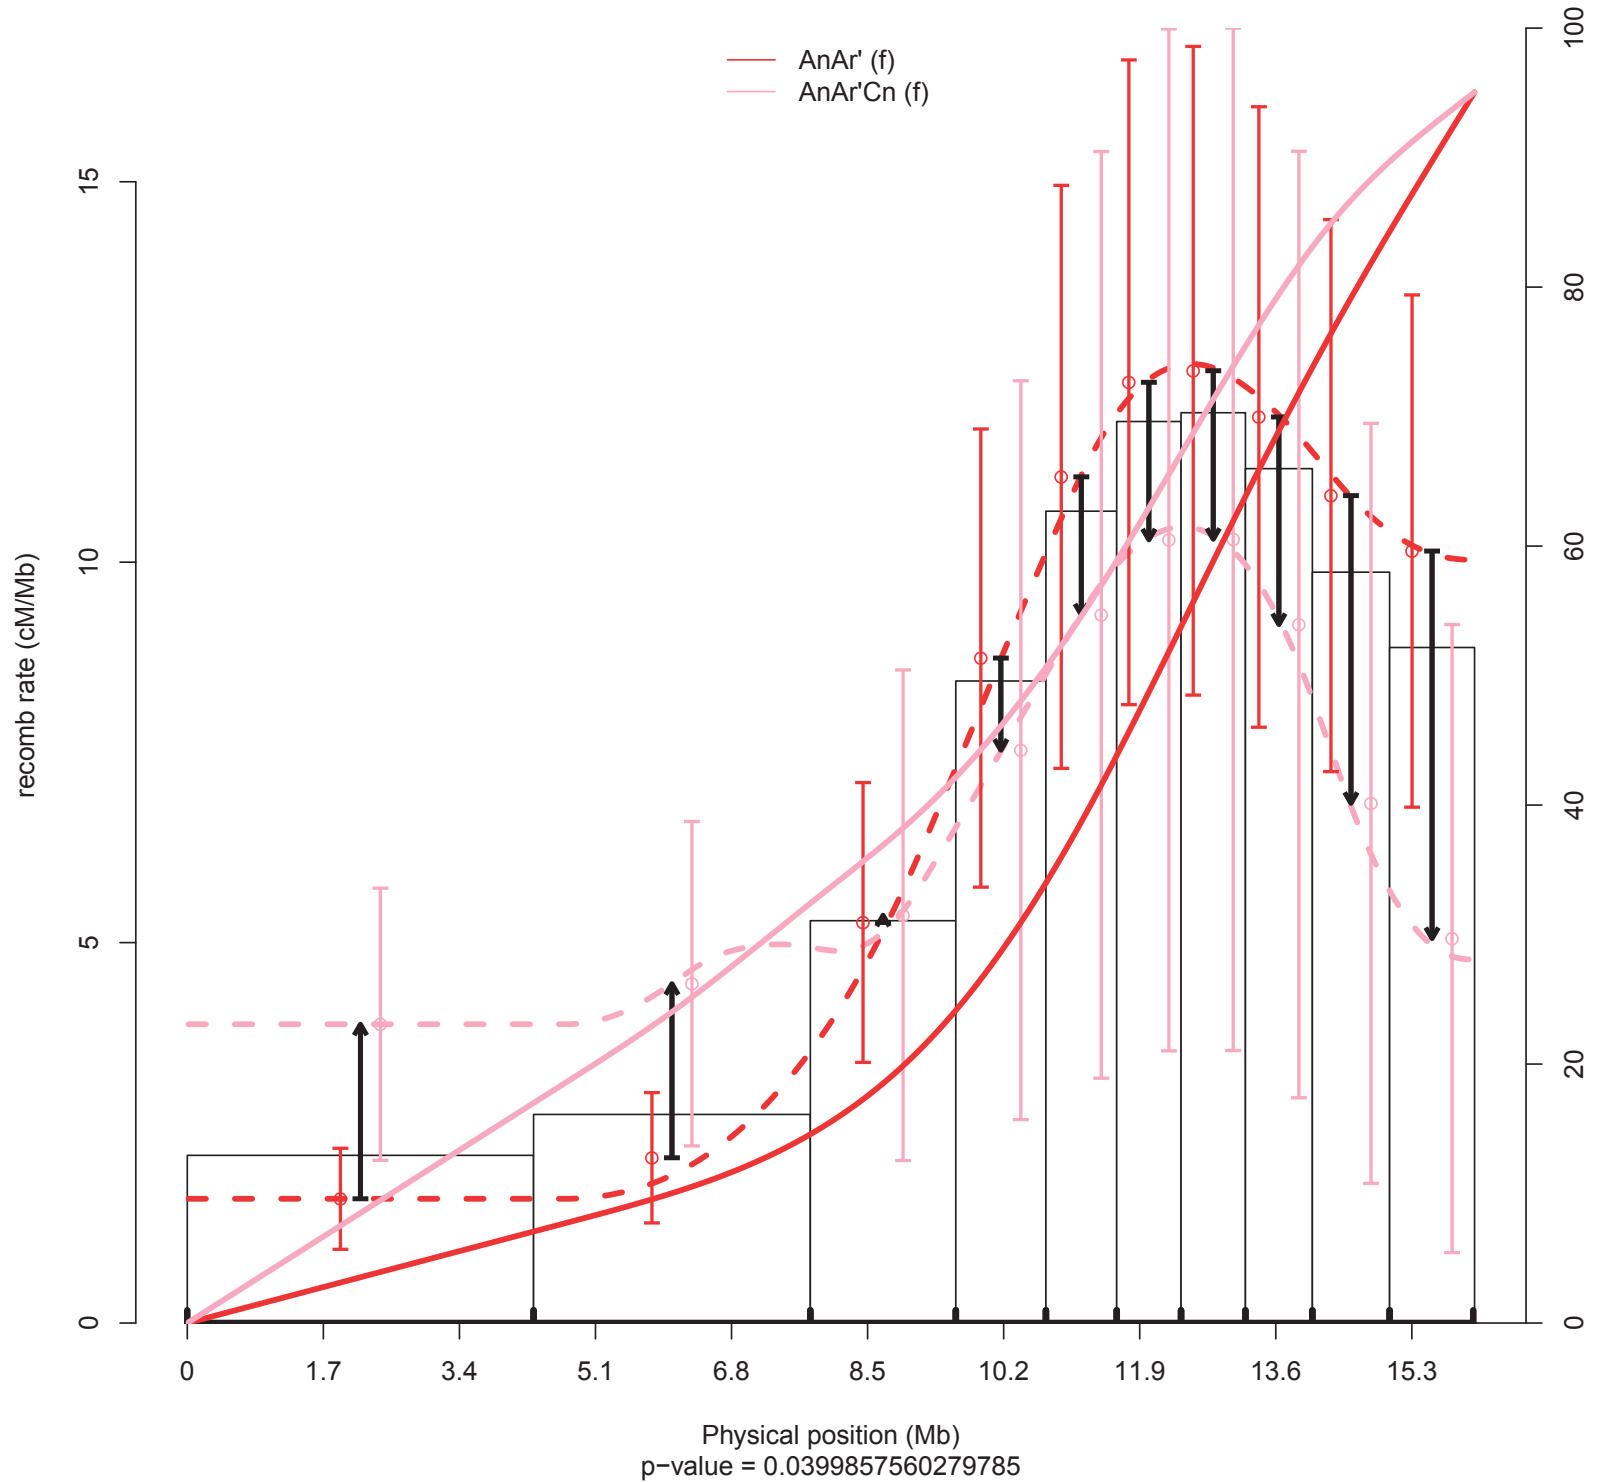

# AnAr' (m) - AnAr'Cn (m) chr 1

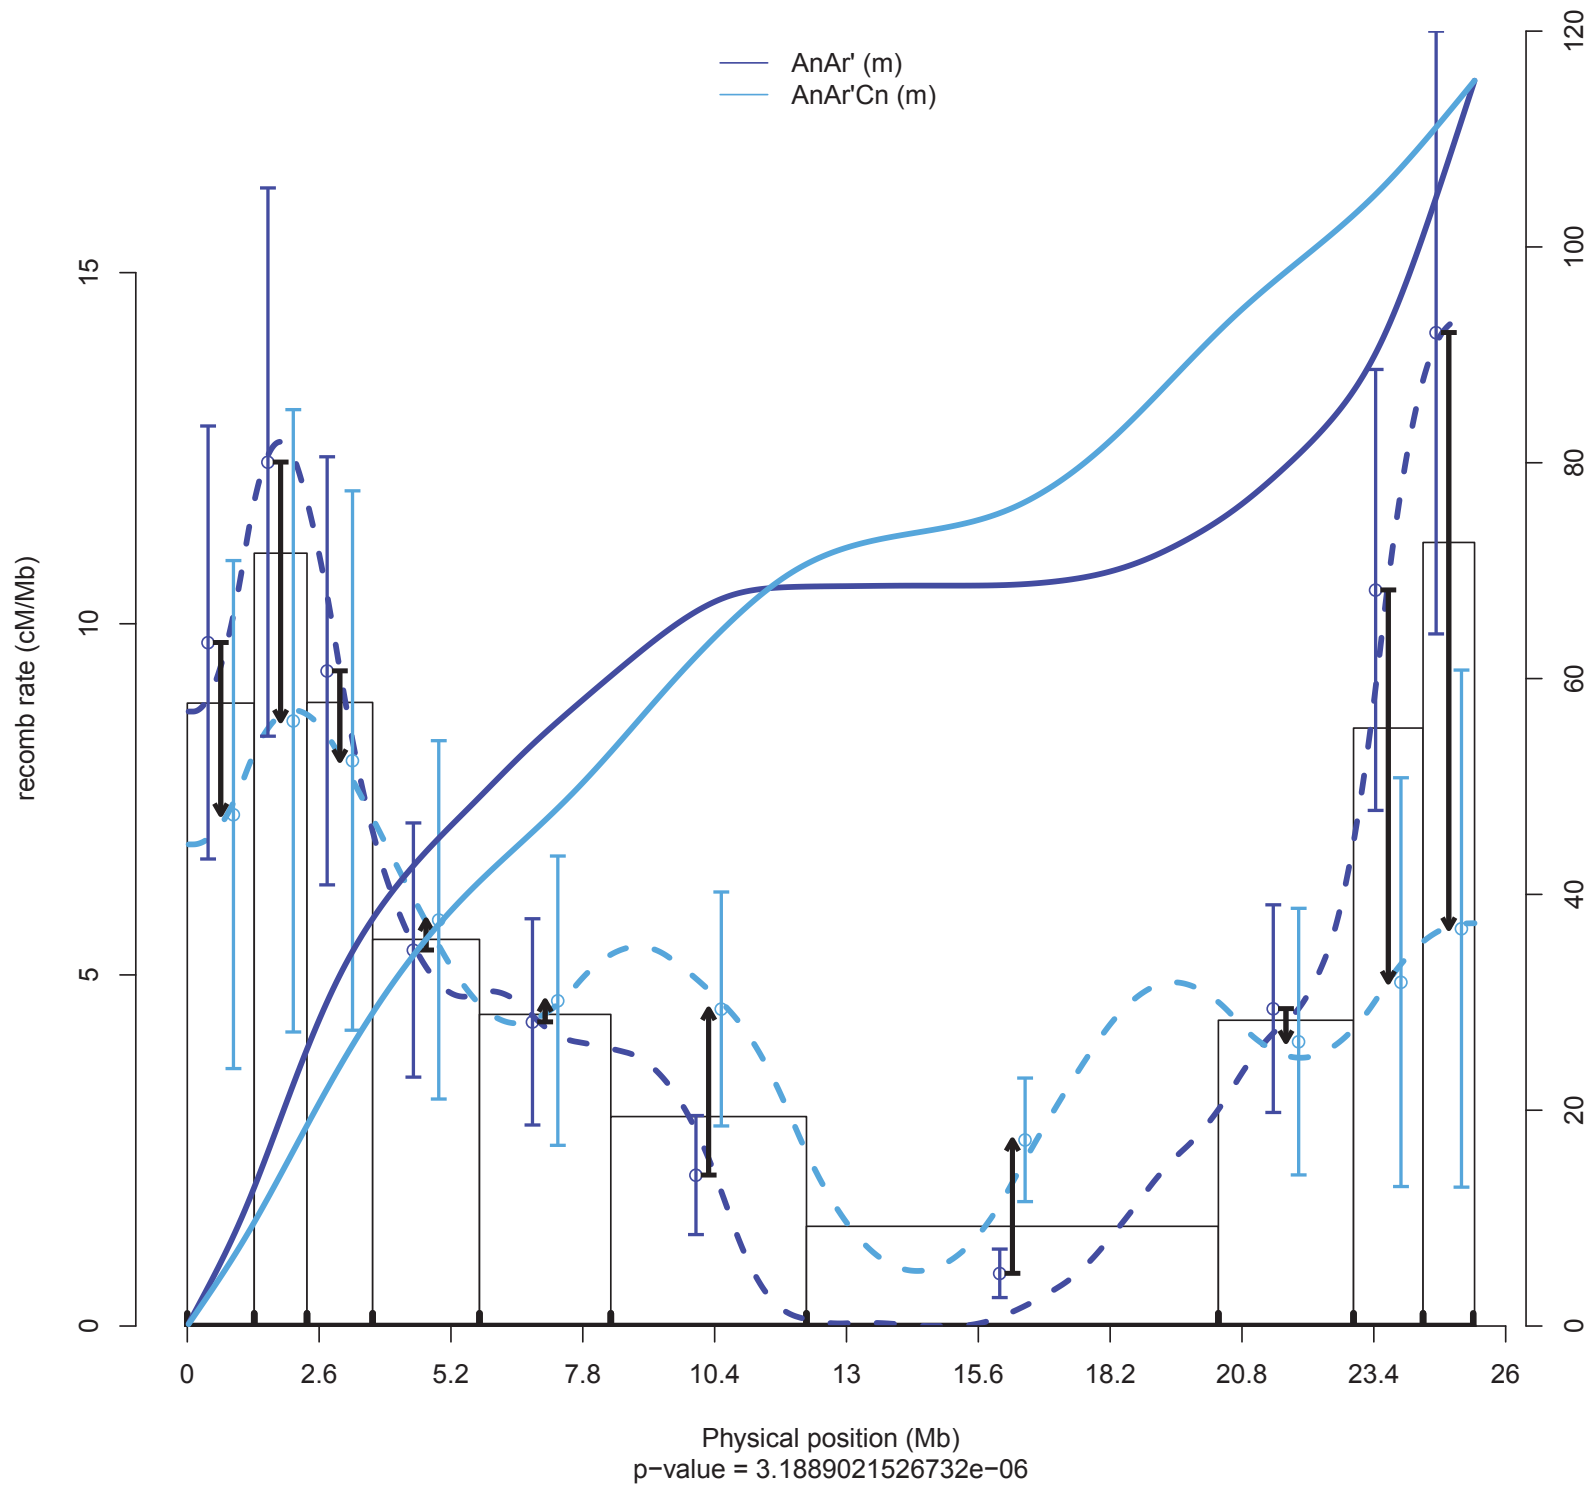

# AnAr' (m) - AnAr'Cn (m) chr 2

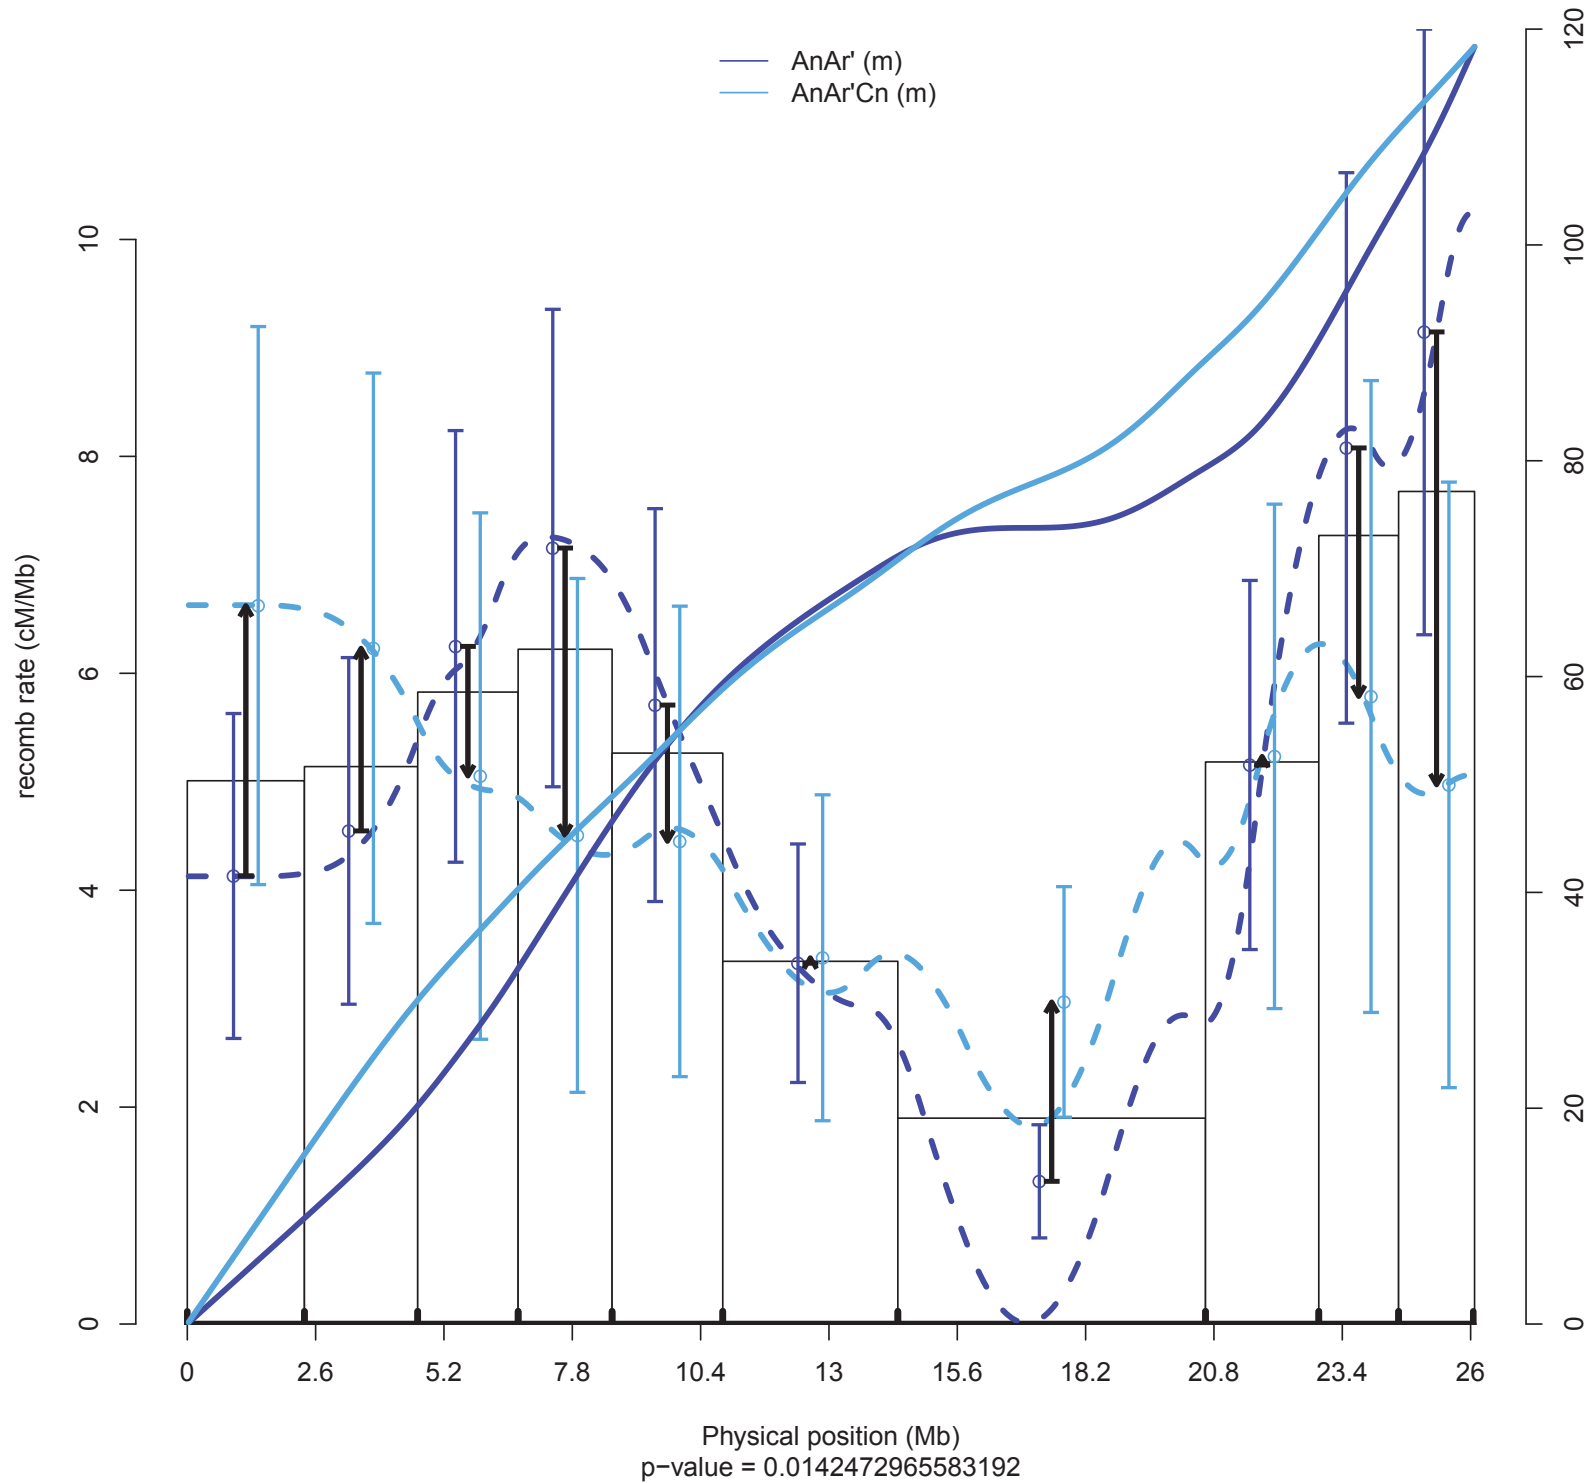

### AnAr' (m) - AnAr'Cn (m) chr 3

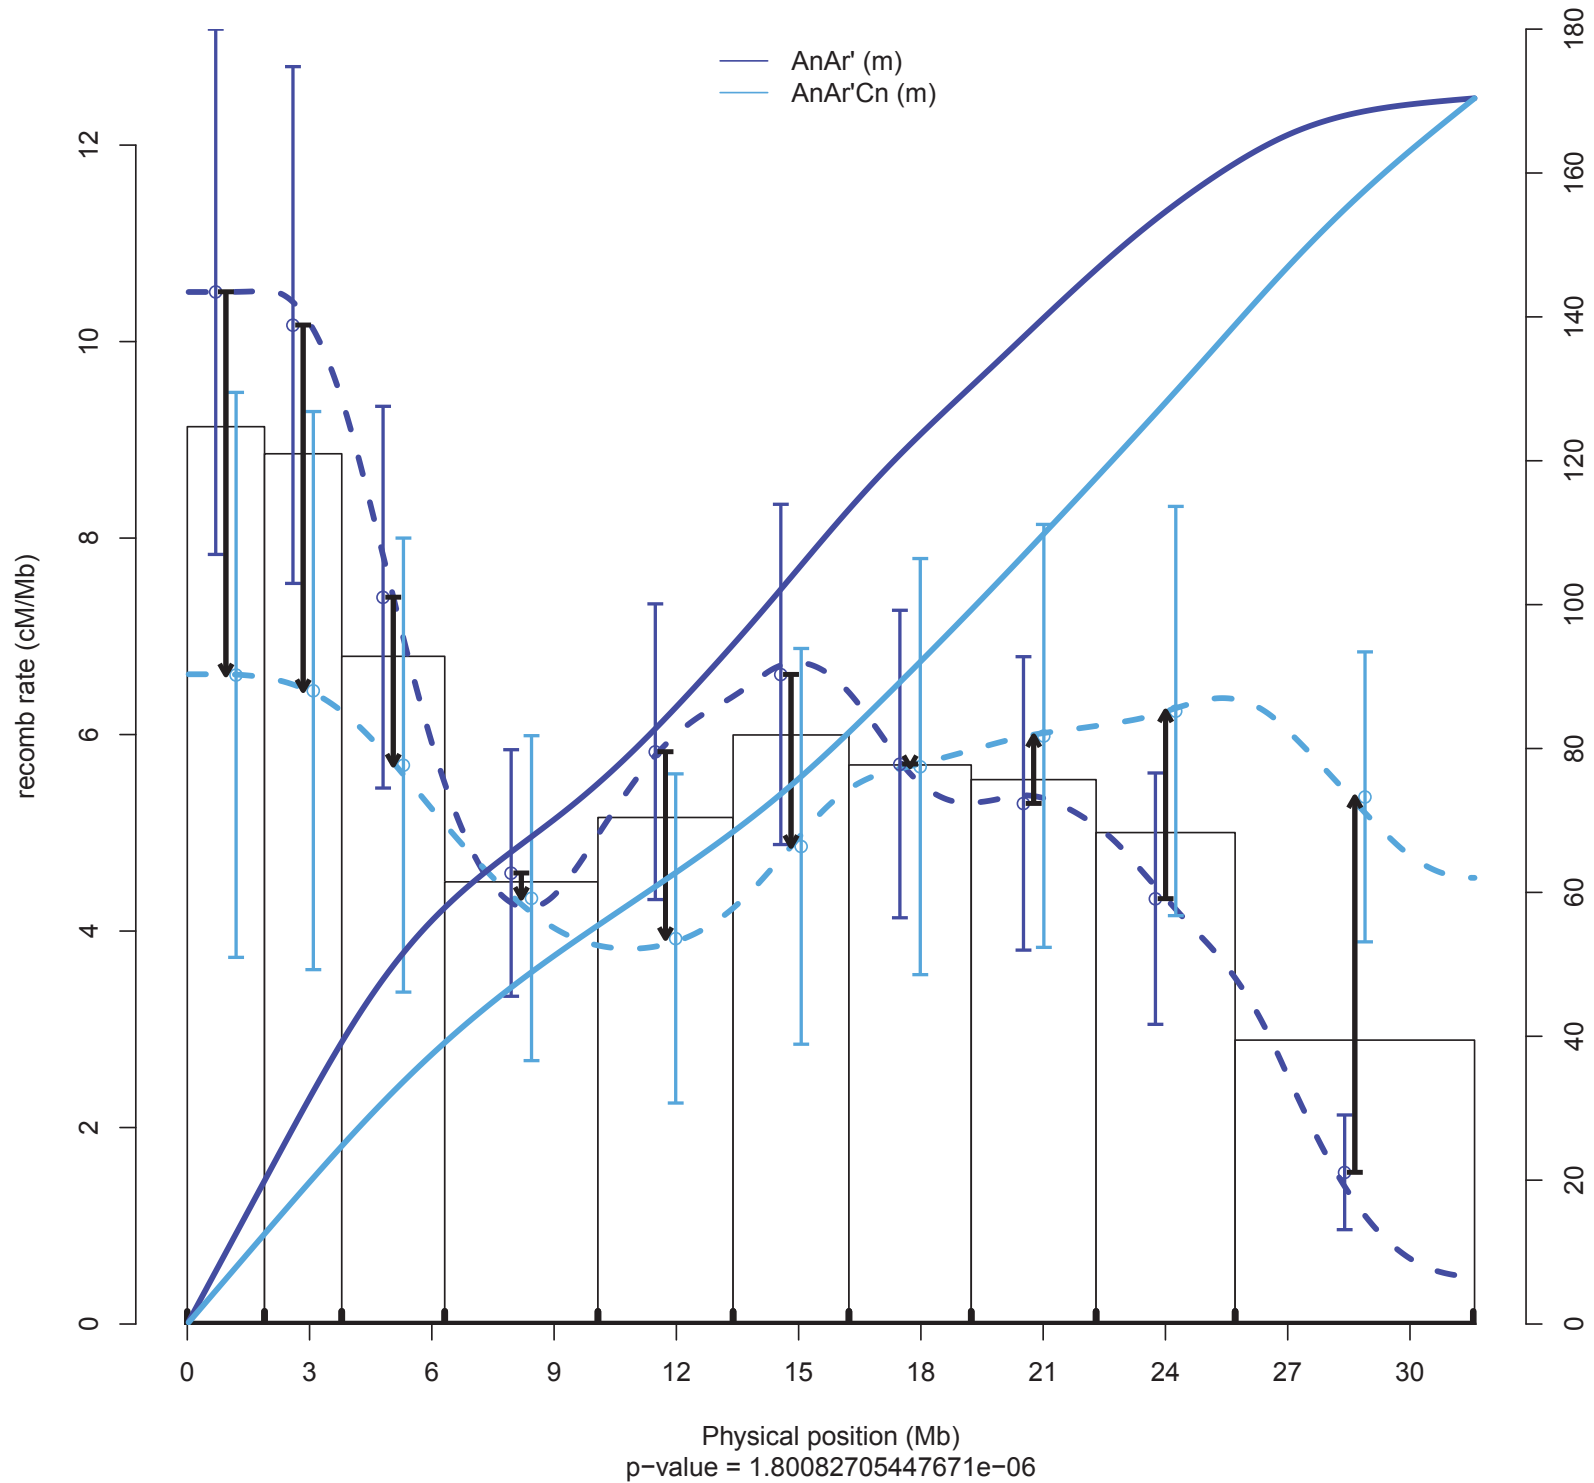

# AnAr' (m) - AnAr'Cn (m) chr 4

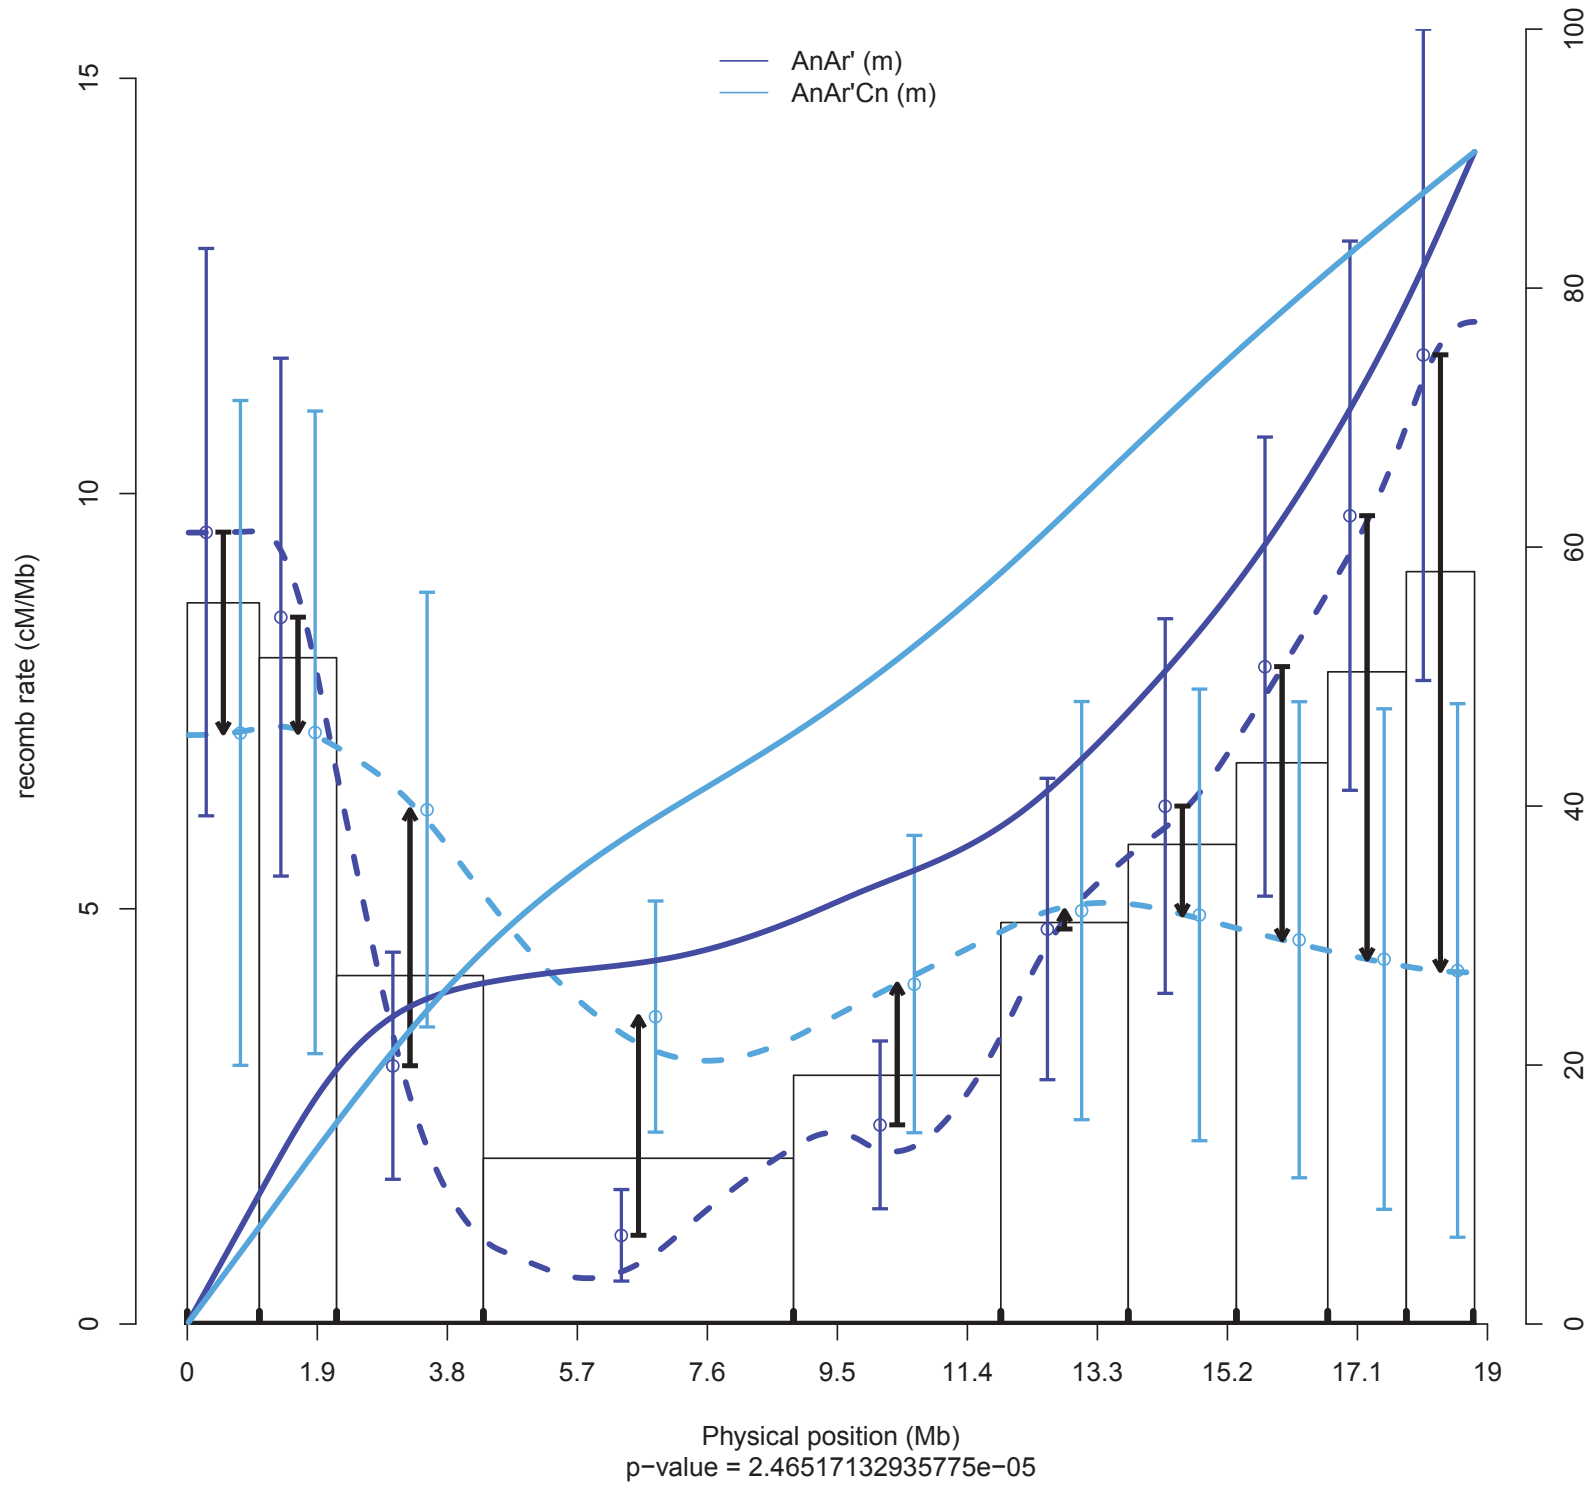



# AnAr' (m) - AnAr'Cn (m) chr 5

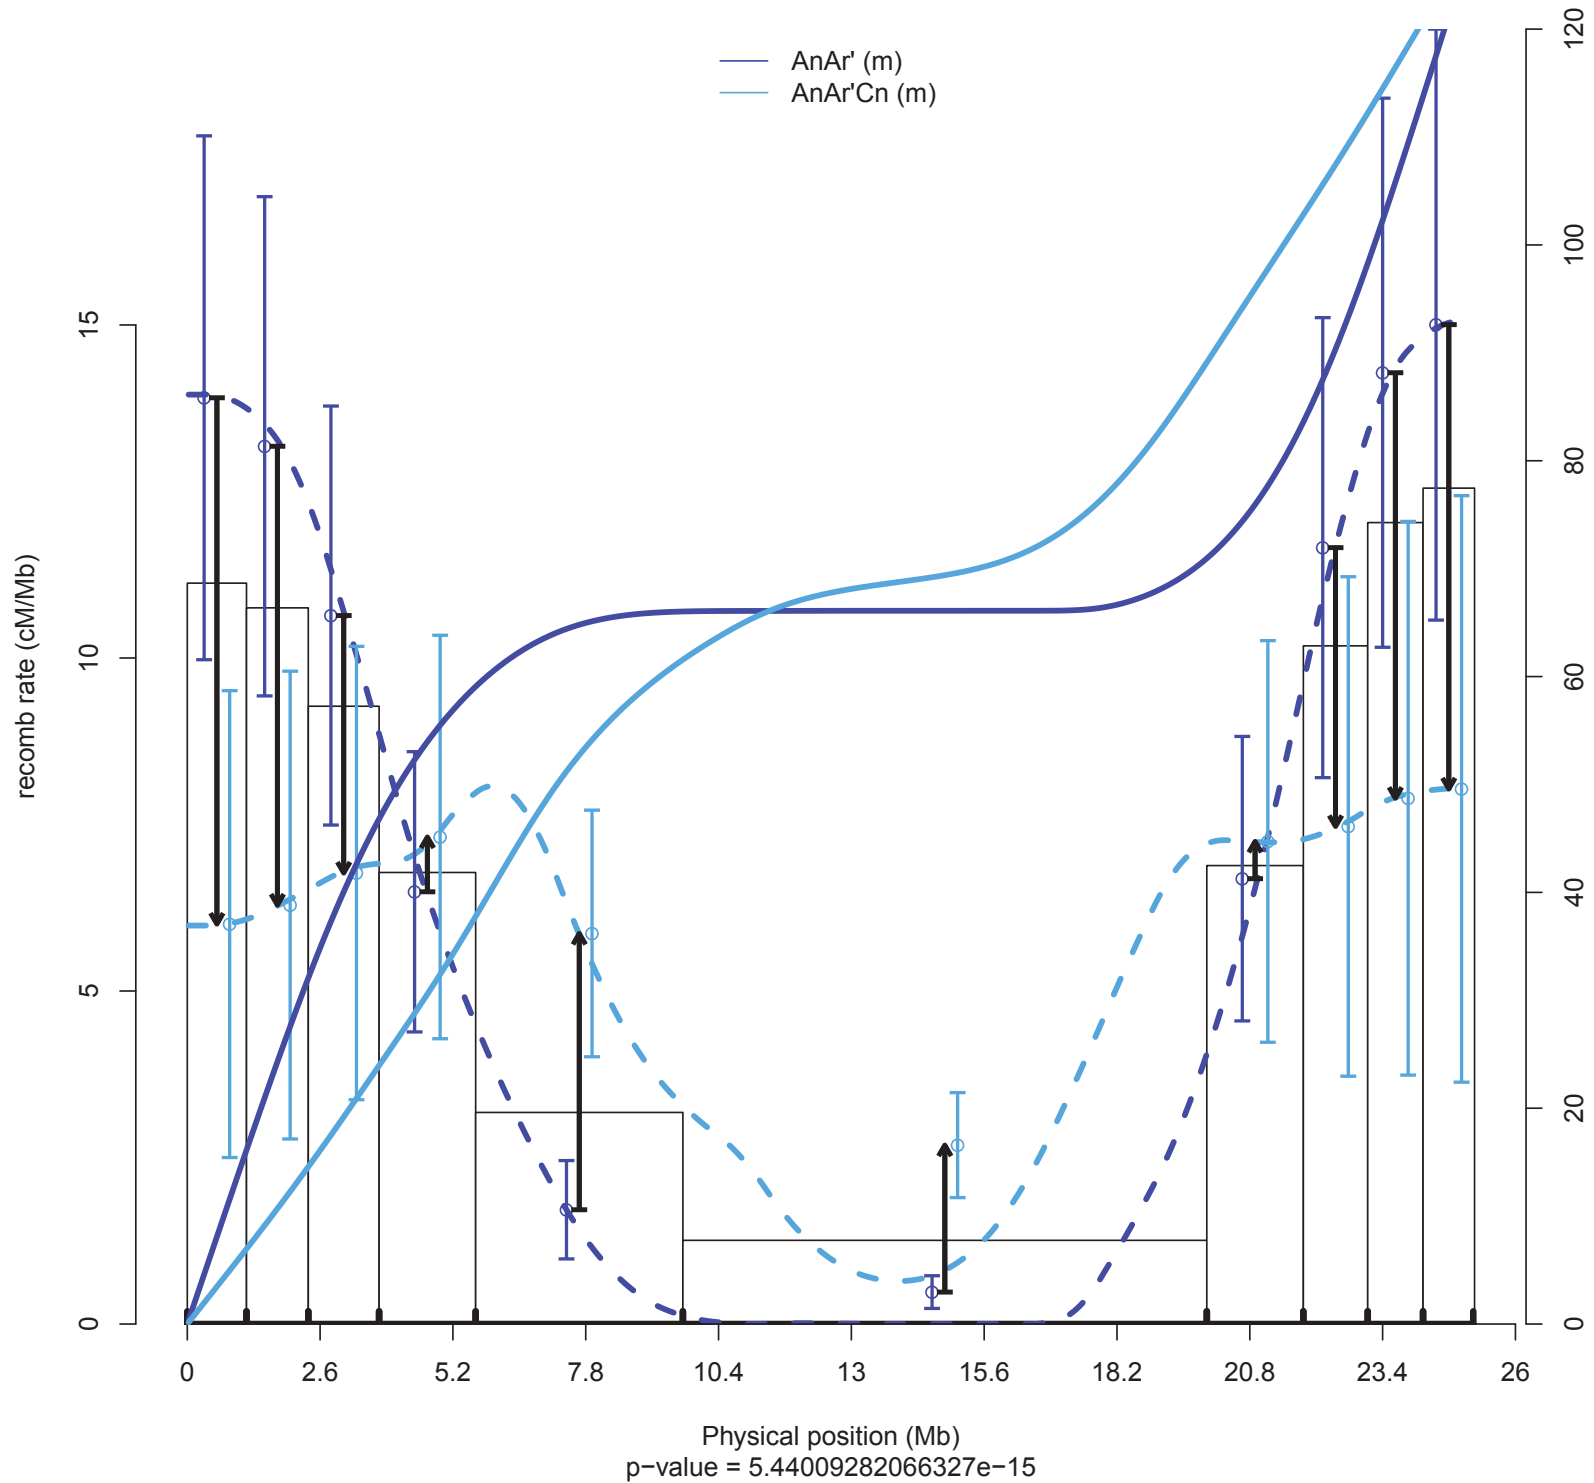

# AnAr' (m) - AnAr'Cn (m) chr 6

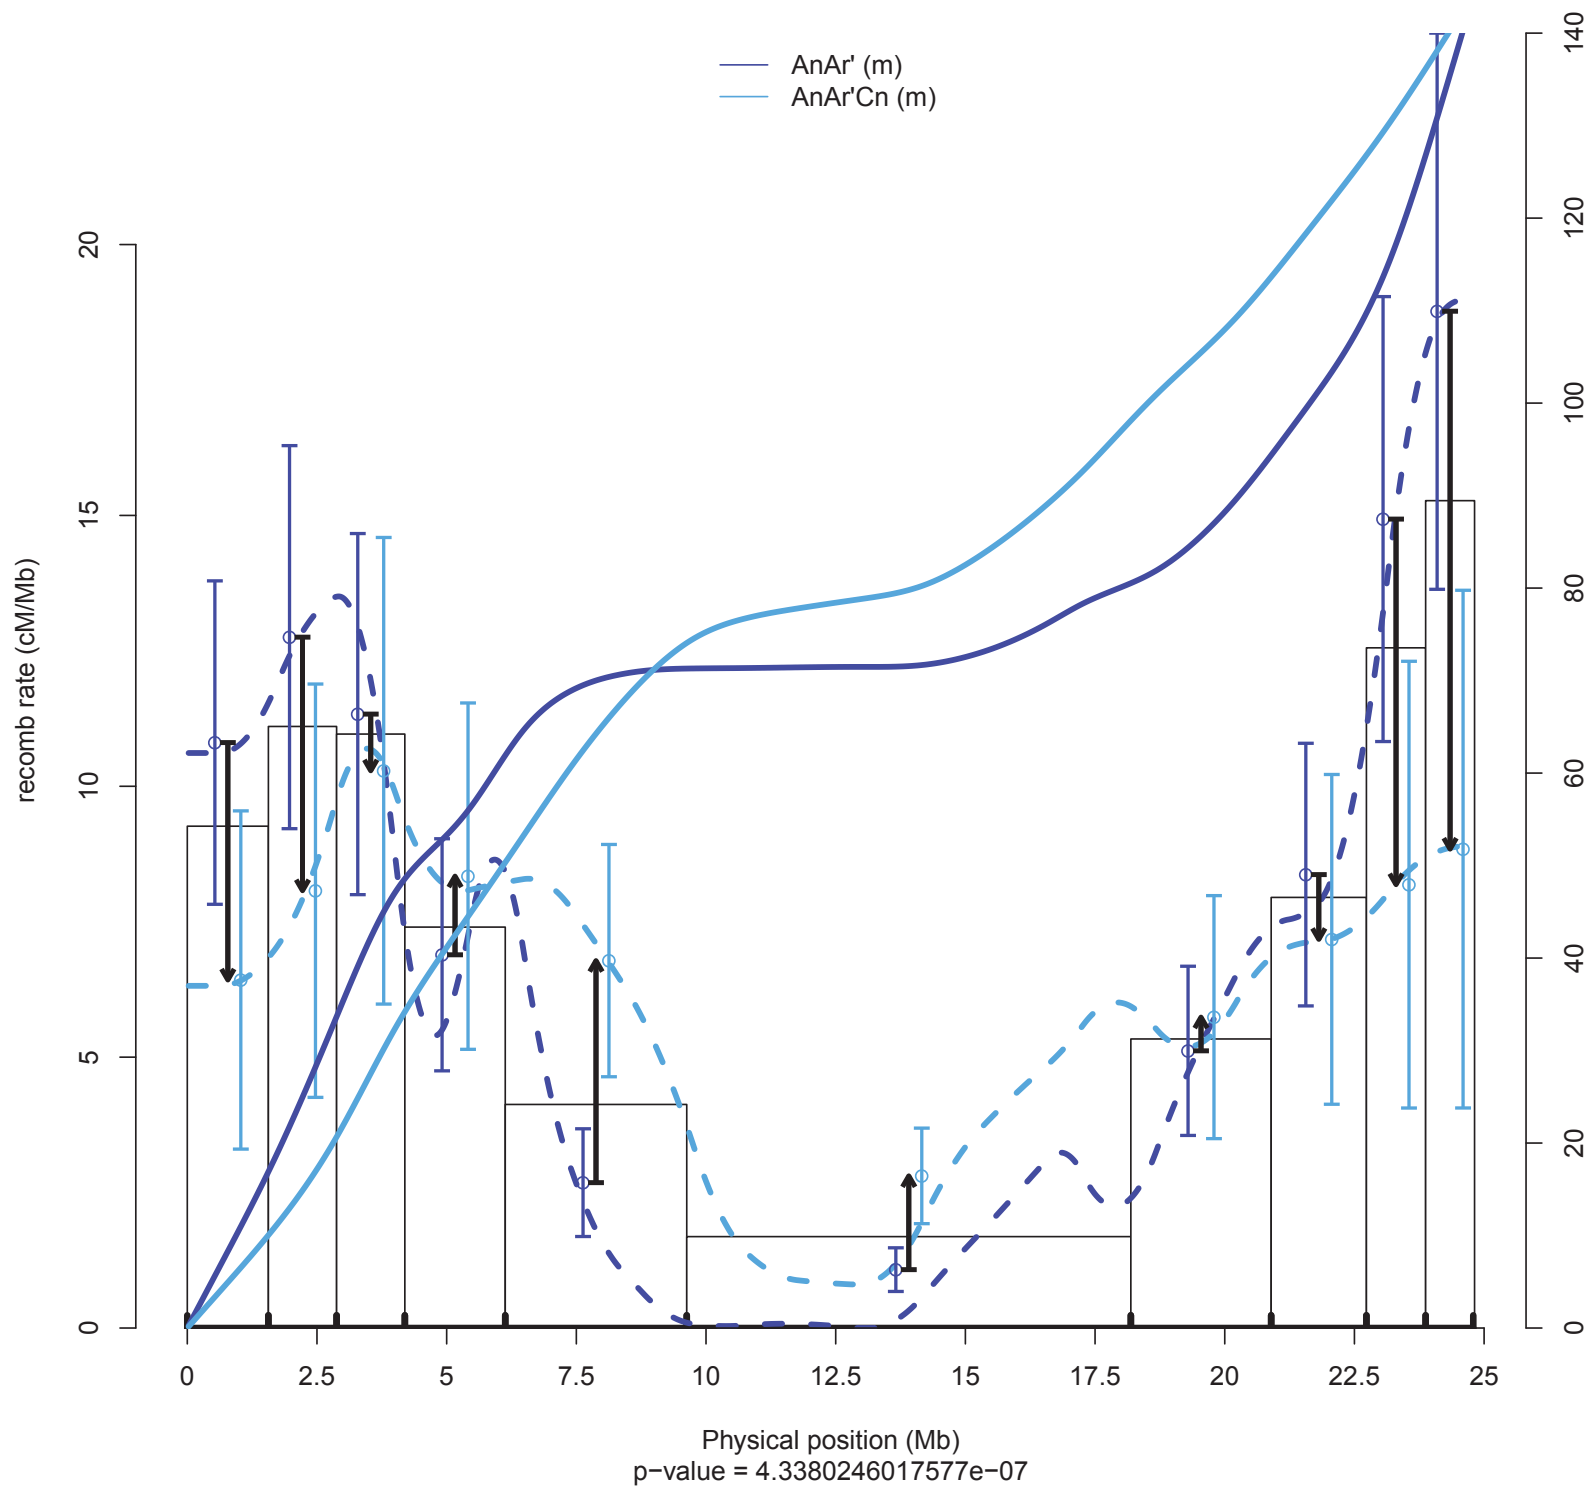

# AnAr' (m) – AnAr'Cn (m) chr 7

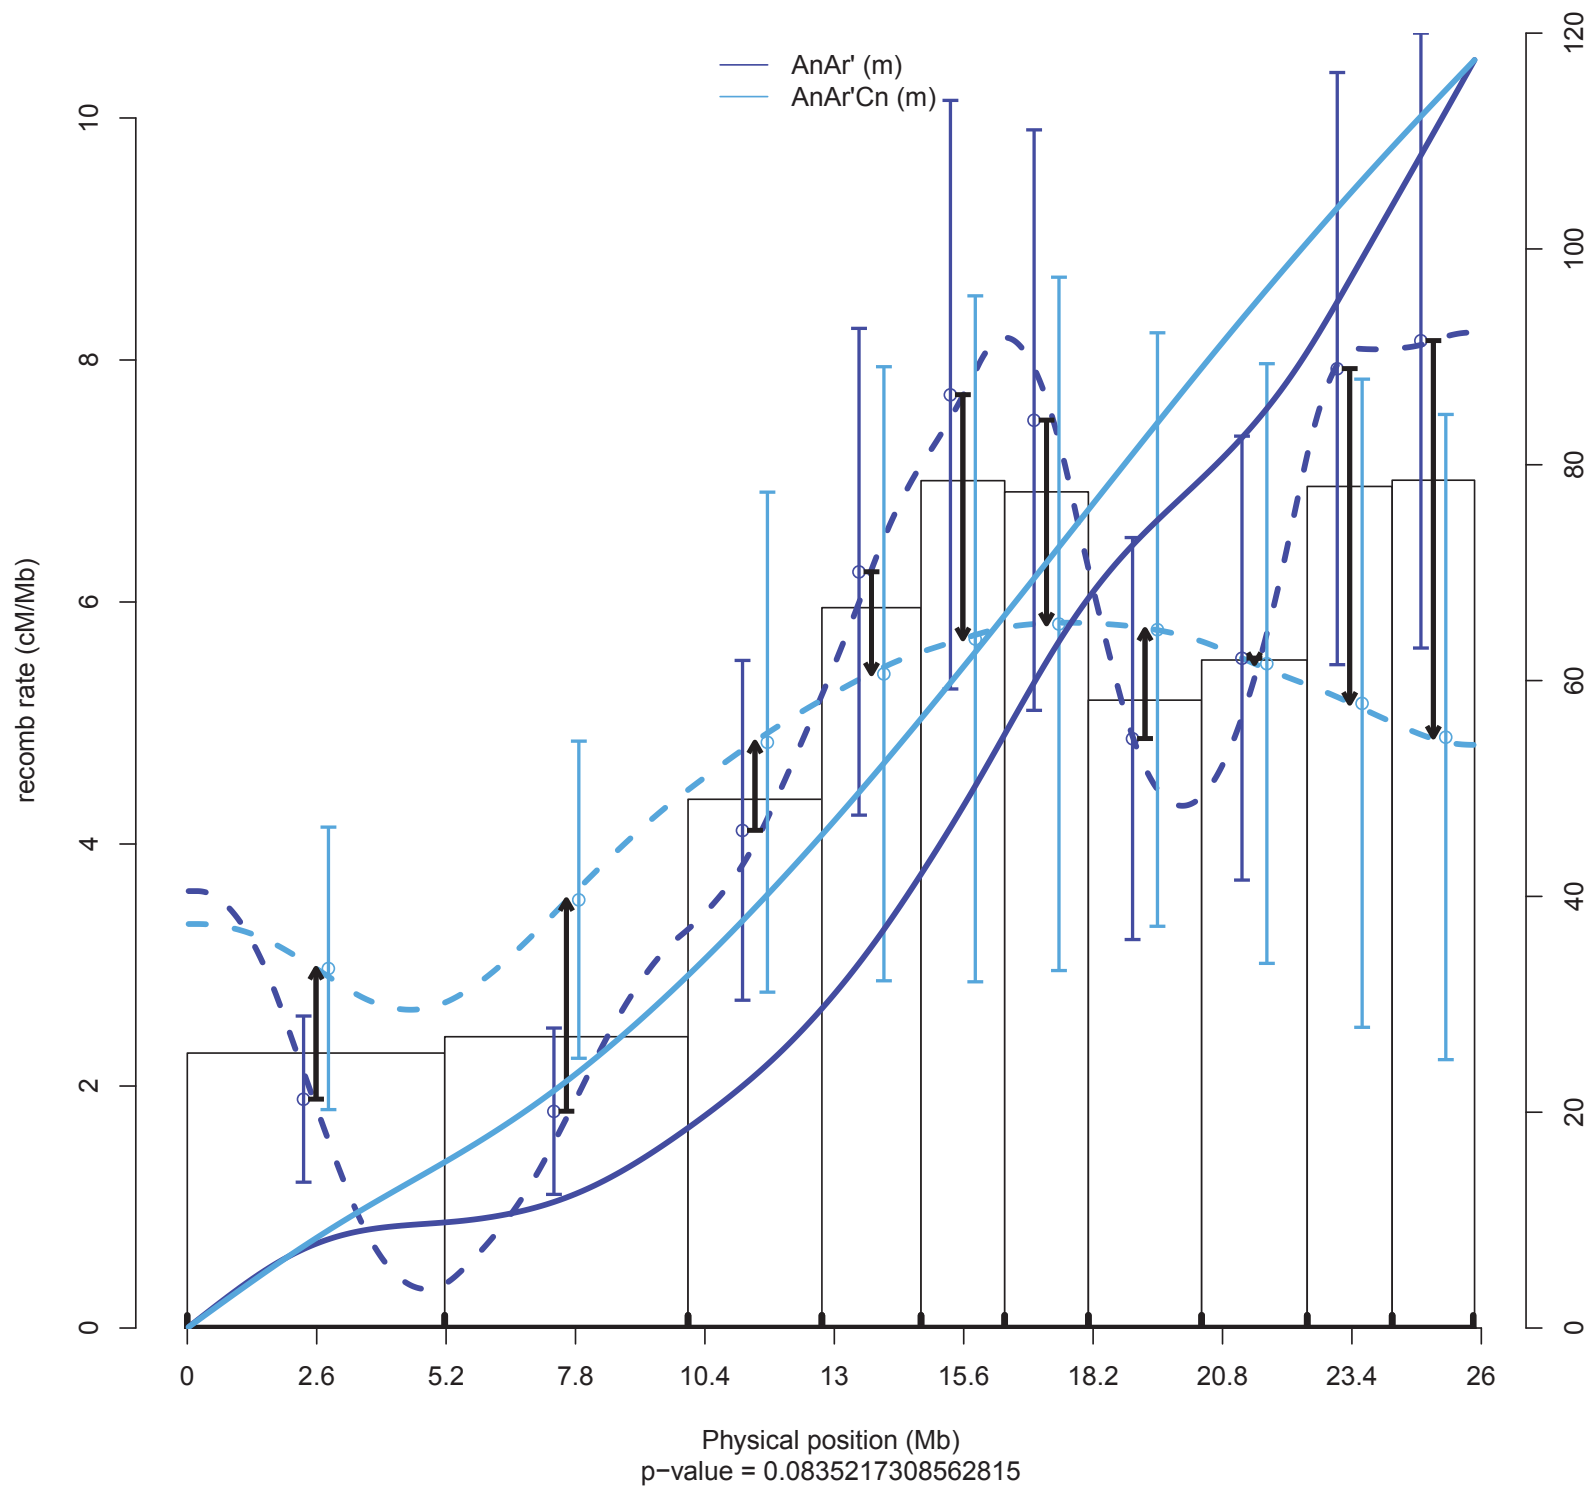

# AnAr' (m) - AnAr'Cn (m) chr 8

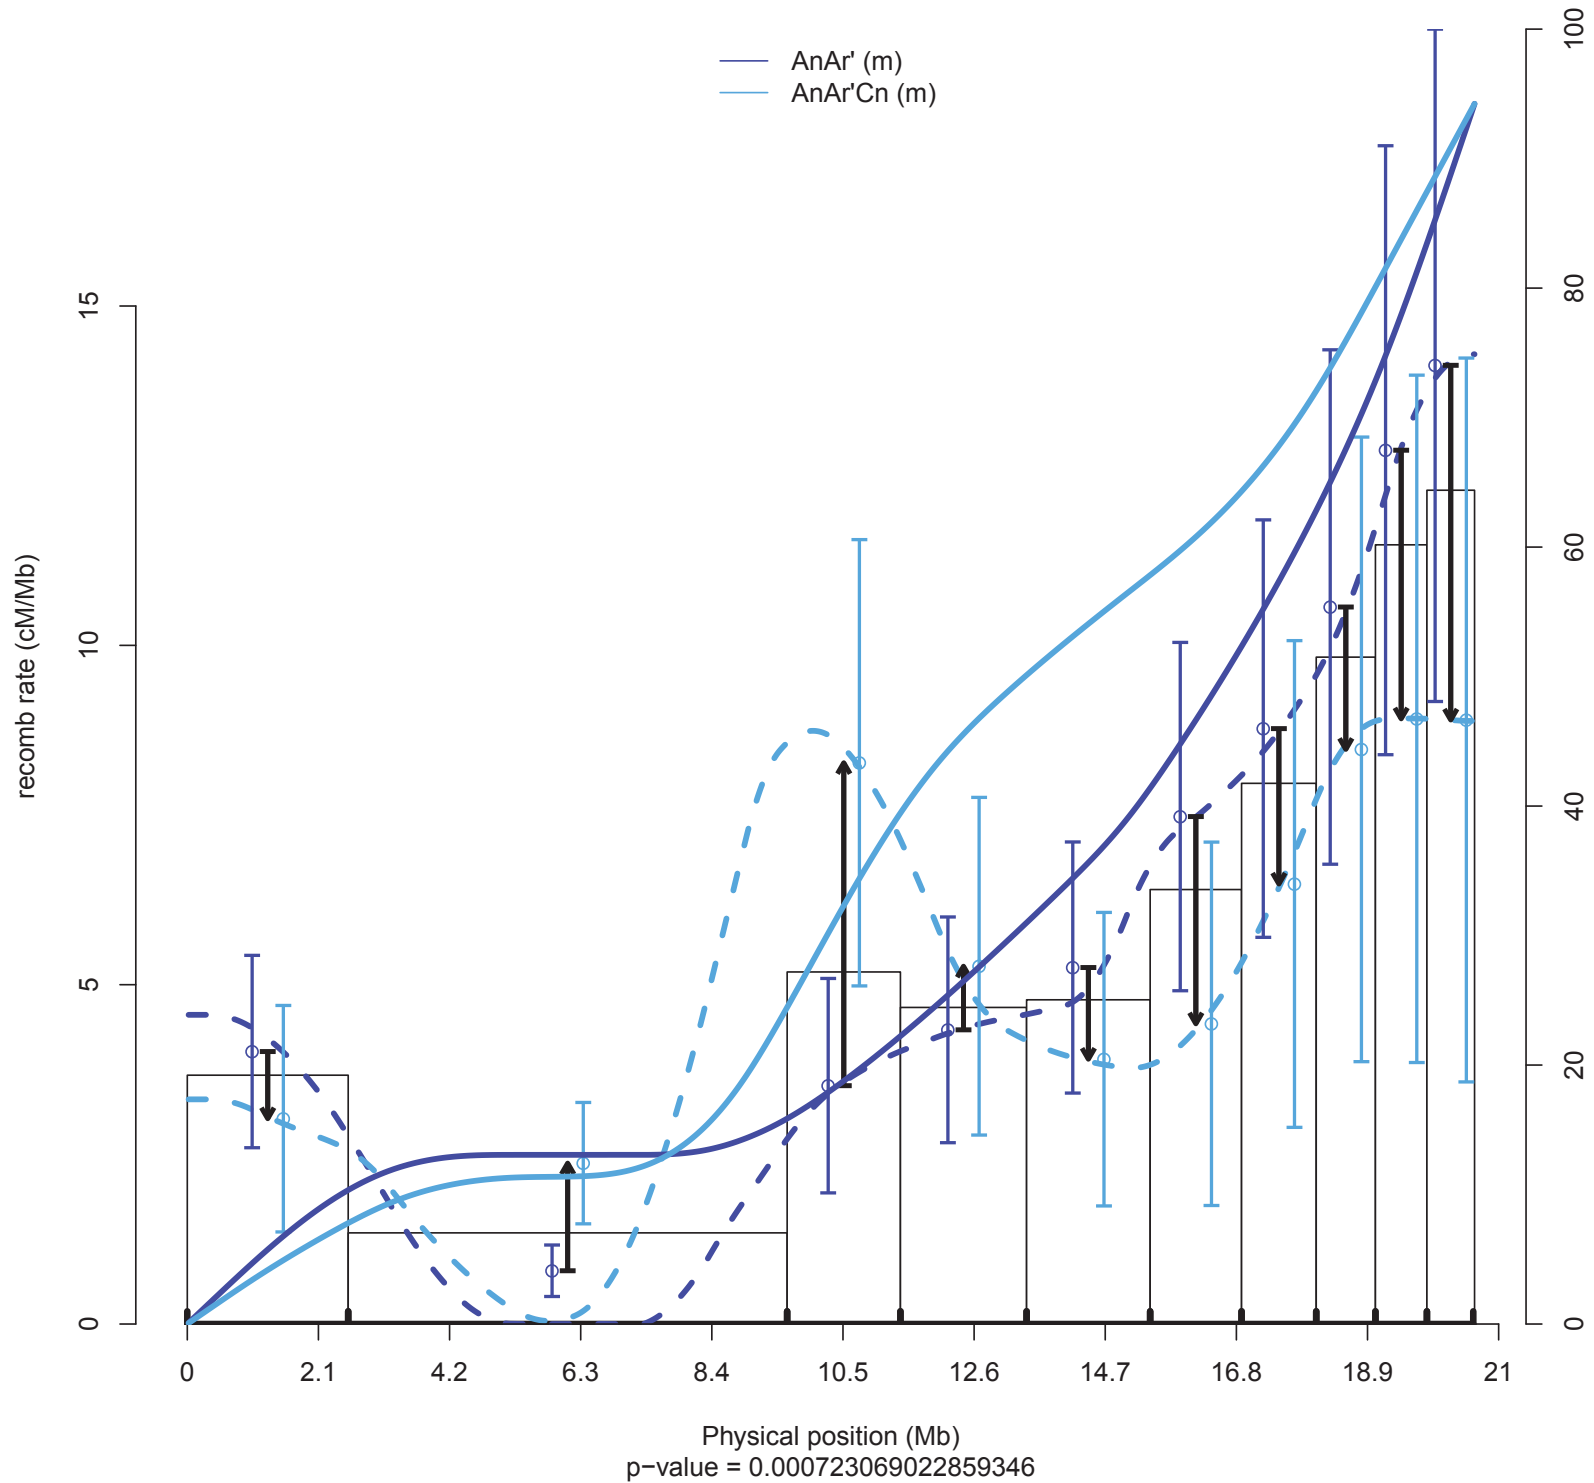

# AnAr' (m) – AnAr'Cn (m) chr 9

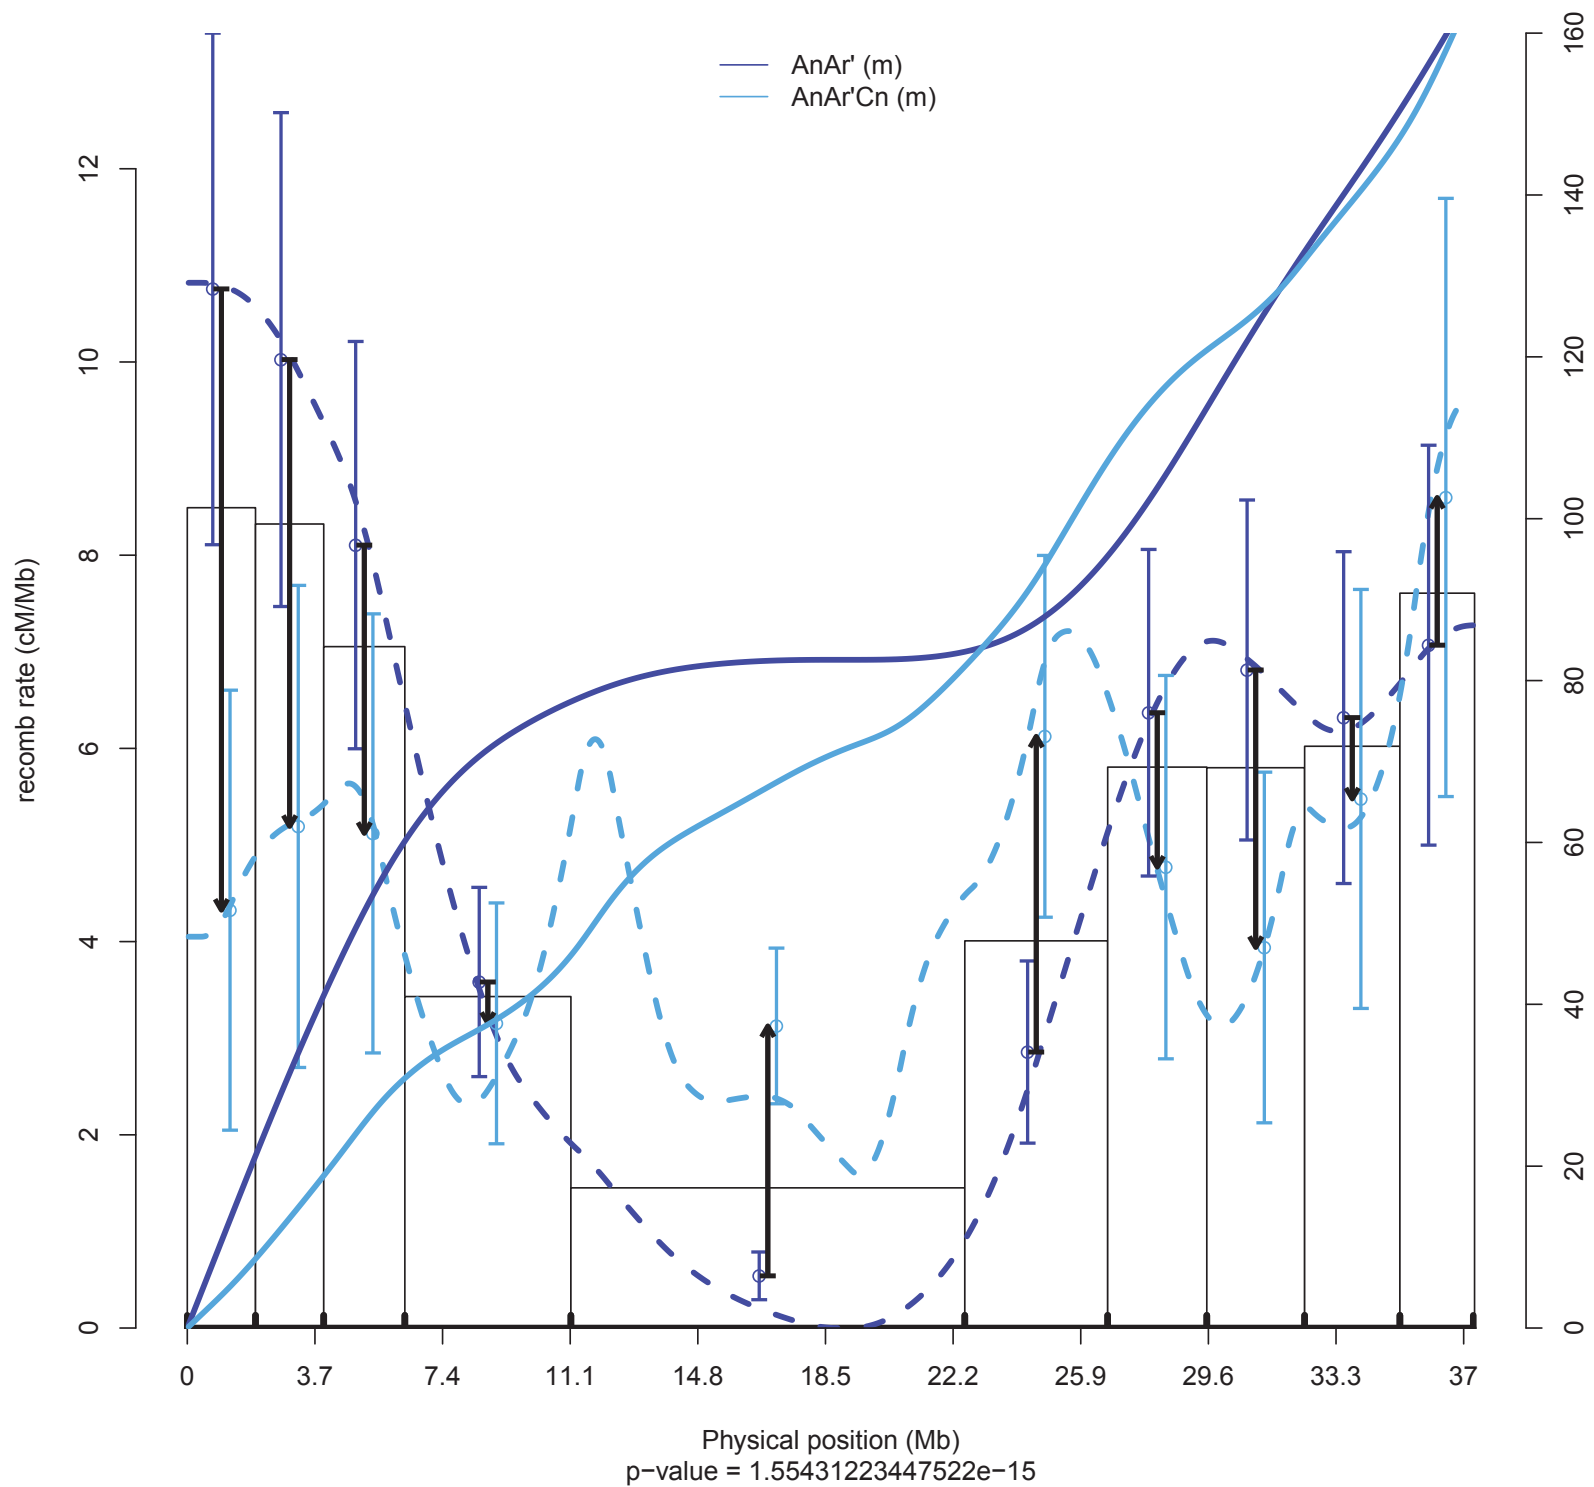

# AnAr' (m) - AnAr'Cn (m) chr 10

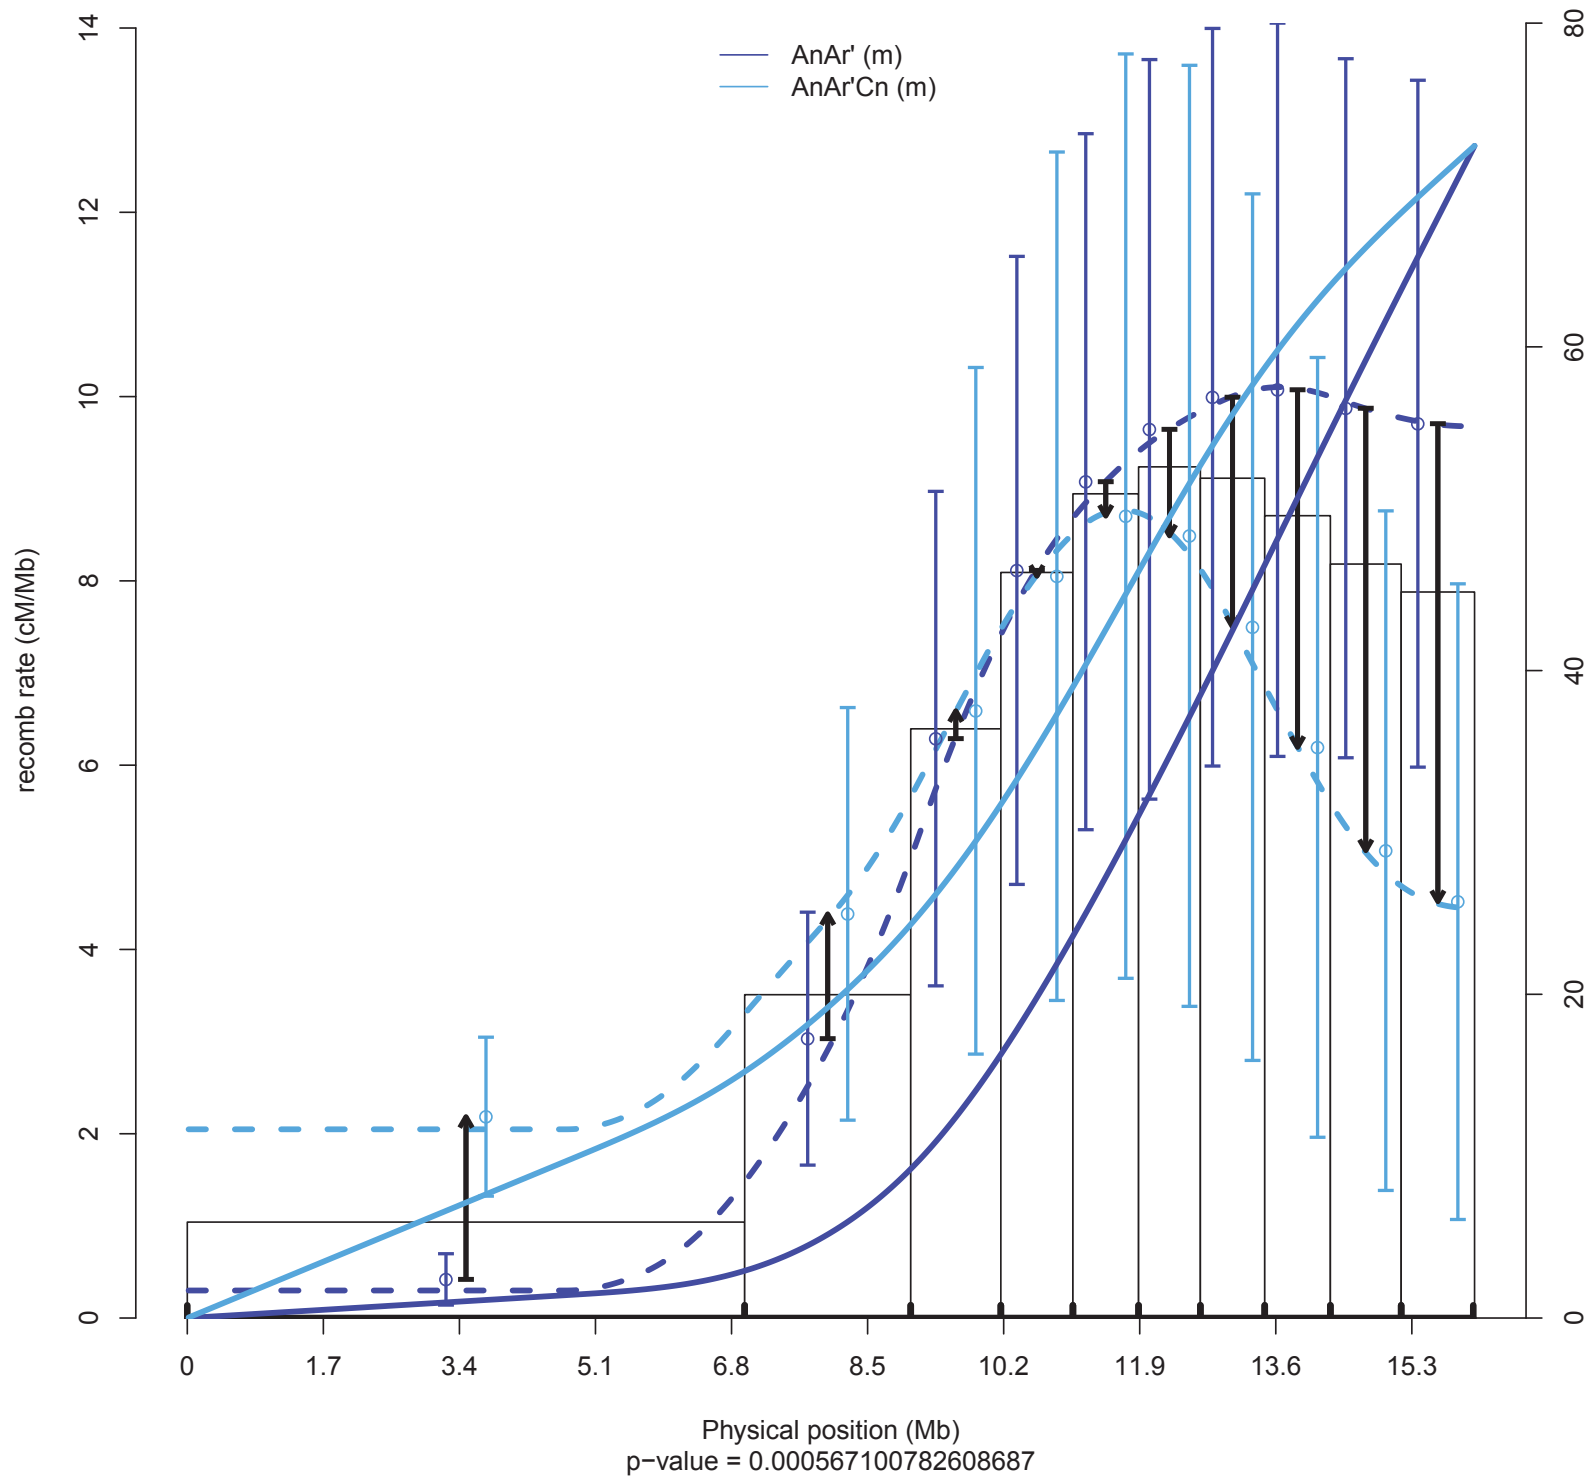

Supplement: pgen.1006794.s004.pdf [file pgen.1006794.s004.pdf]
