# Supplementary material for: Amplifying recombination genome-wide and reshaping crossover landscapes in Brassicas
Source: PubMed Central journal article supplement (PMC5444851; doi:10.1371/journal.pgen.1006794), 2017-05-11

# AnAr' (f) - AnAr' (m) chr 1

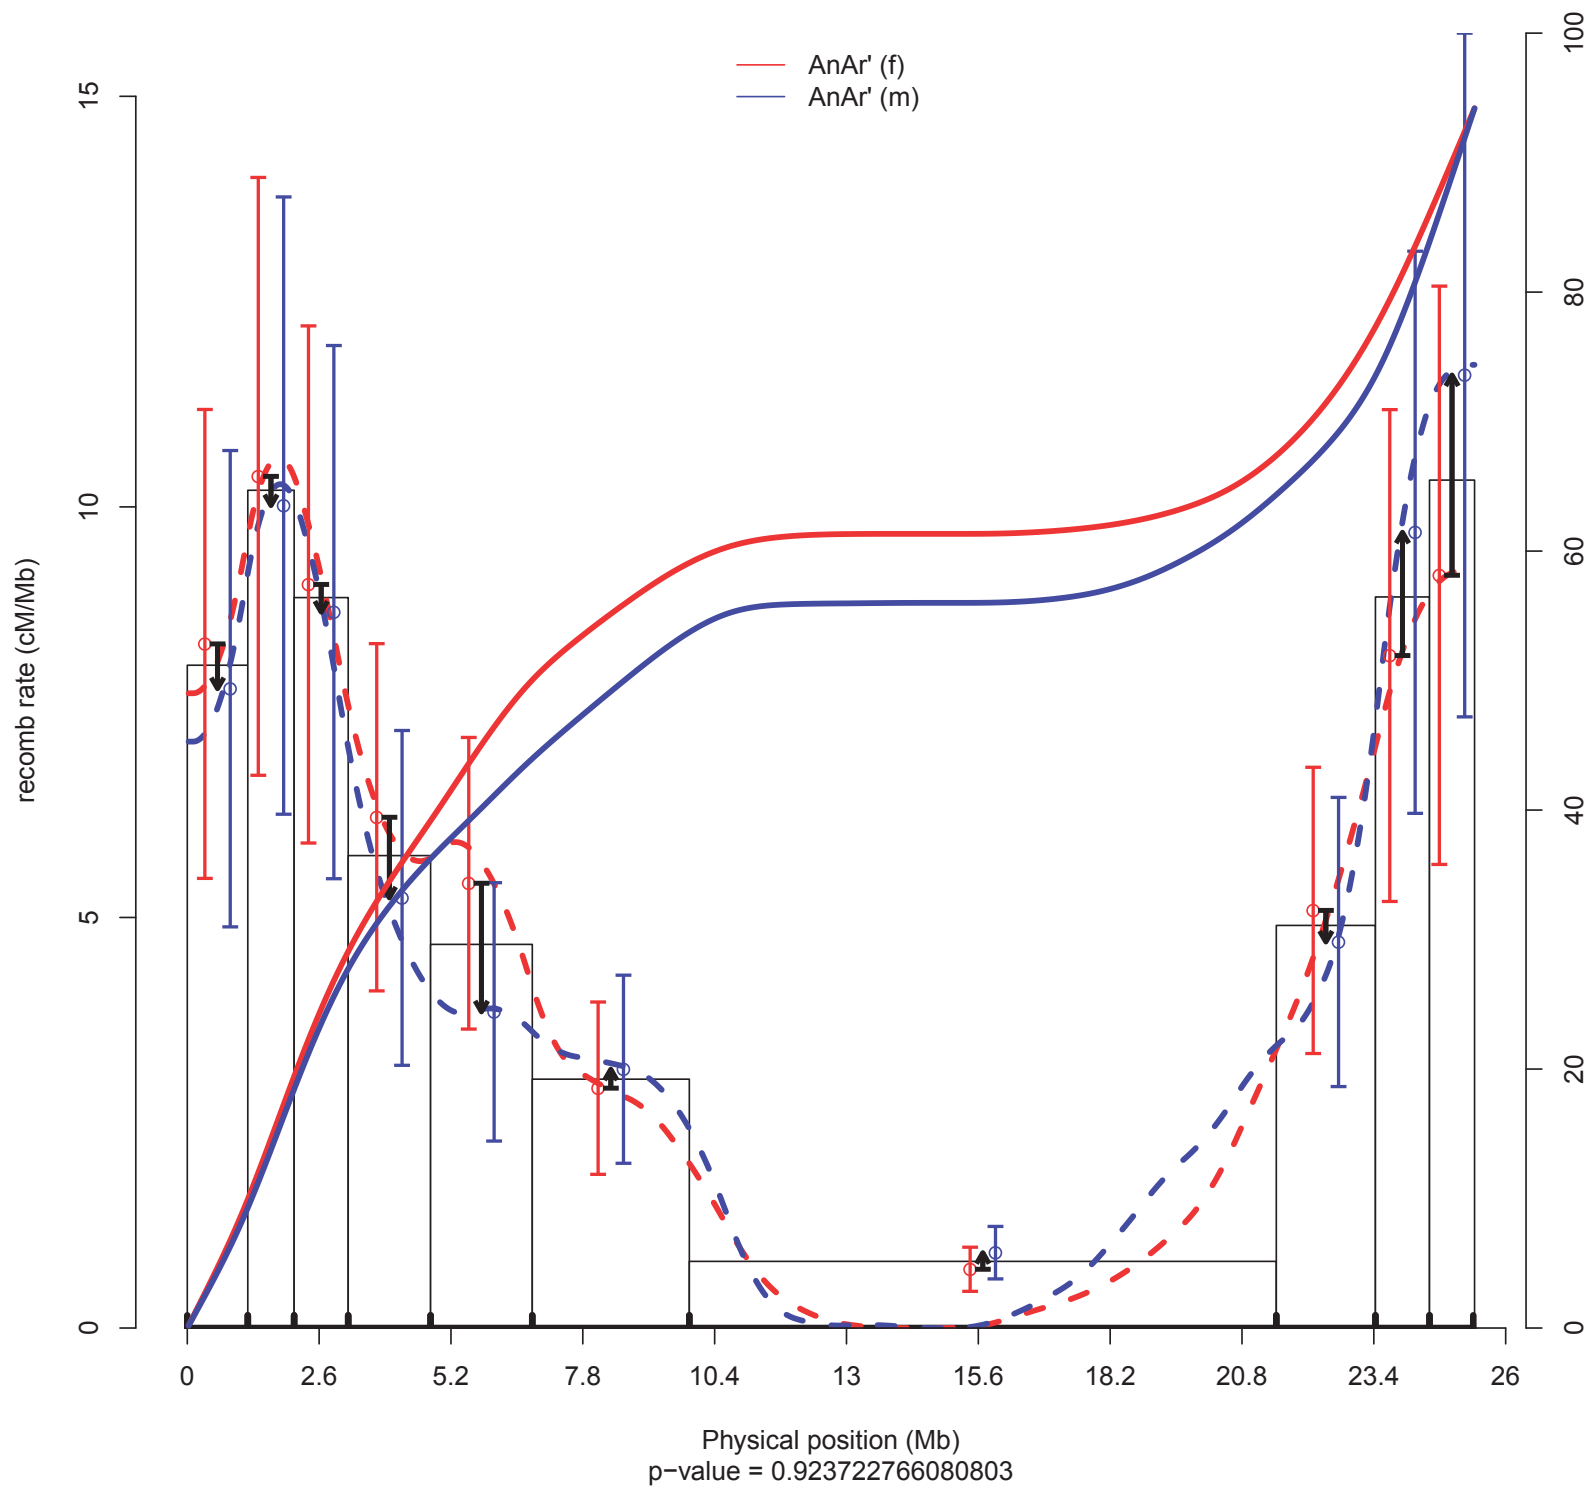

# AnAr' (f) - AnAr' (m) chr 2

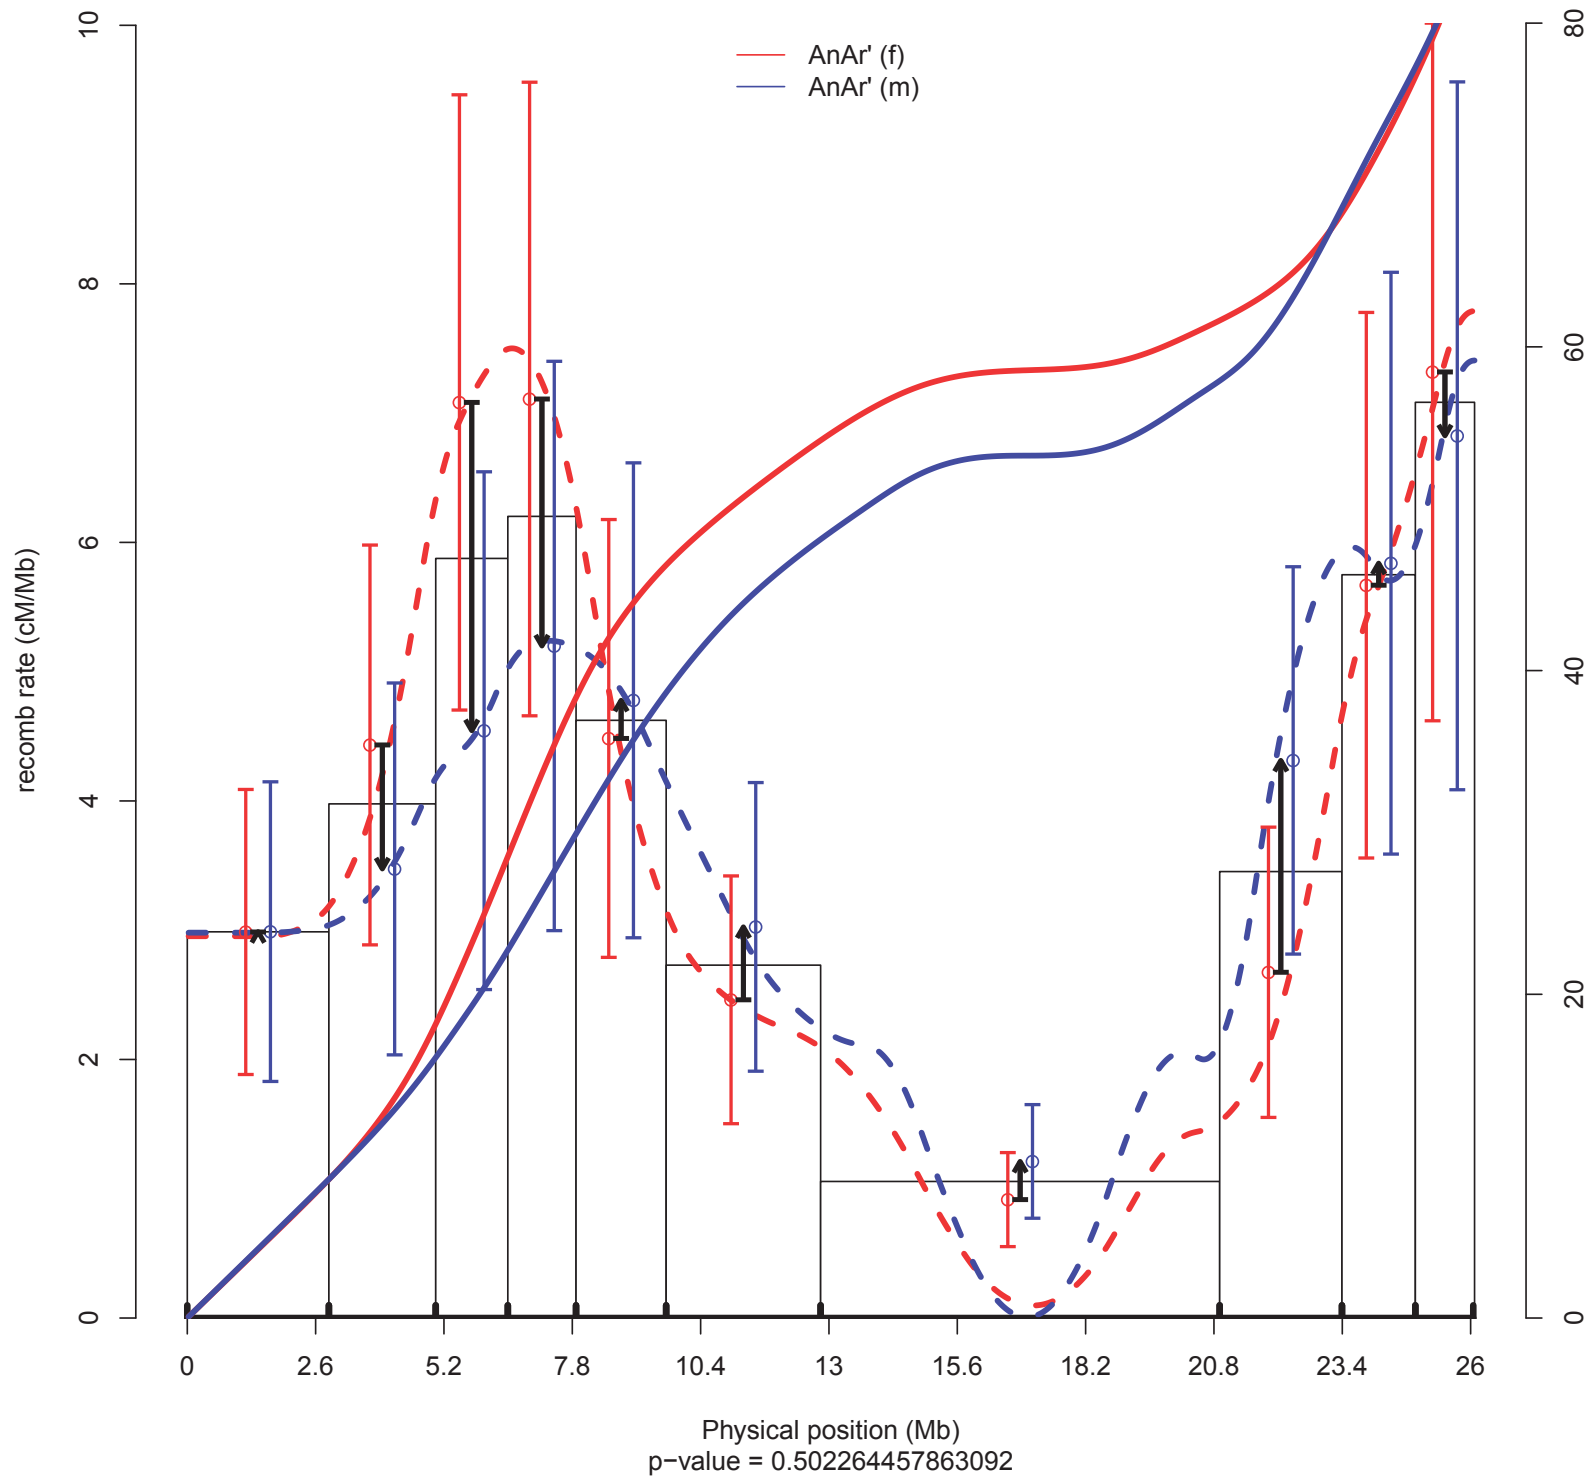

### AnAr' (f) - AnAr' (m) chr 3

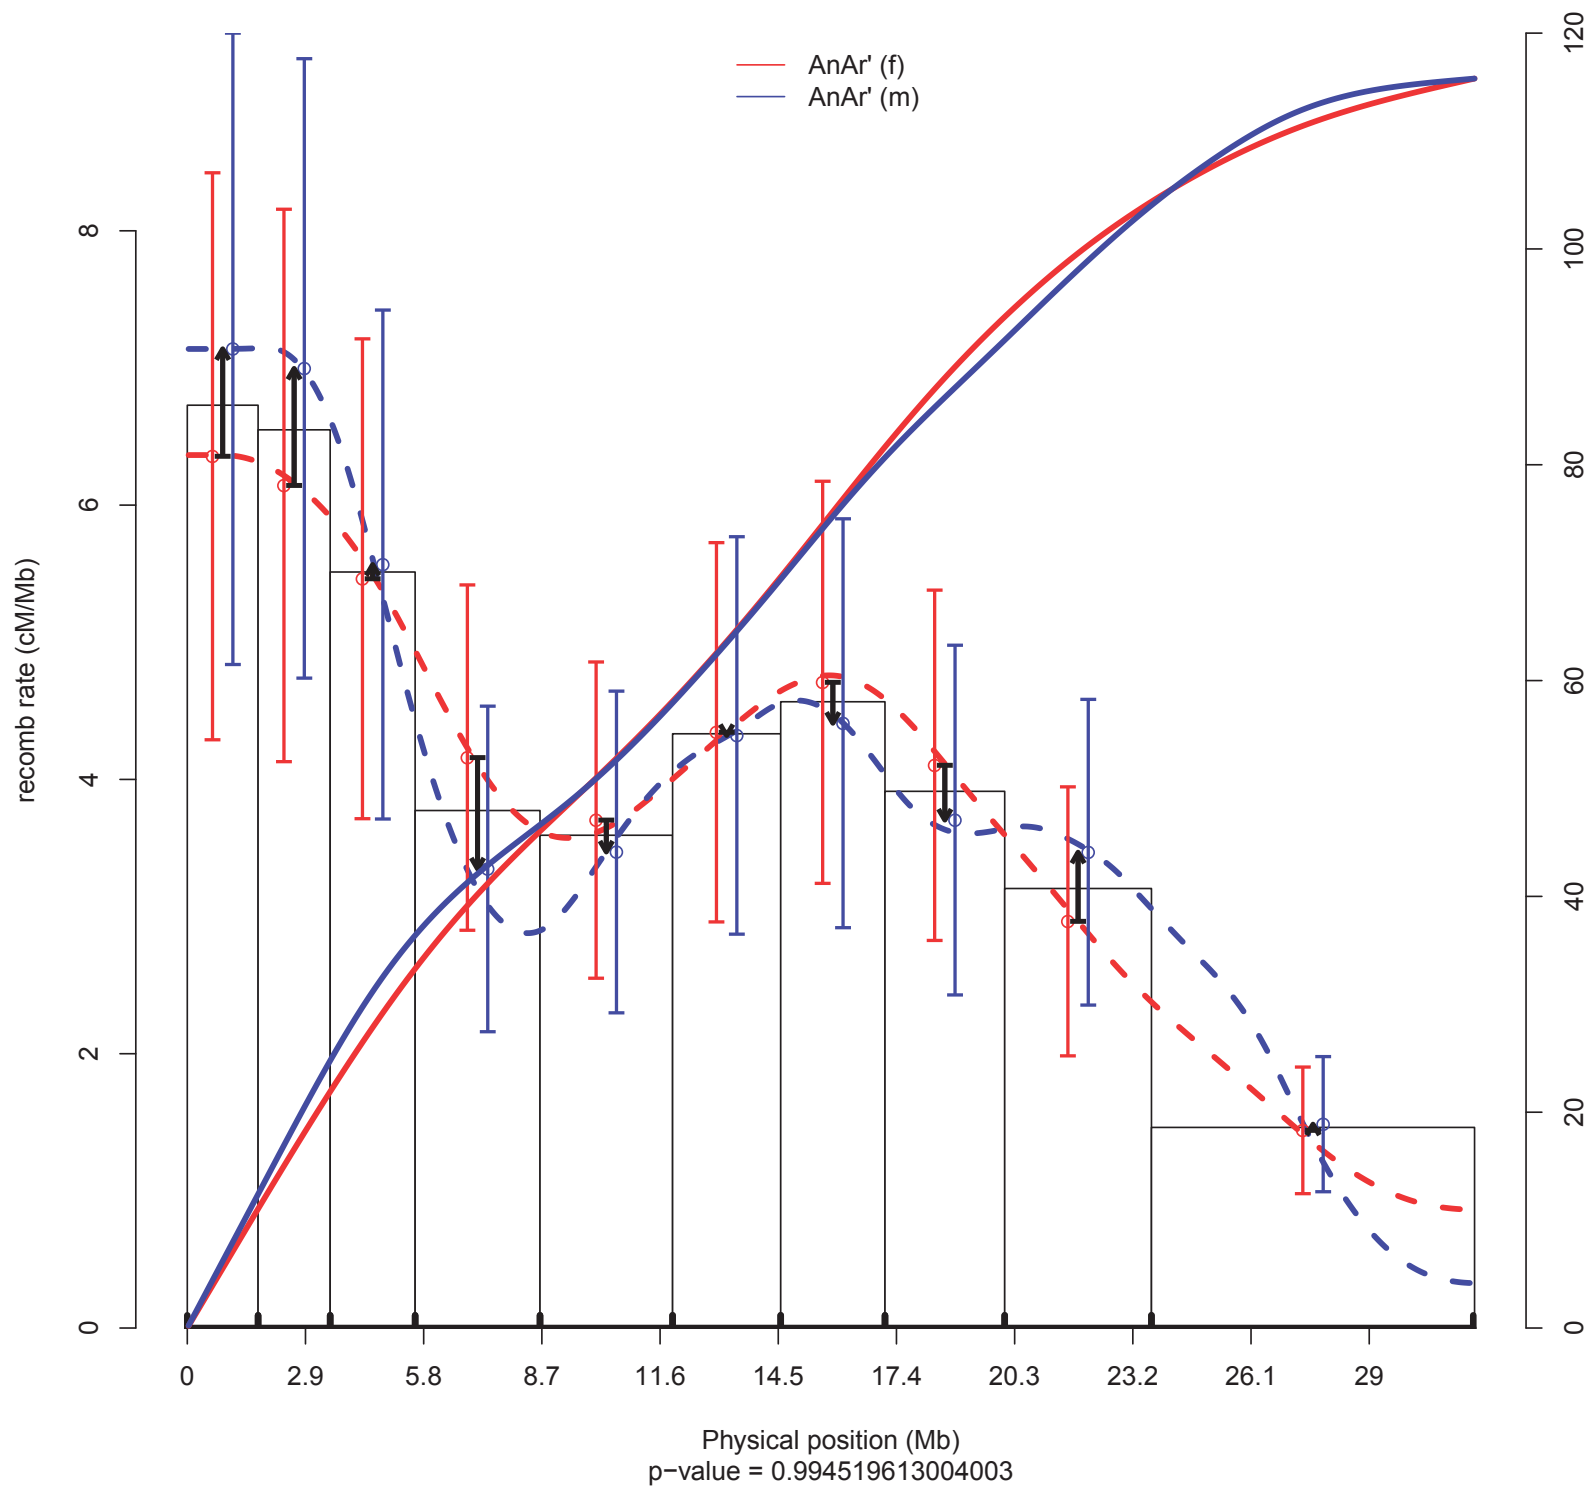

# AnAr' (f) - AnAr' (m) chr 4

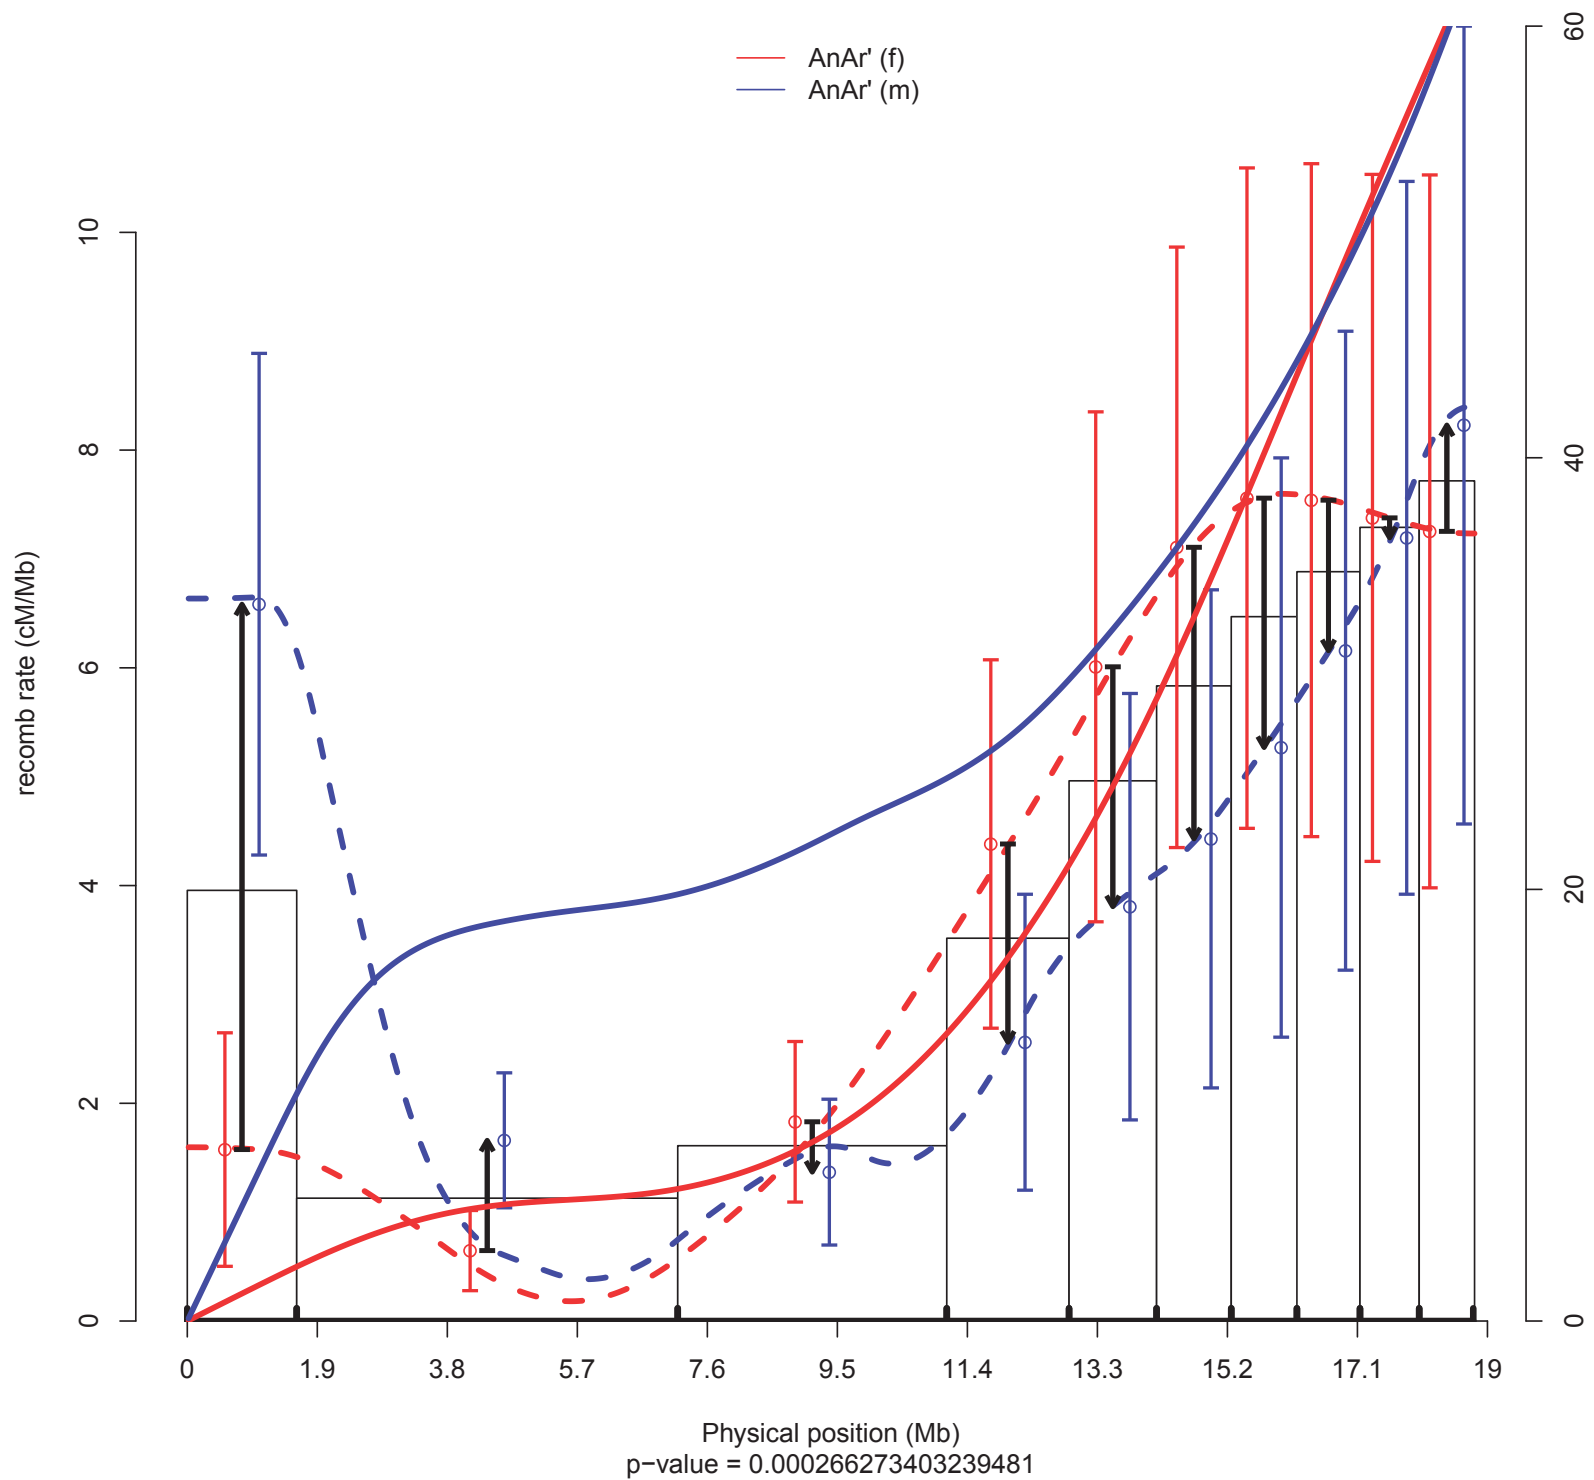

# AnAr' (f) - AnAr' (m) chr 5

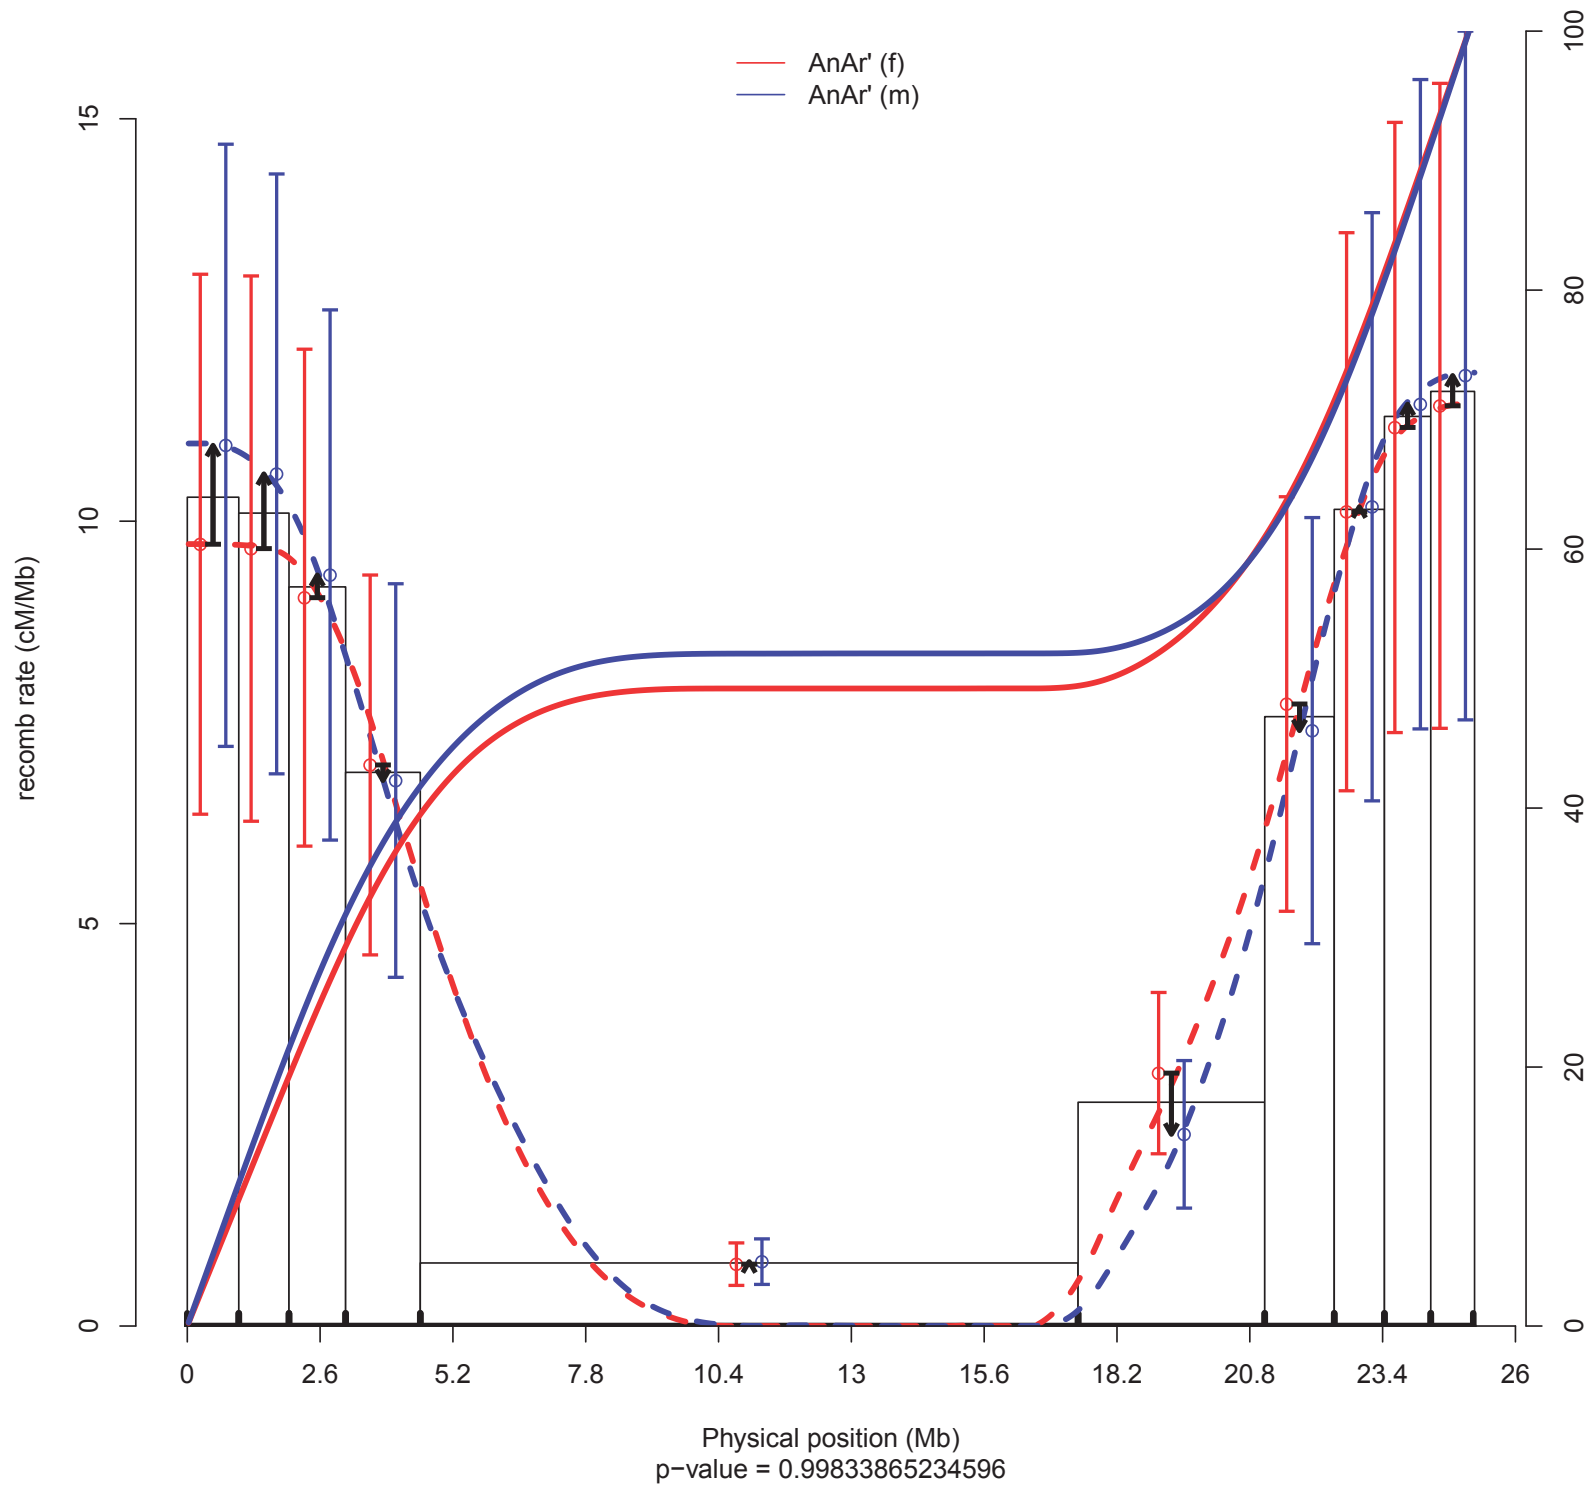

# AnAr' (f) - AnAr' (m) chr 6

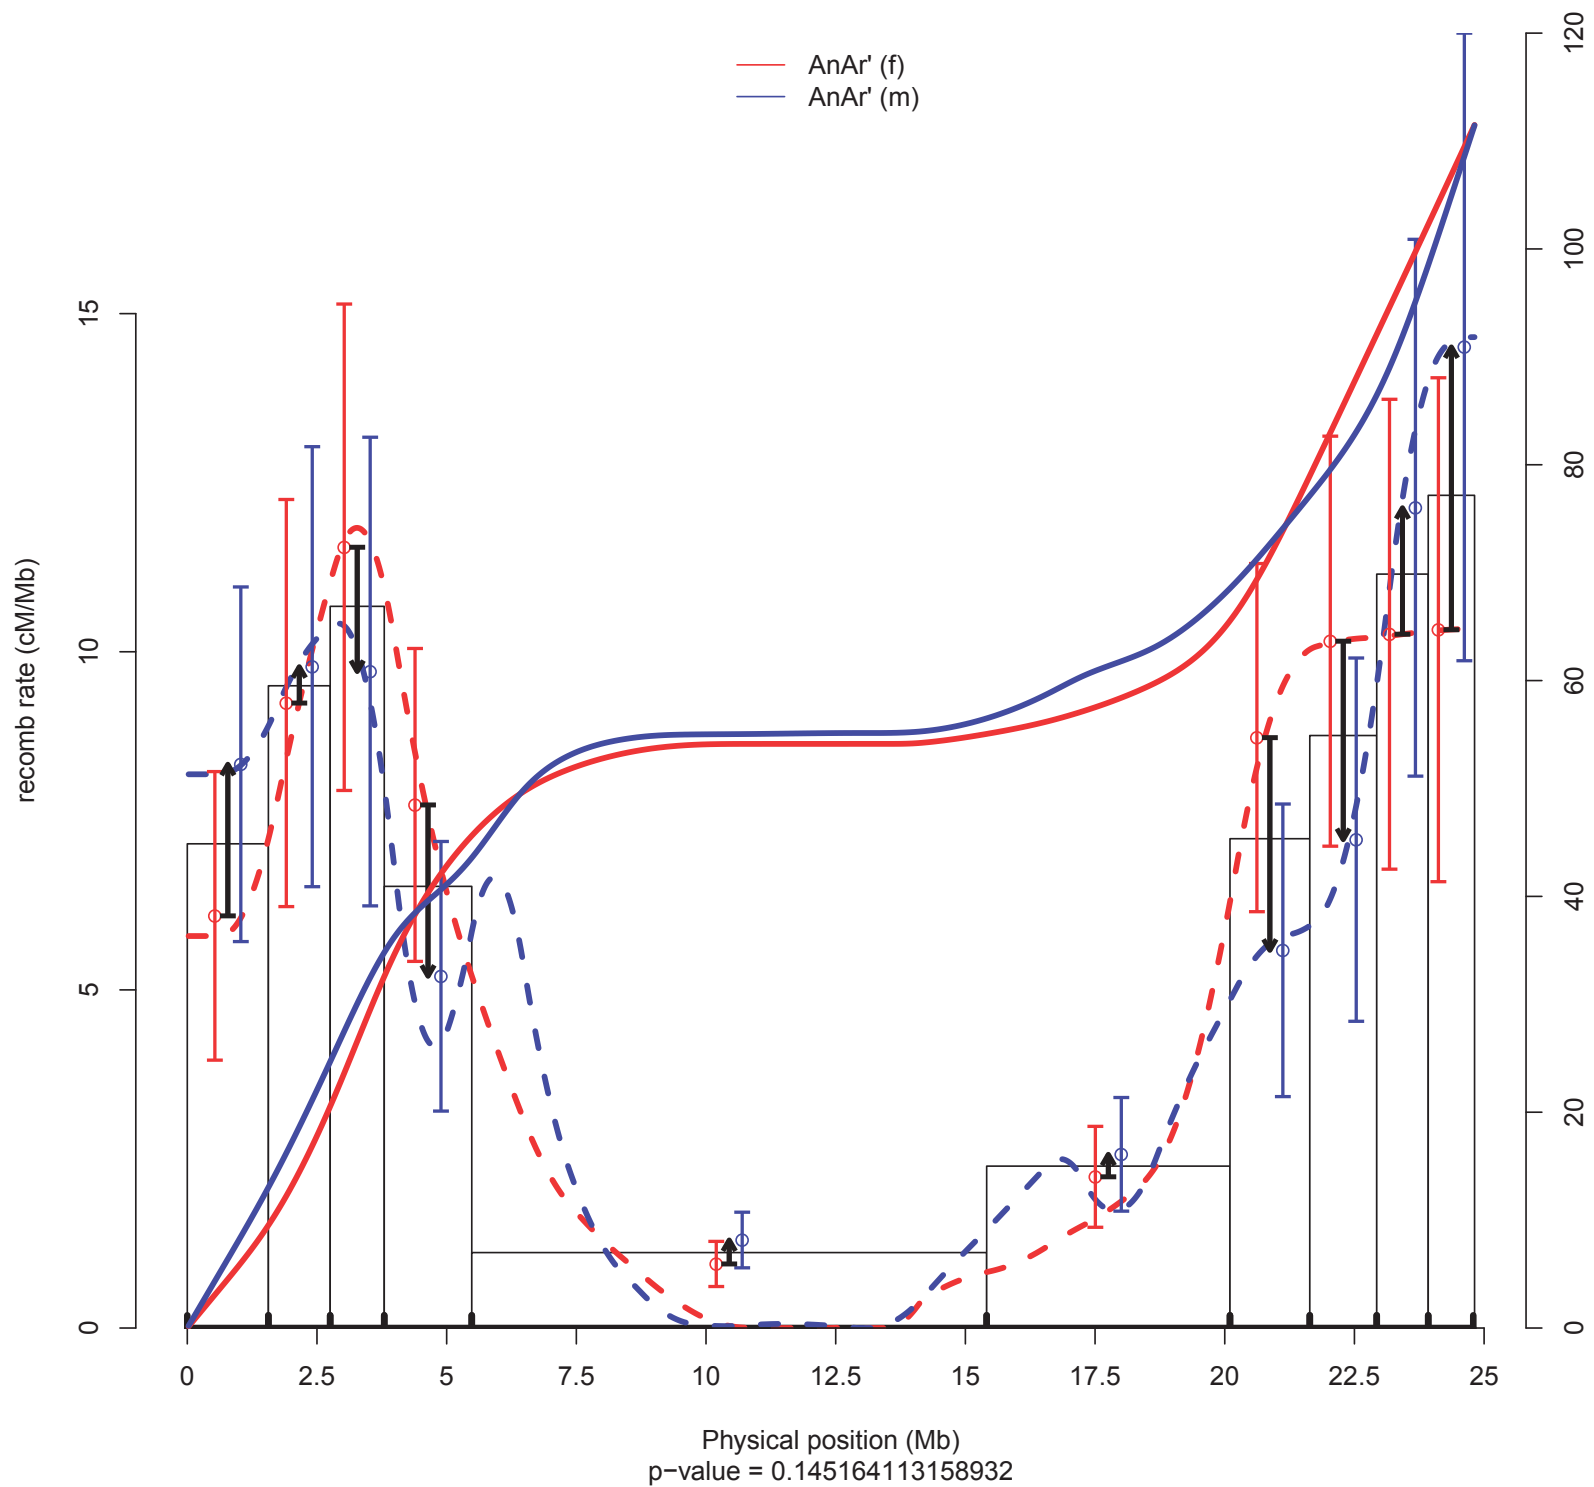

# AnAr' (f) - AnAr' (m) chr 7

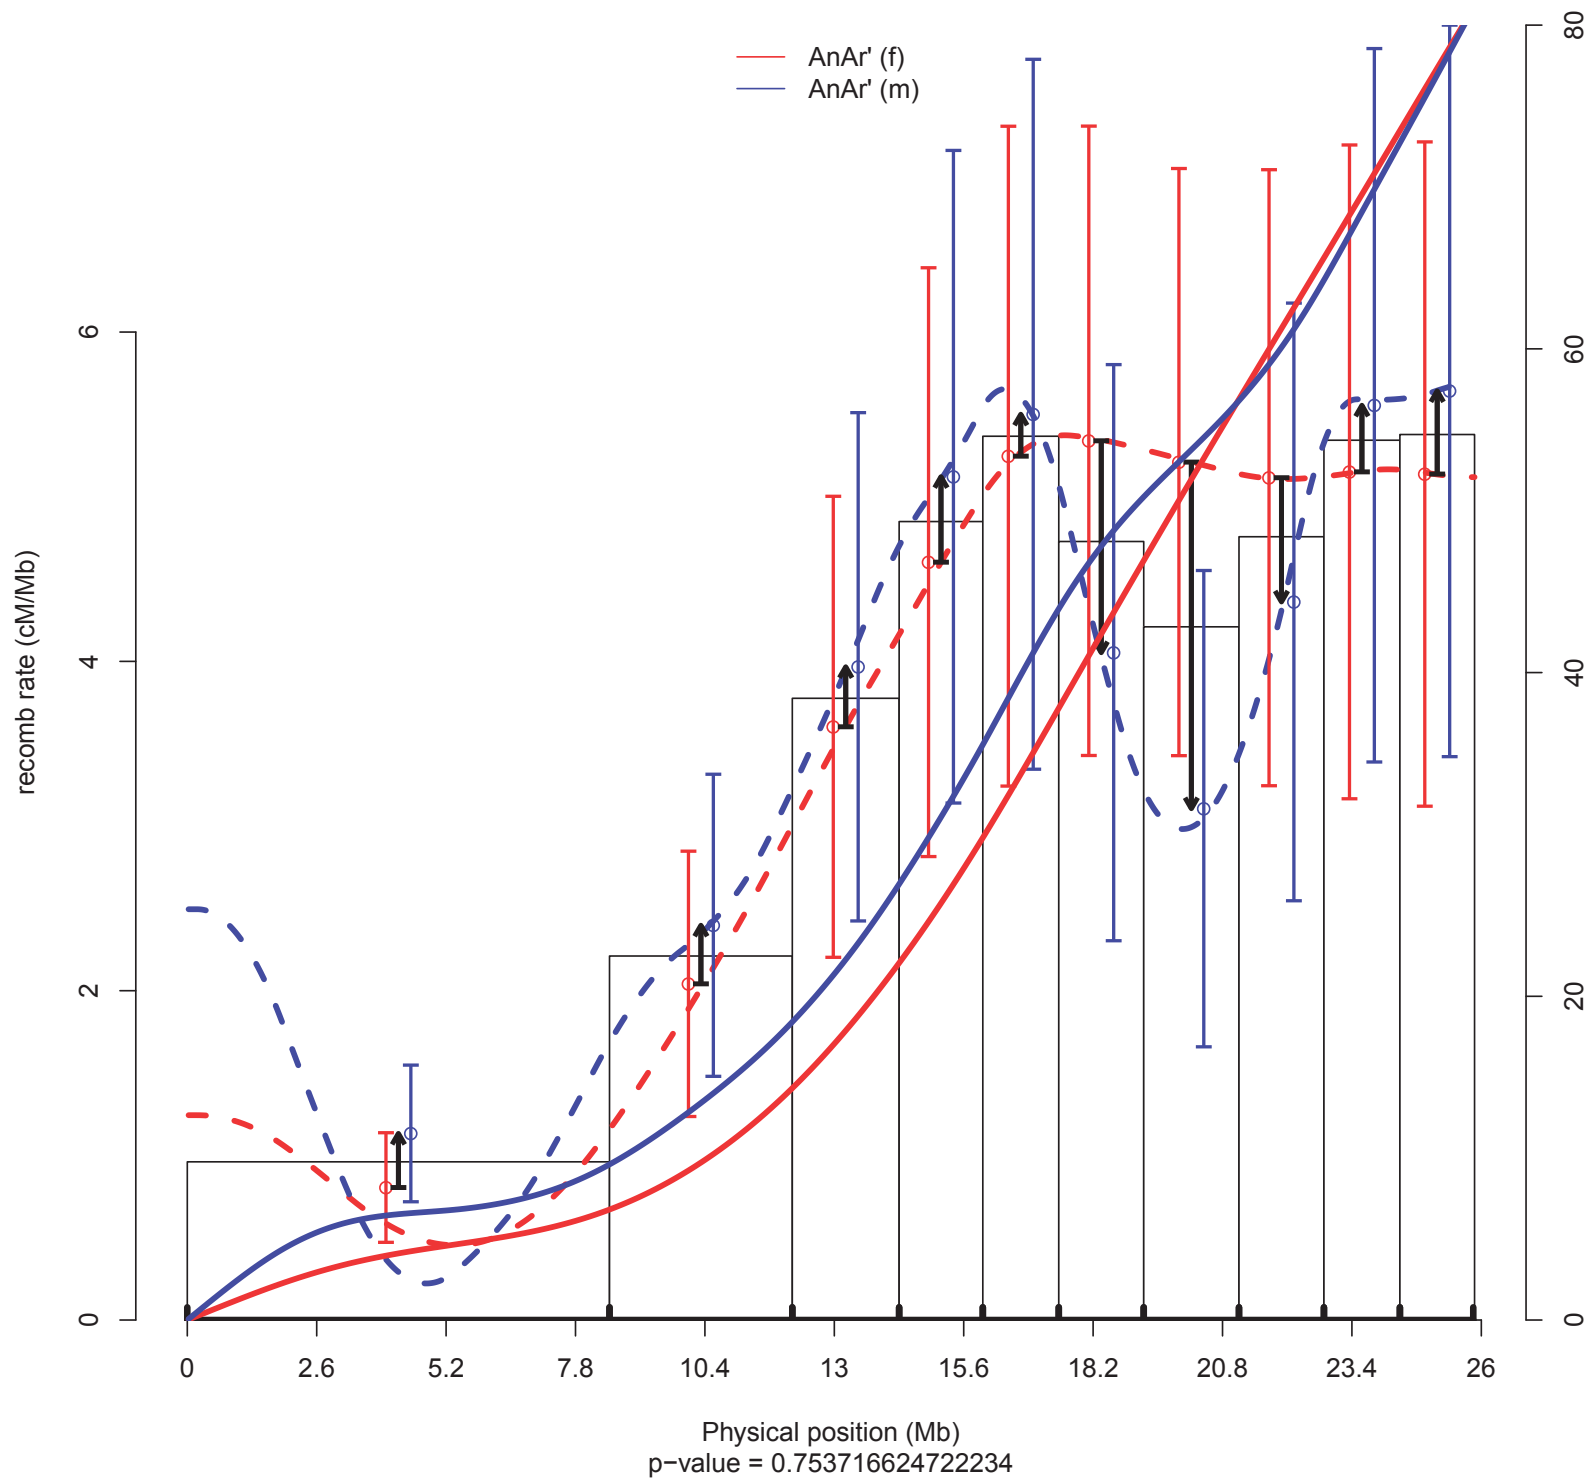

# AnAr' (f) - AnAr' (m) chr 8

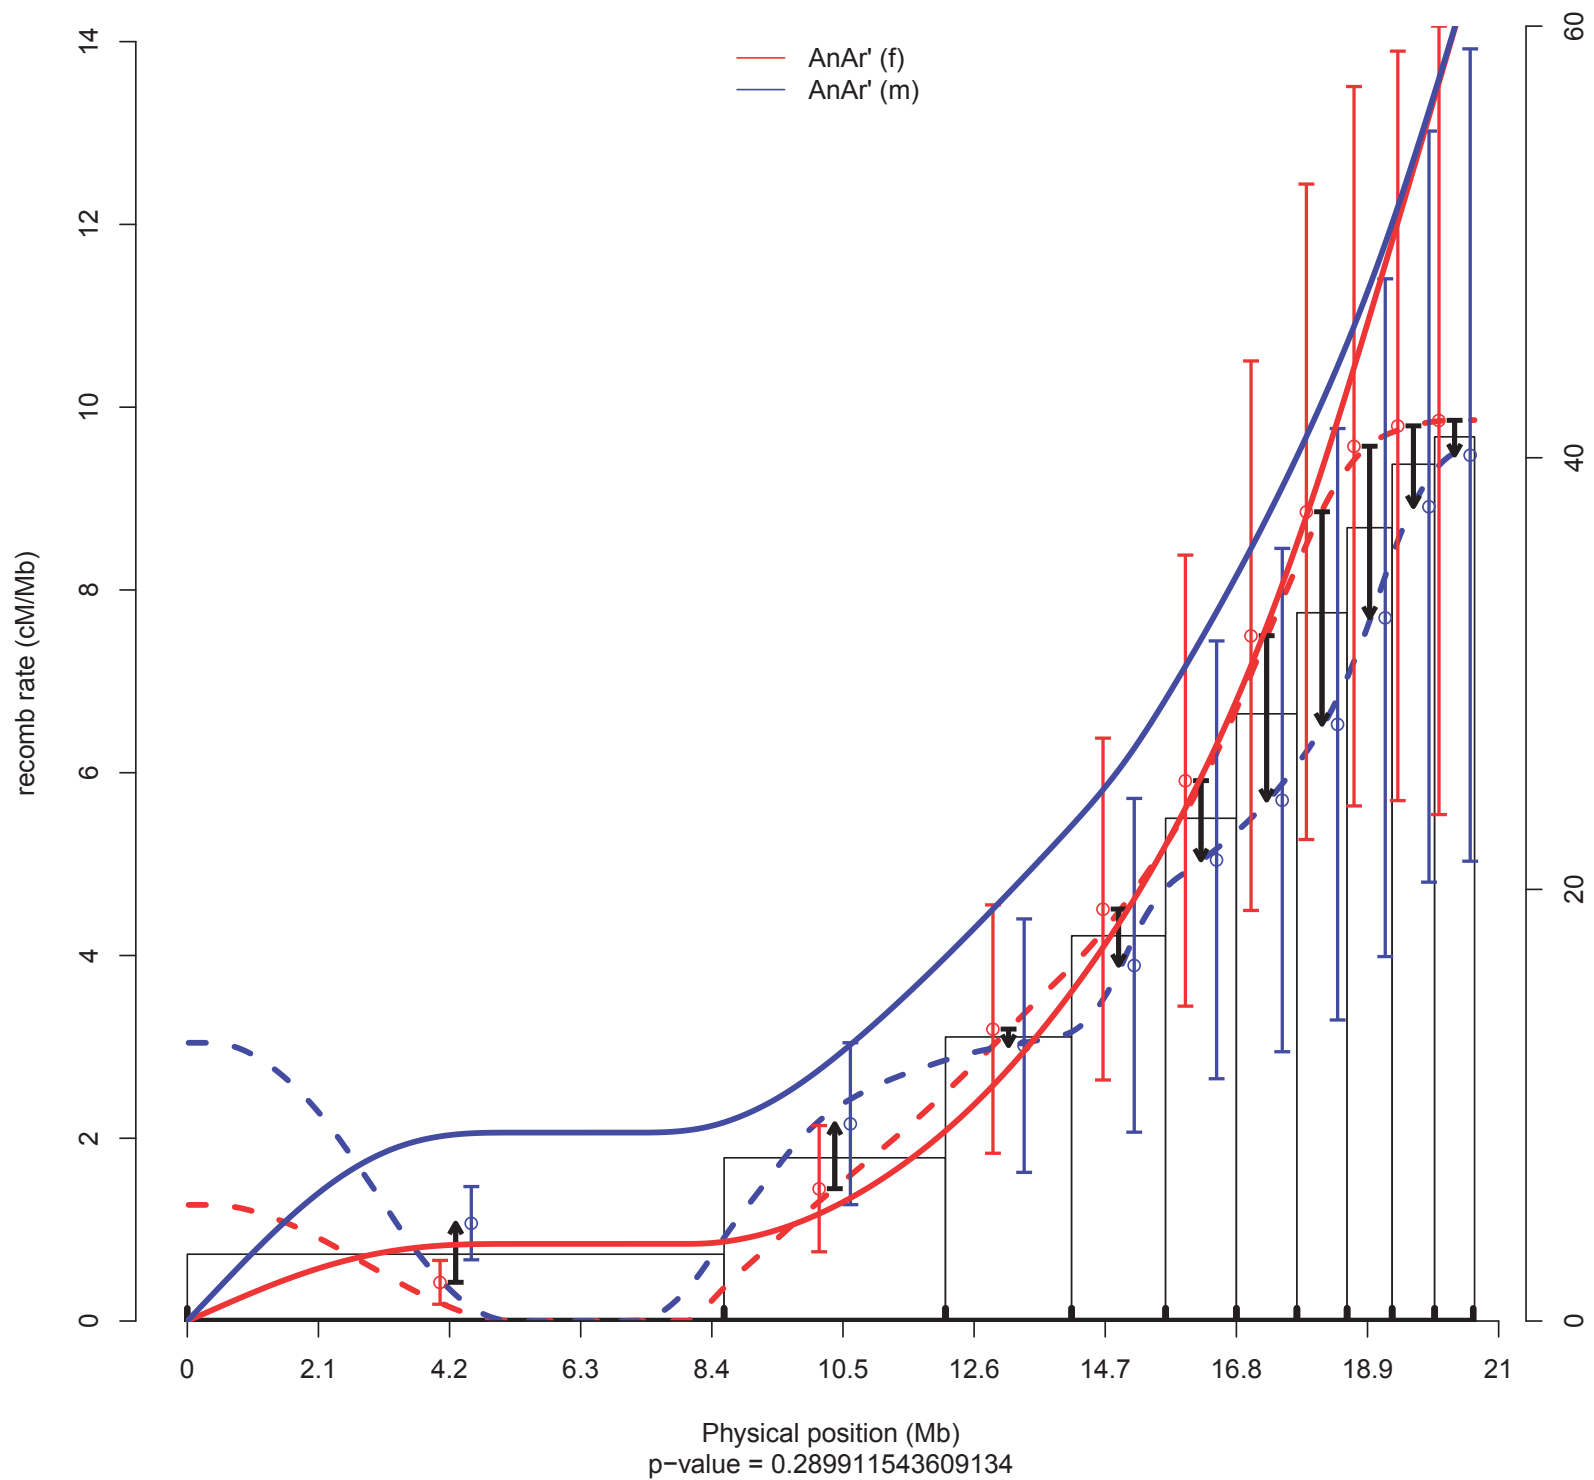



# AnAr' (f) - AnAr' (m) chr 9

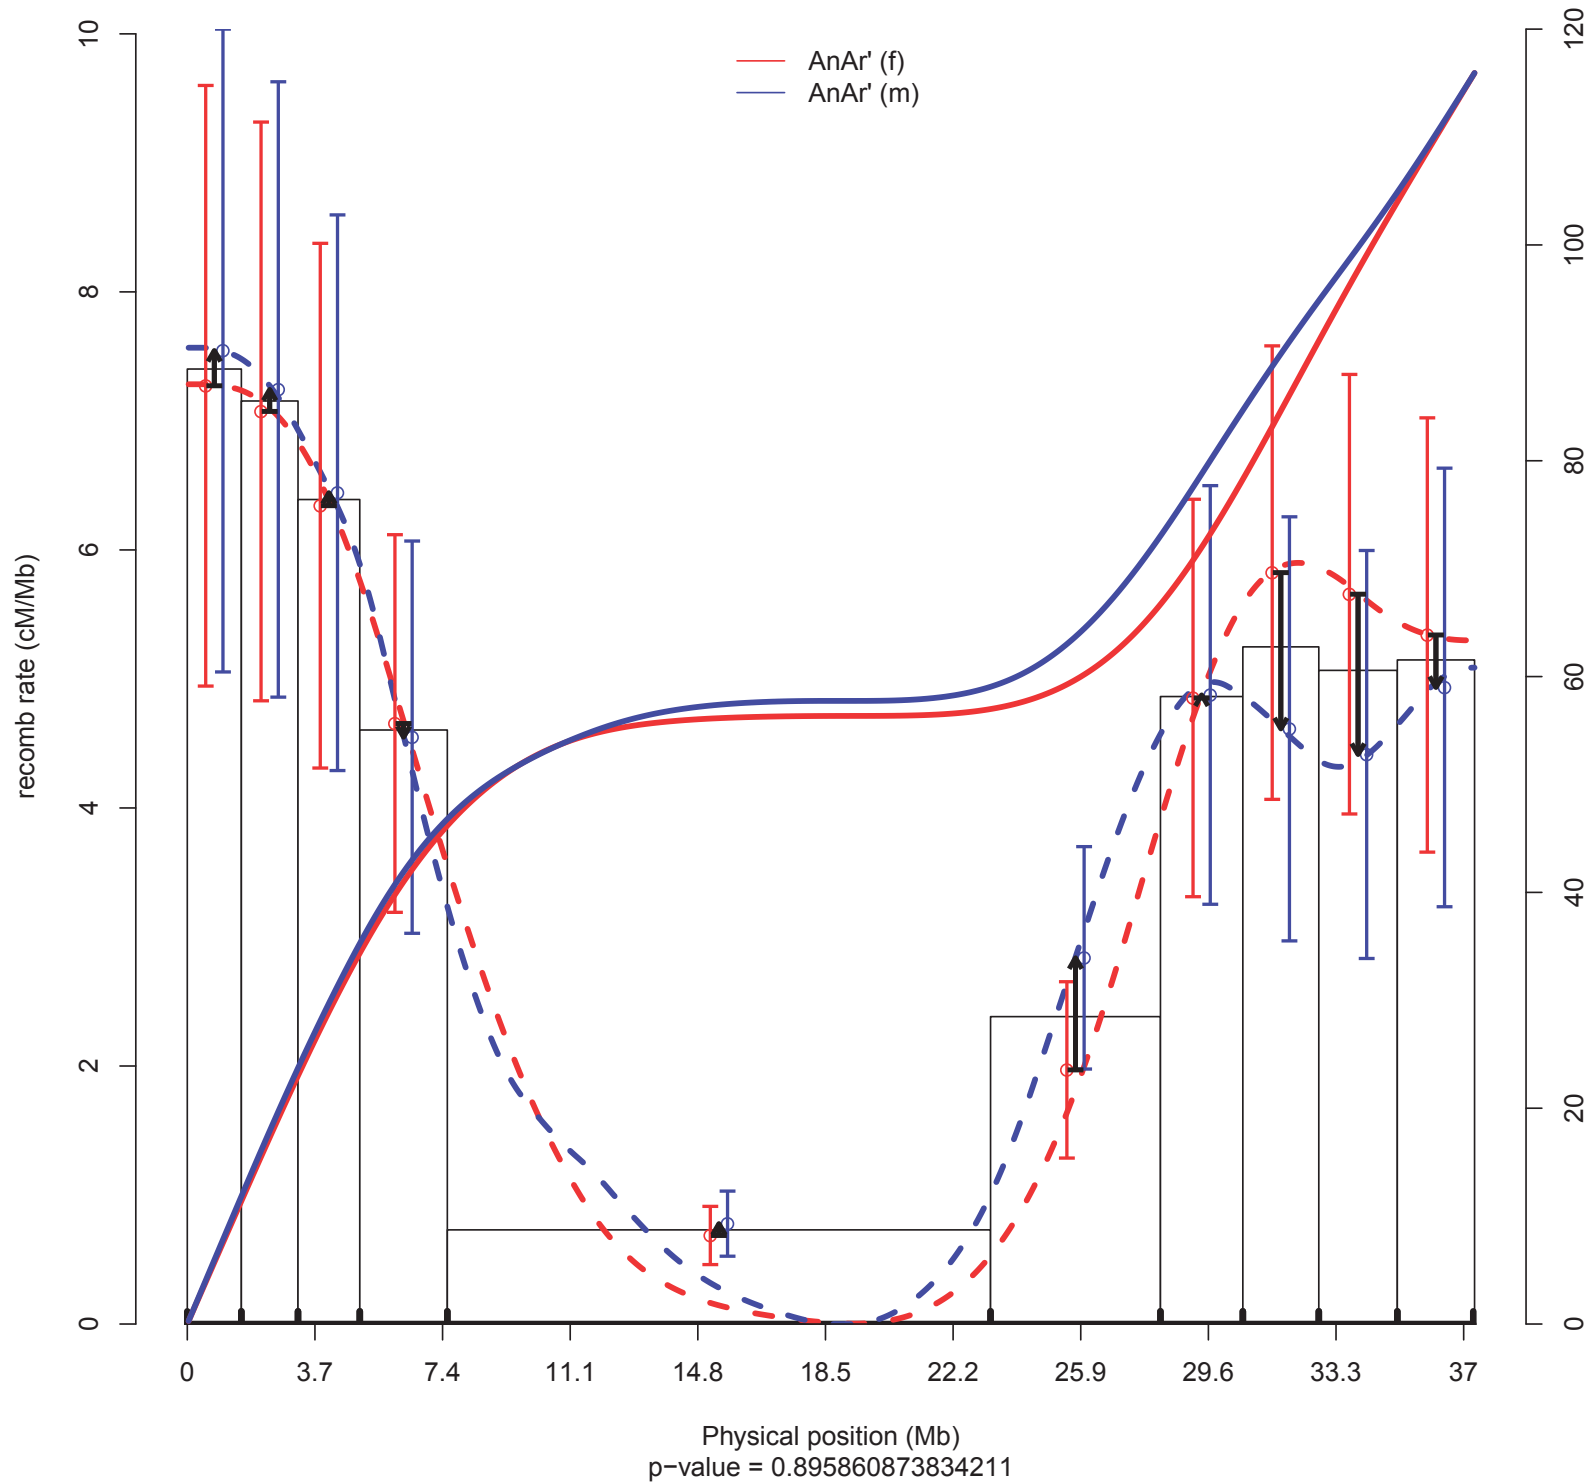

# AnAr' (f) - AnAr' (m) chr 10

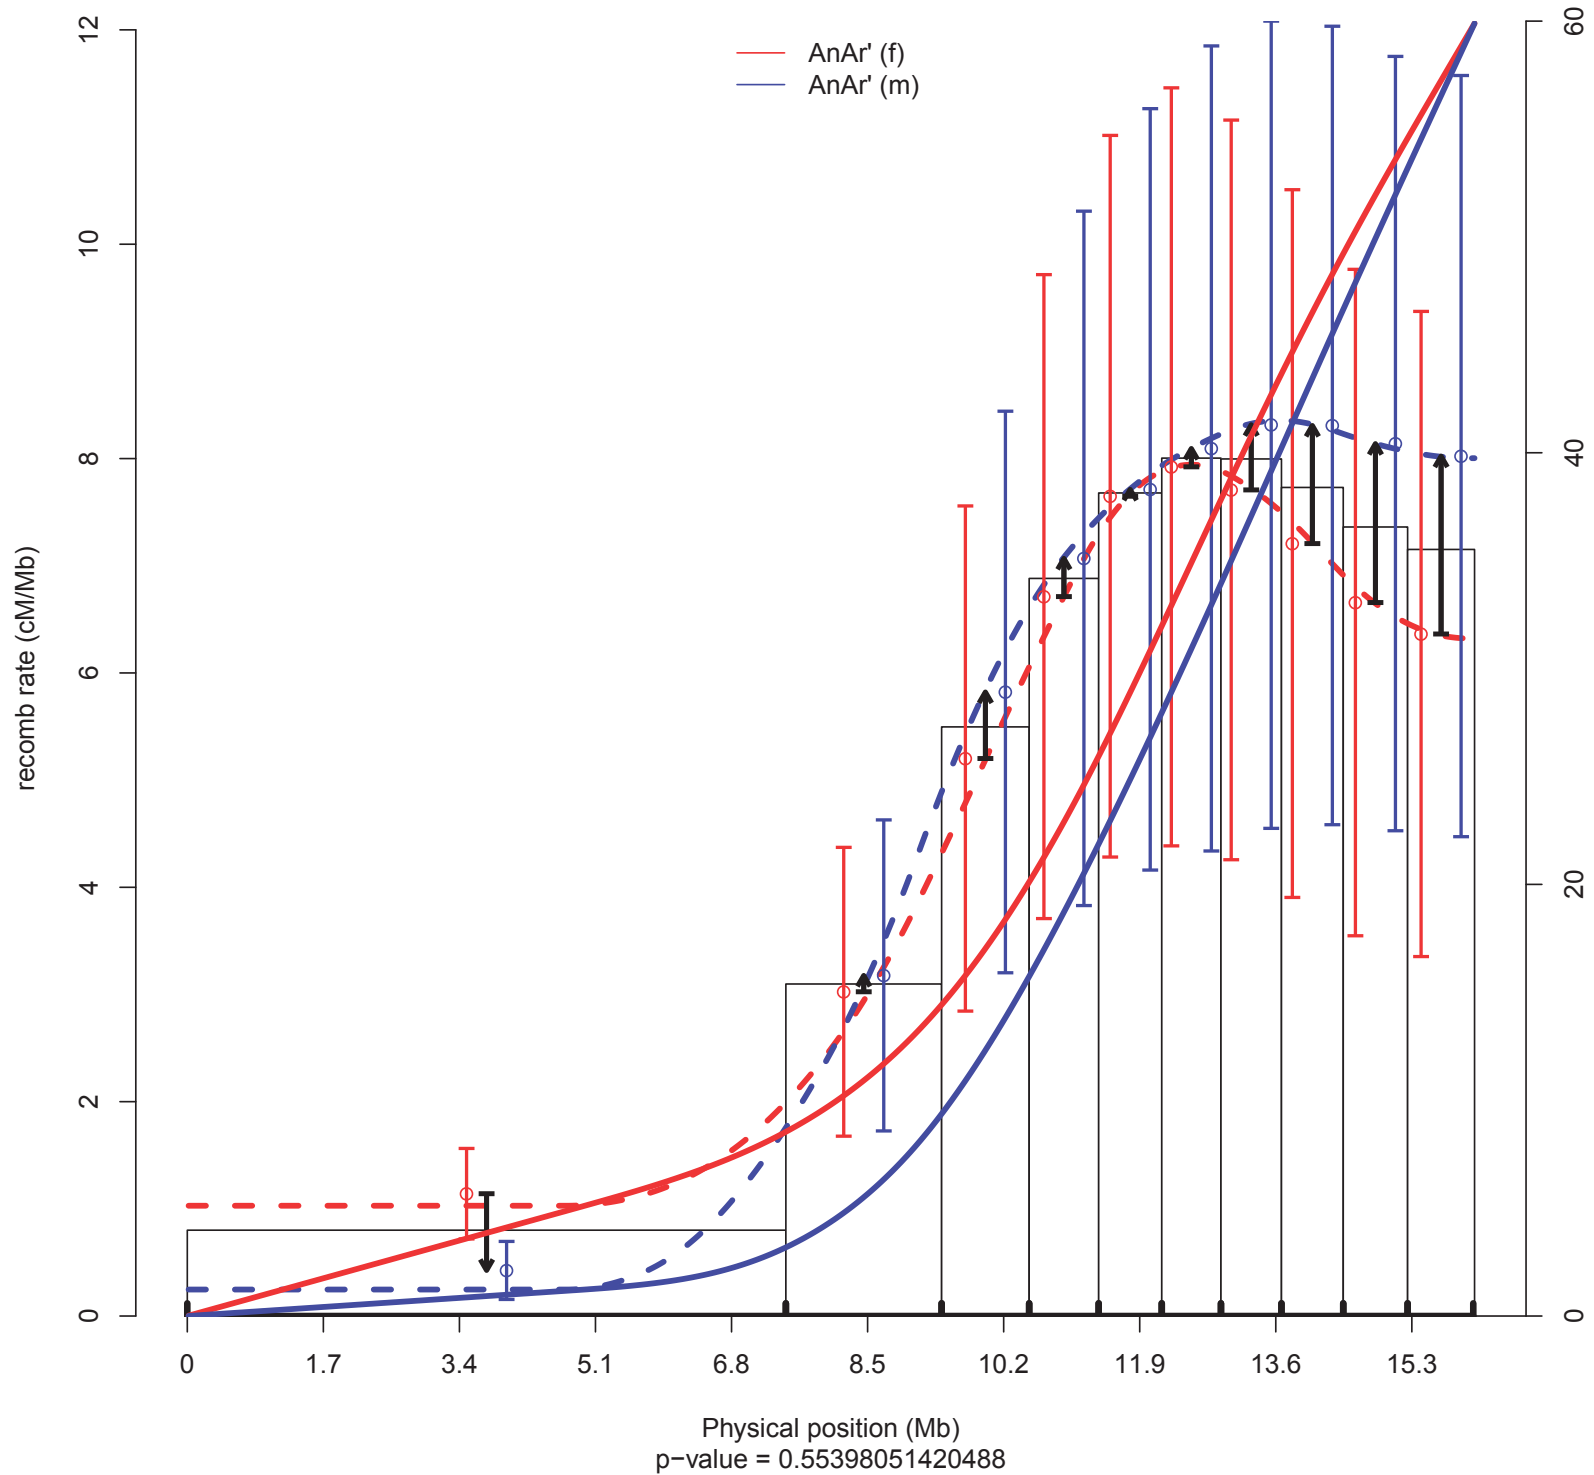

# AnAr'Cn (f) - AnAr'Cn (m) chr 1

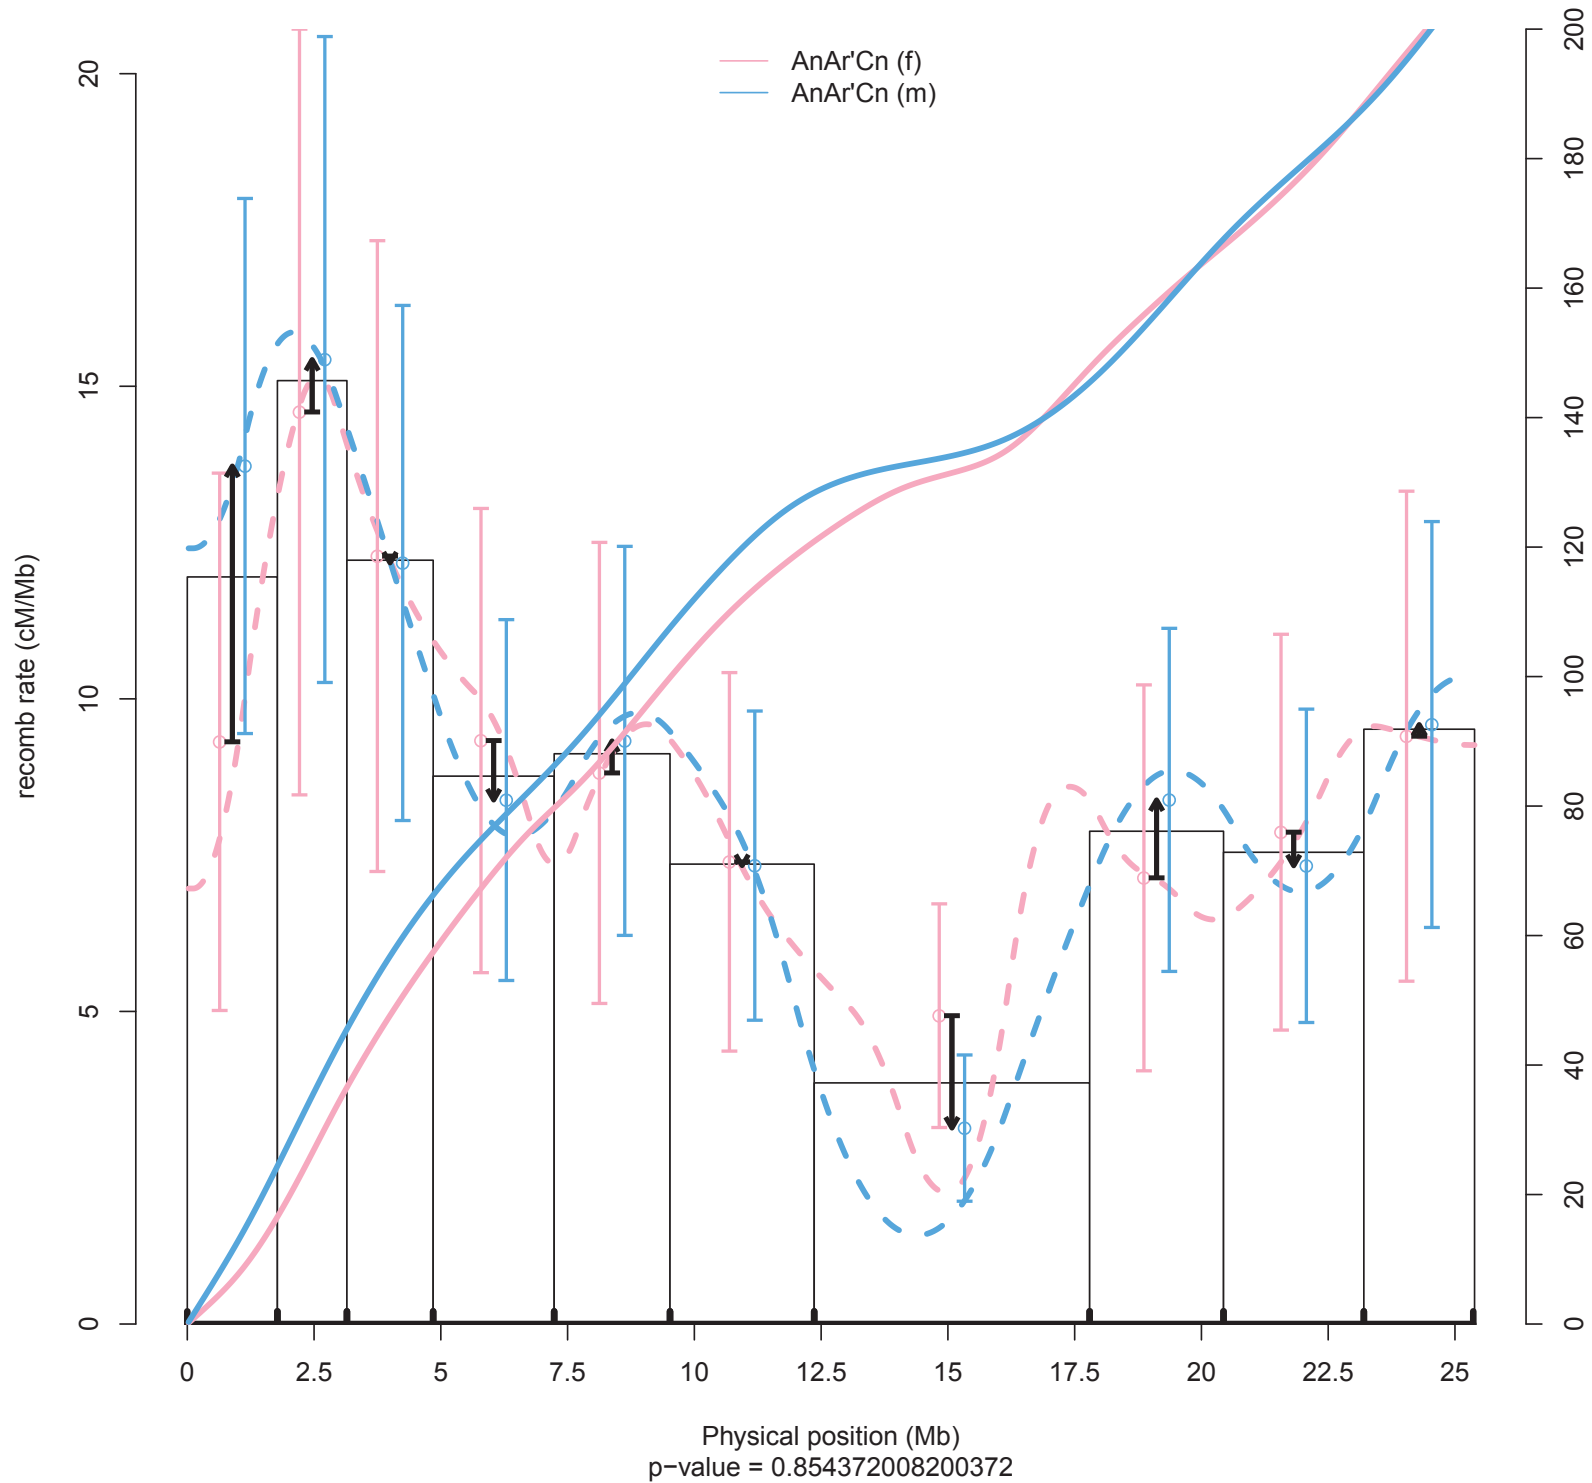

# AnAr'Cn (f) - AnAr'Cn (m) chr 2

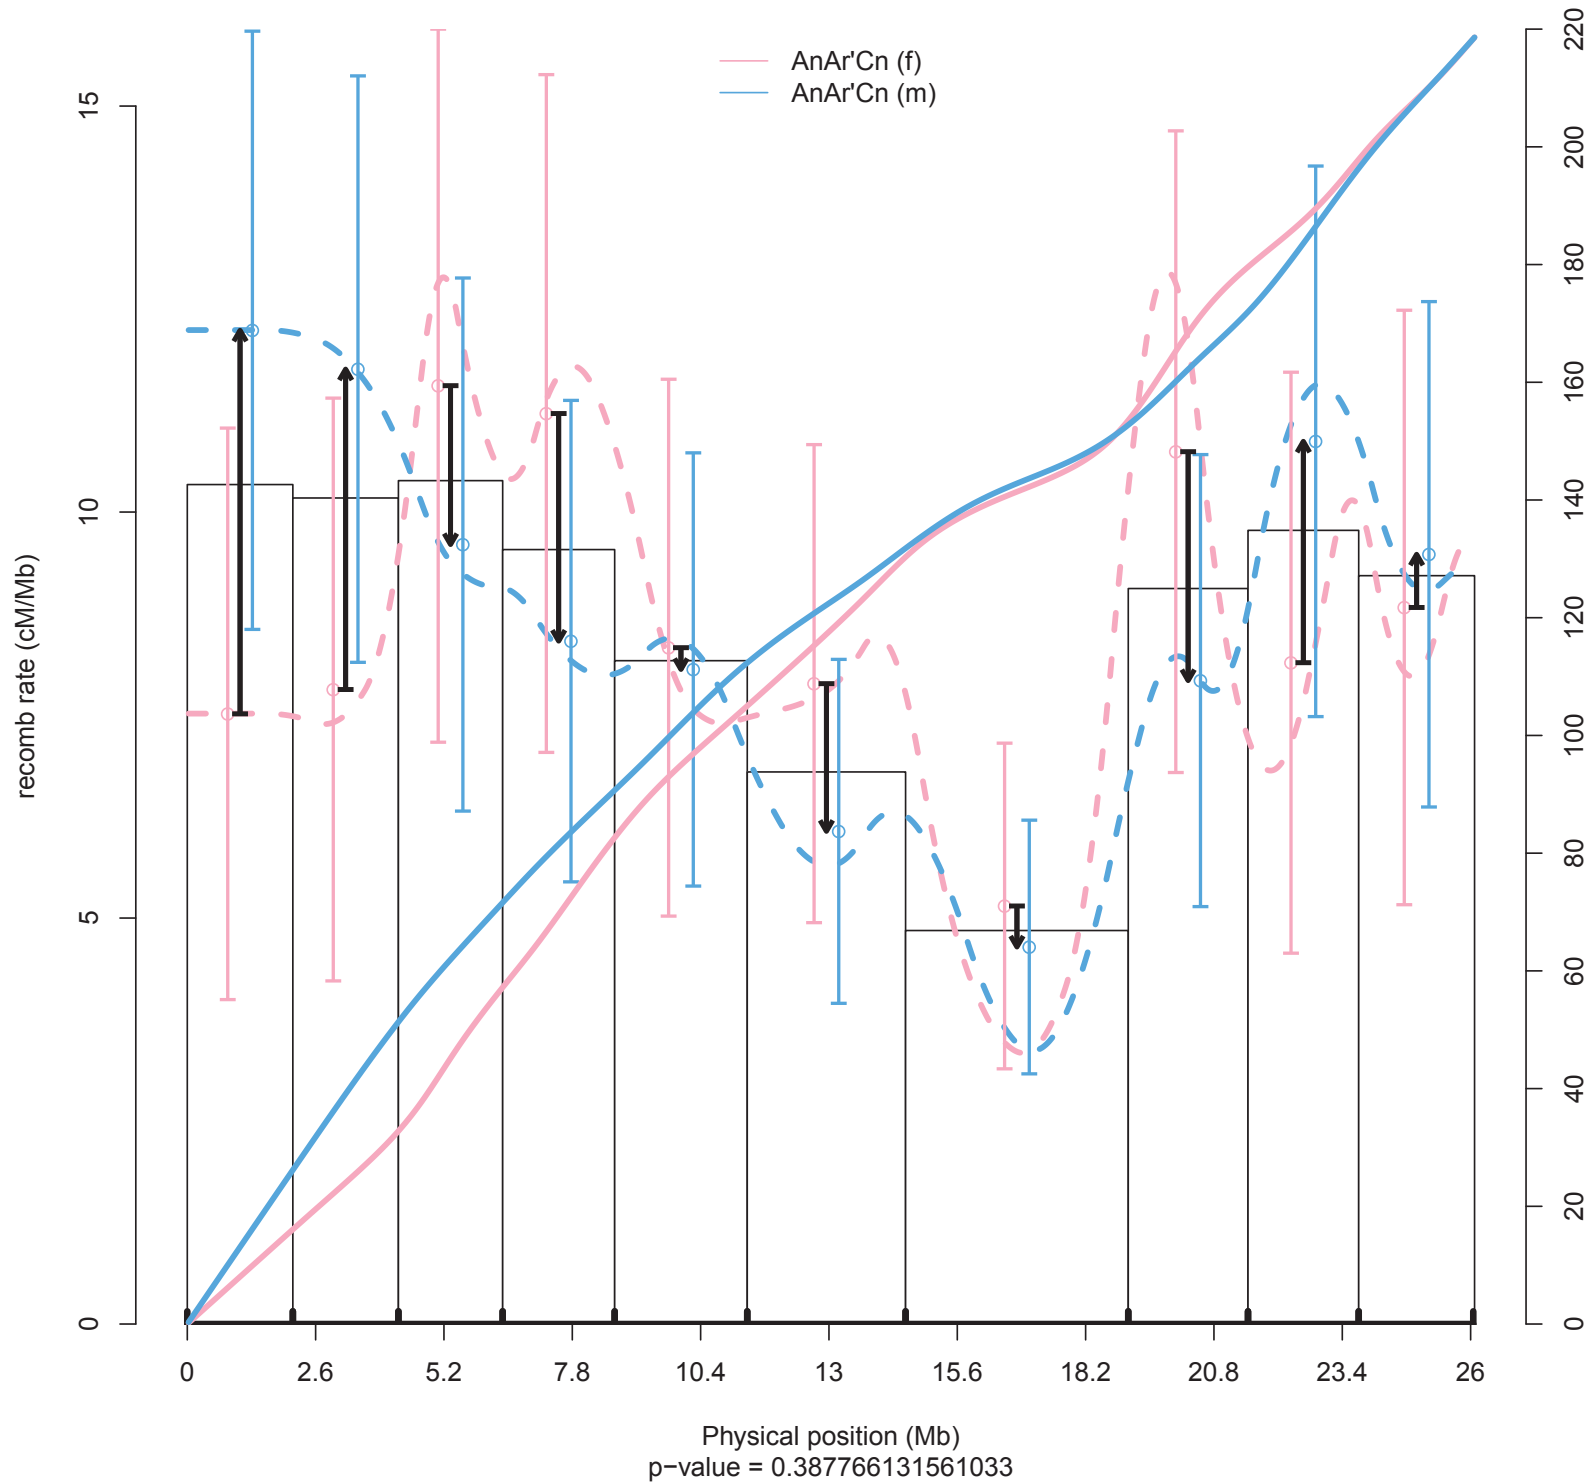

### AnAr'Cn (f) - AnAr'Cn (m) chr 3

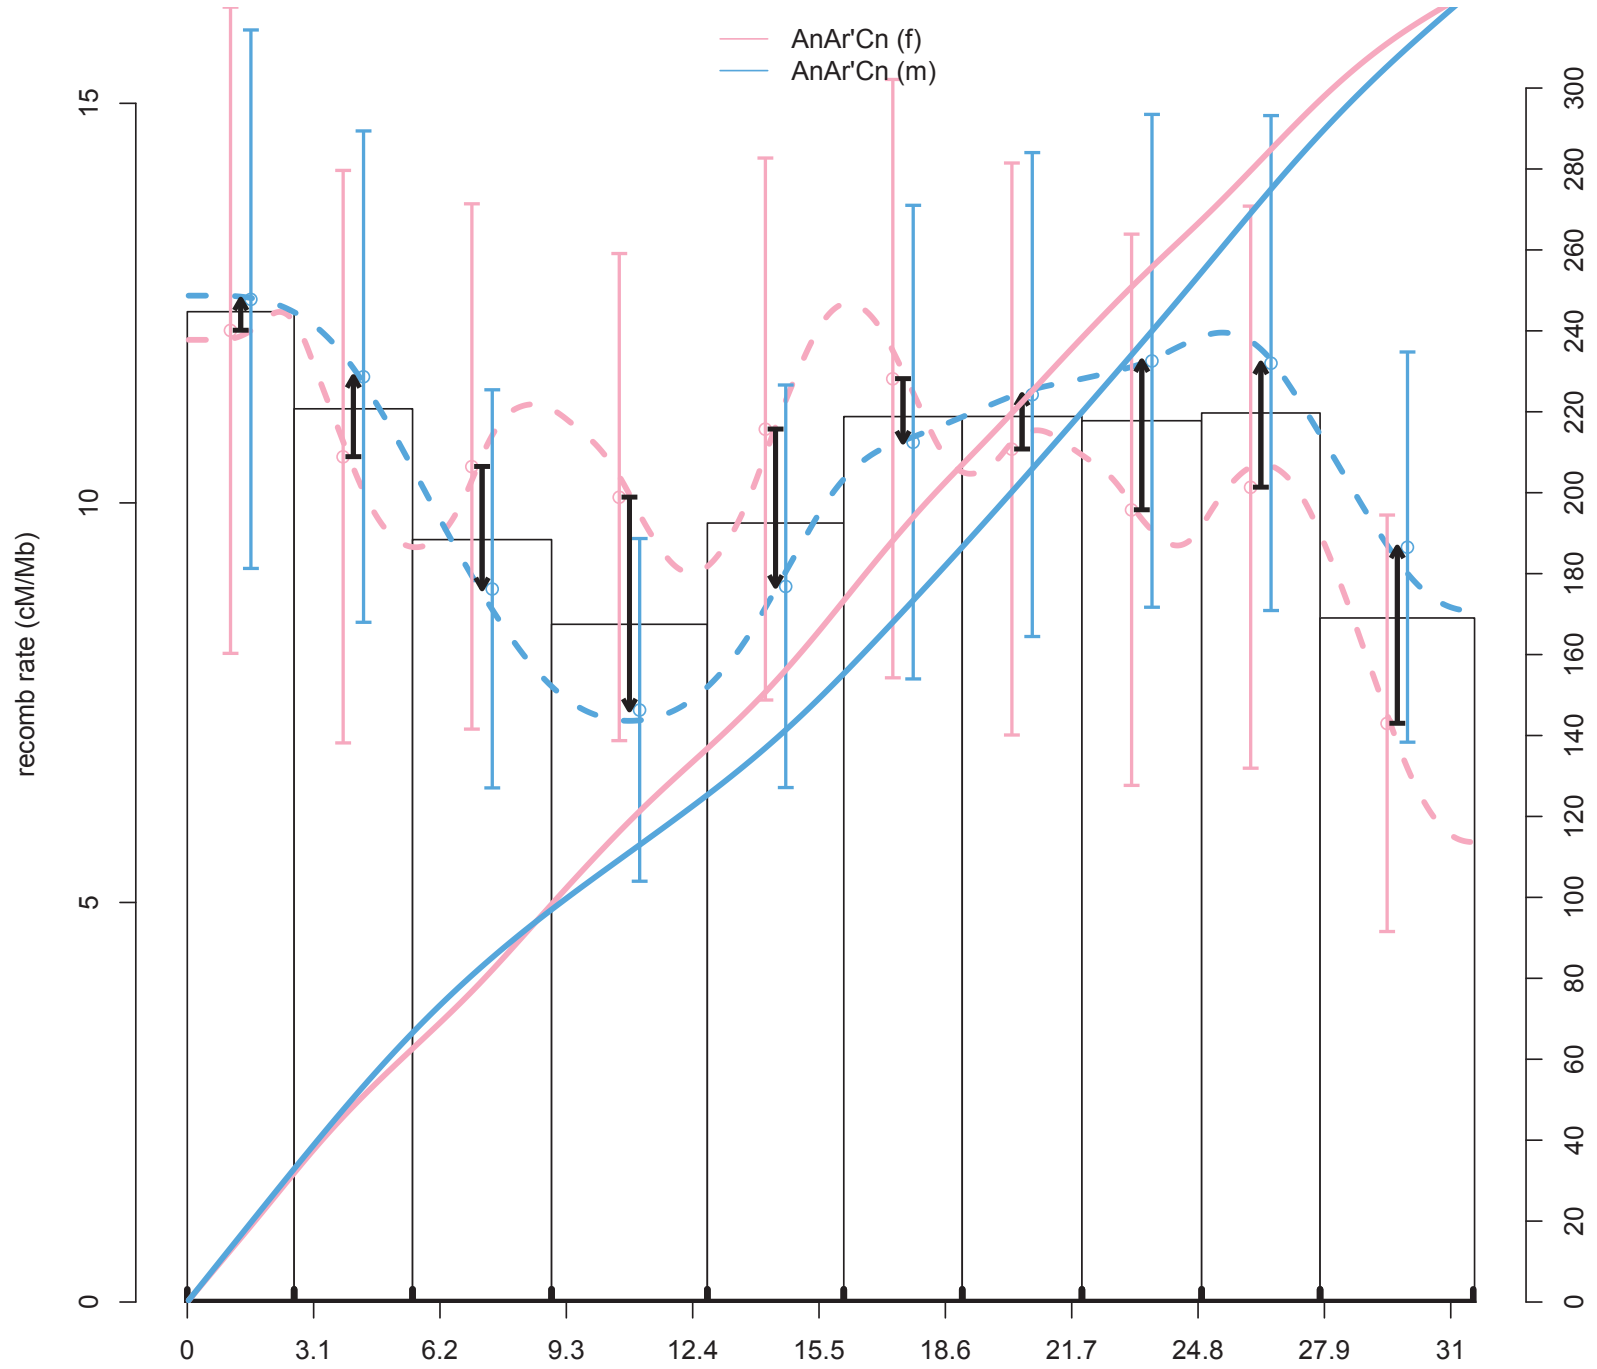

# AnAr'Cn (f) - AnAr'Cn (m) chr 4

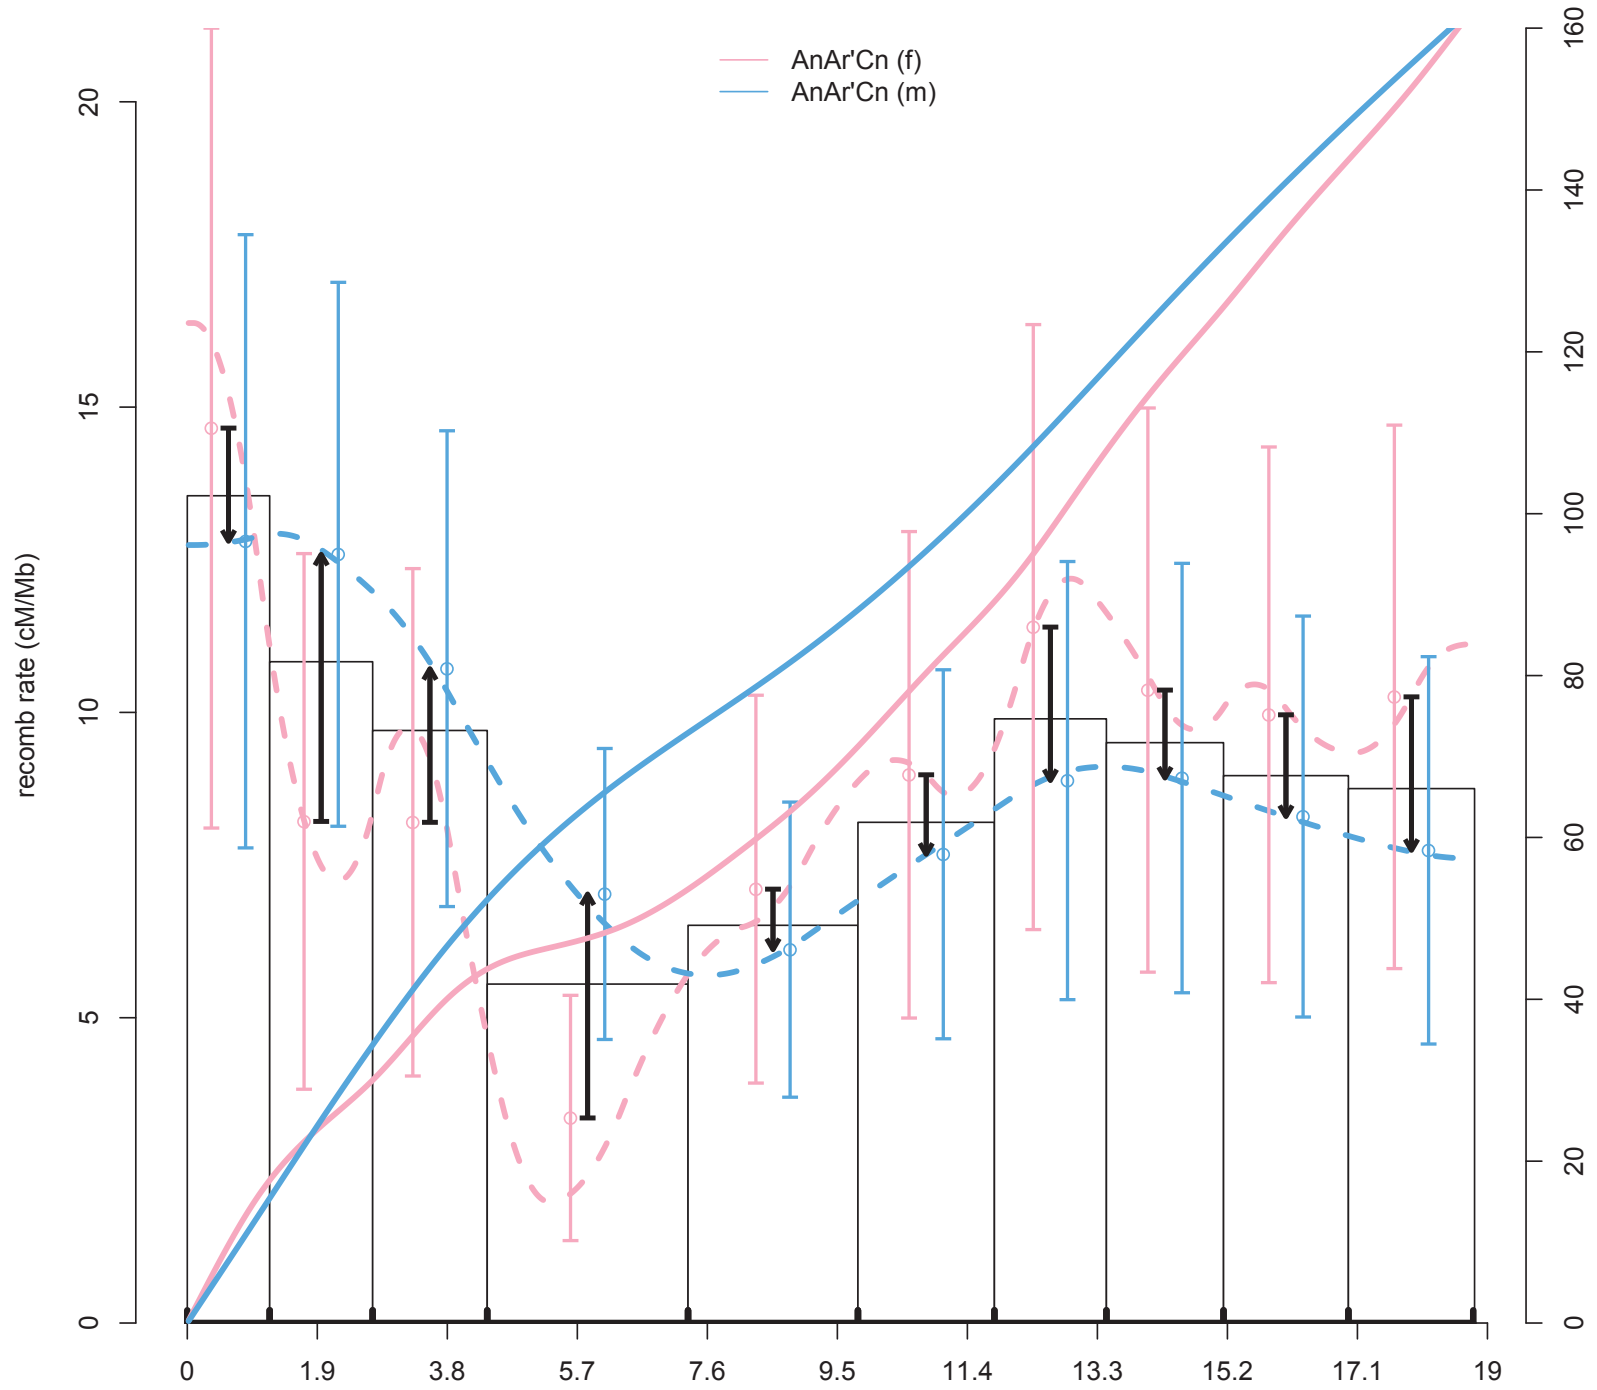

Physical position (Mb)  
p-value = 0.445595993965112

# AnAr'Cn (f) - AnAr'Cn (m) chr 5

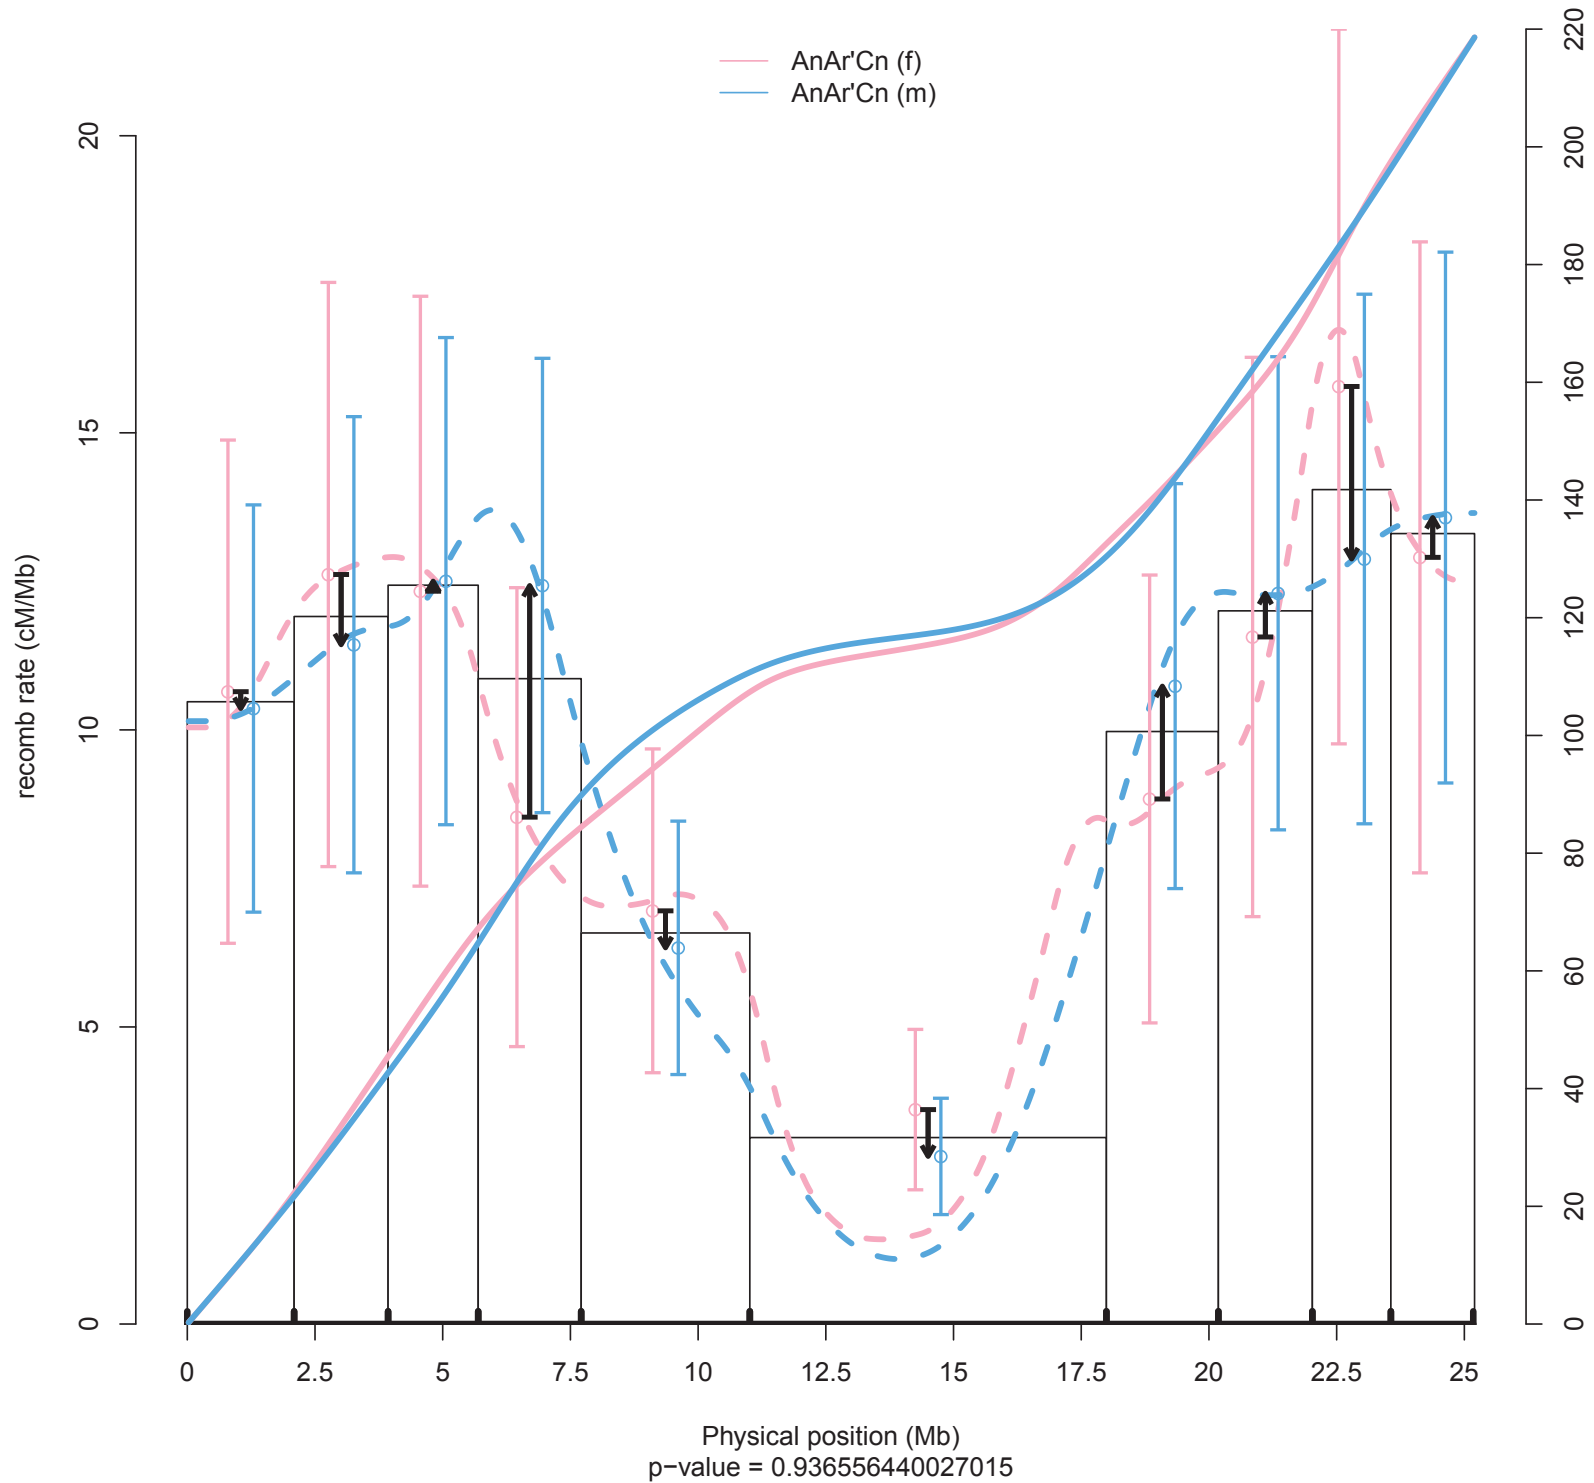

# AnAr'Cn (f) - AnAr'Cn (m) chr 6

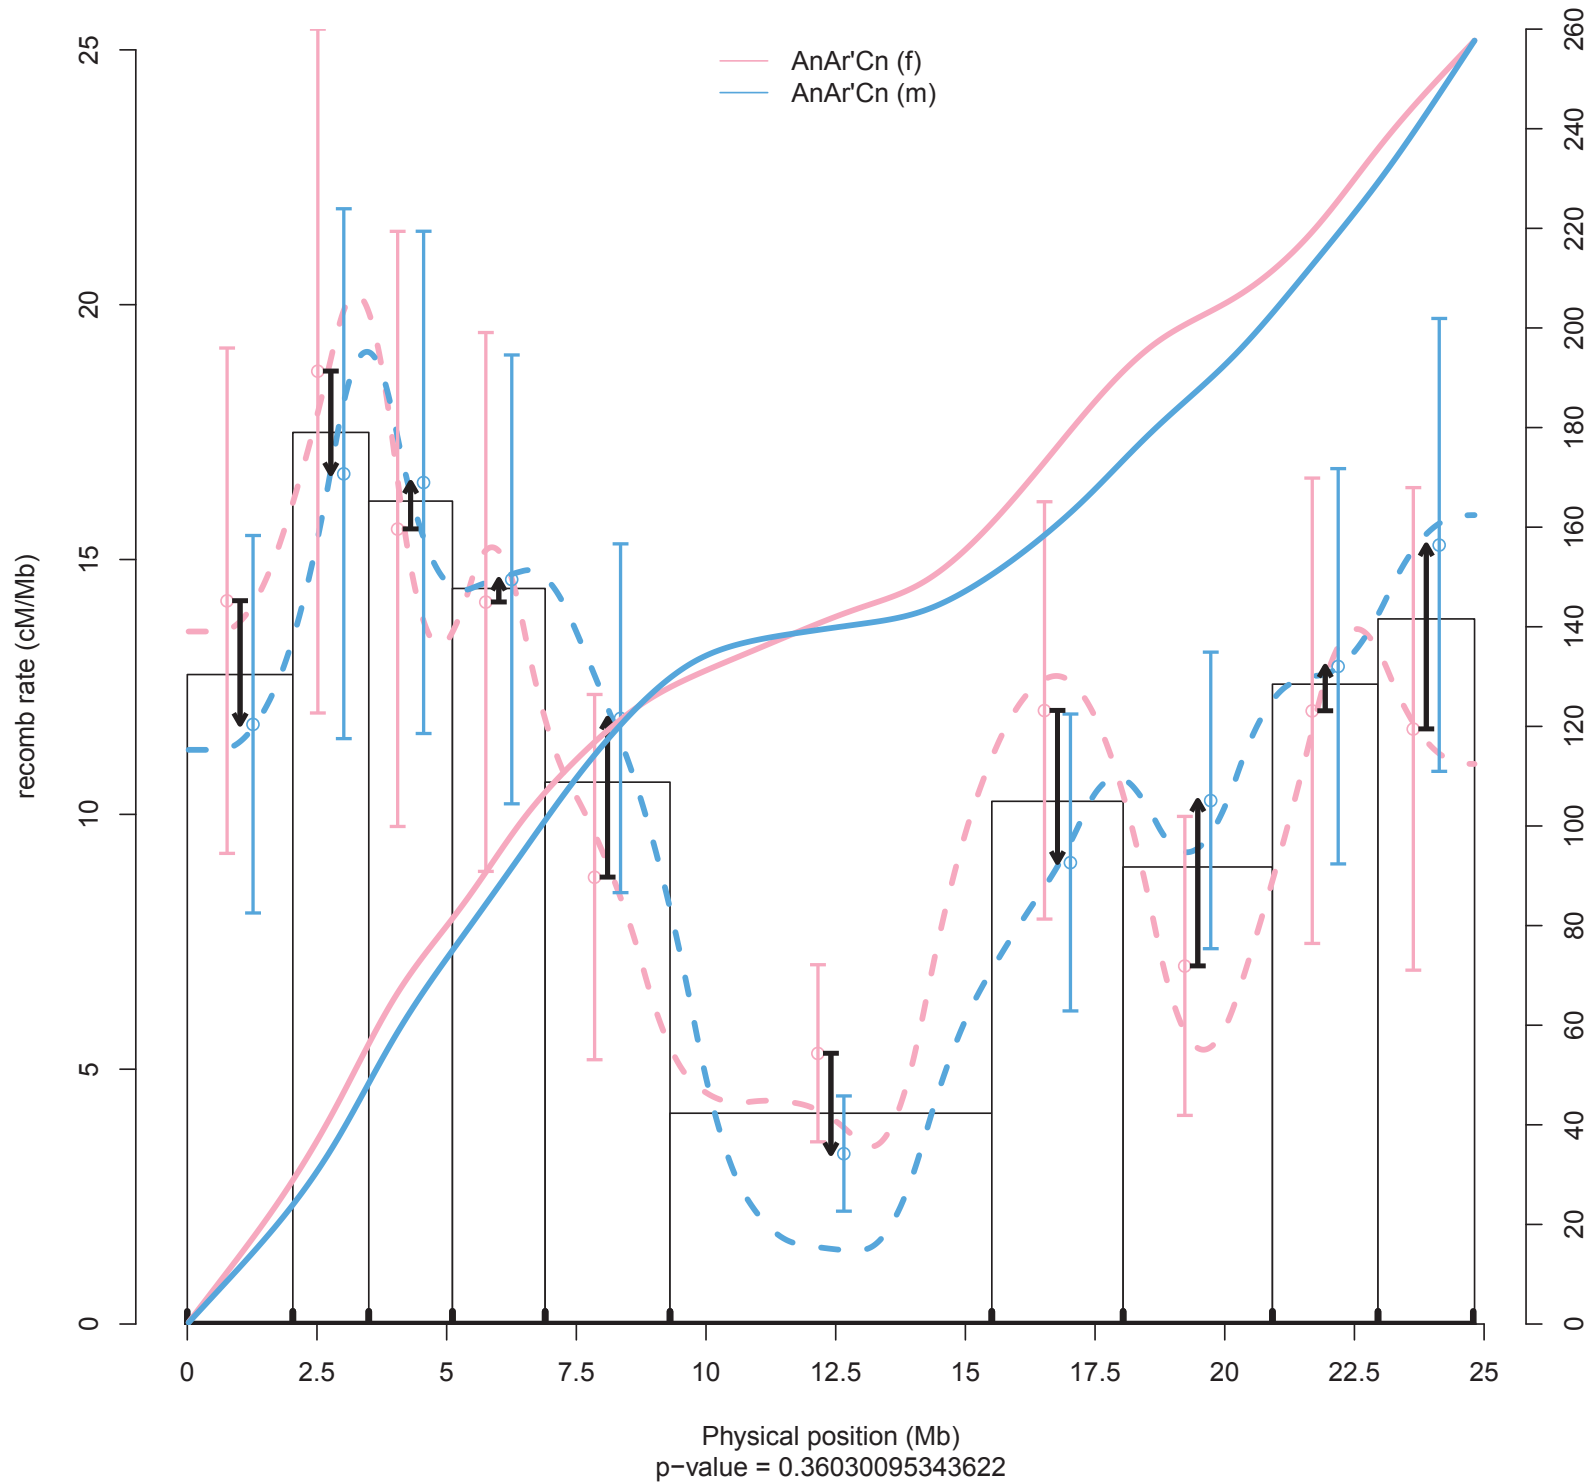



# AnAr'Cn (f) – AnAr'Cn (m) chr 7

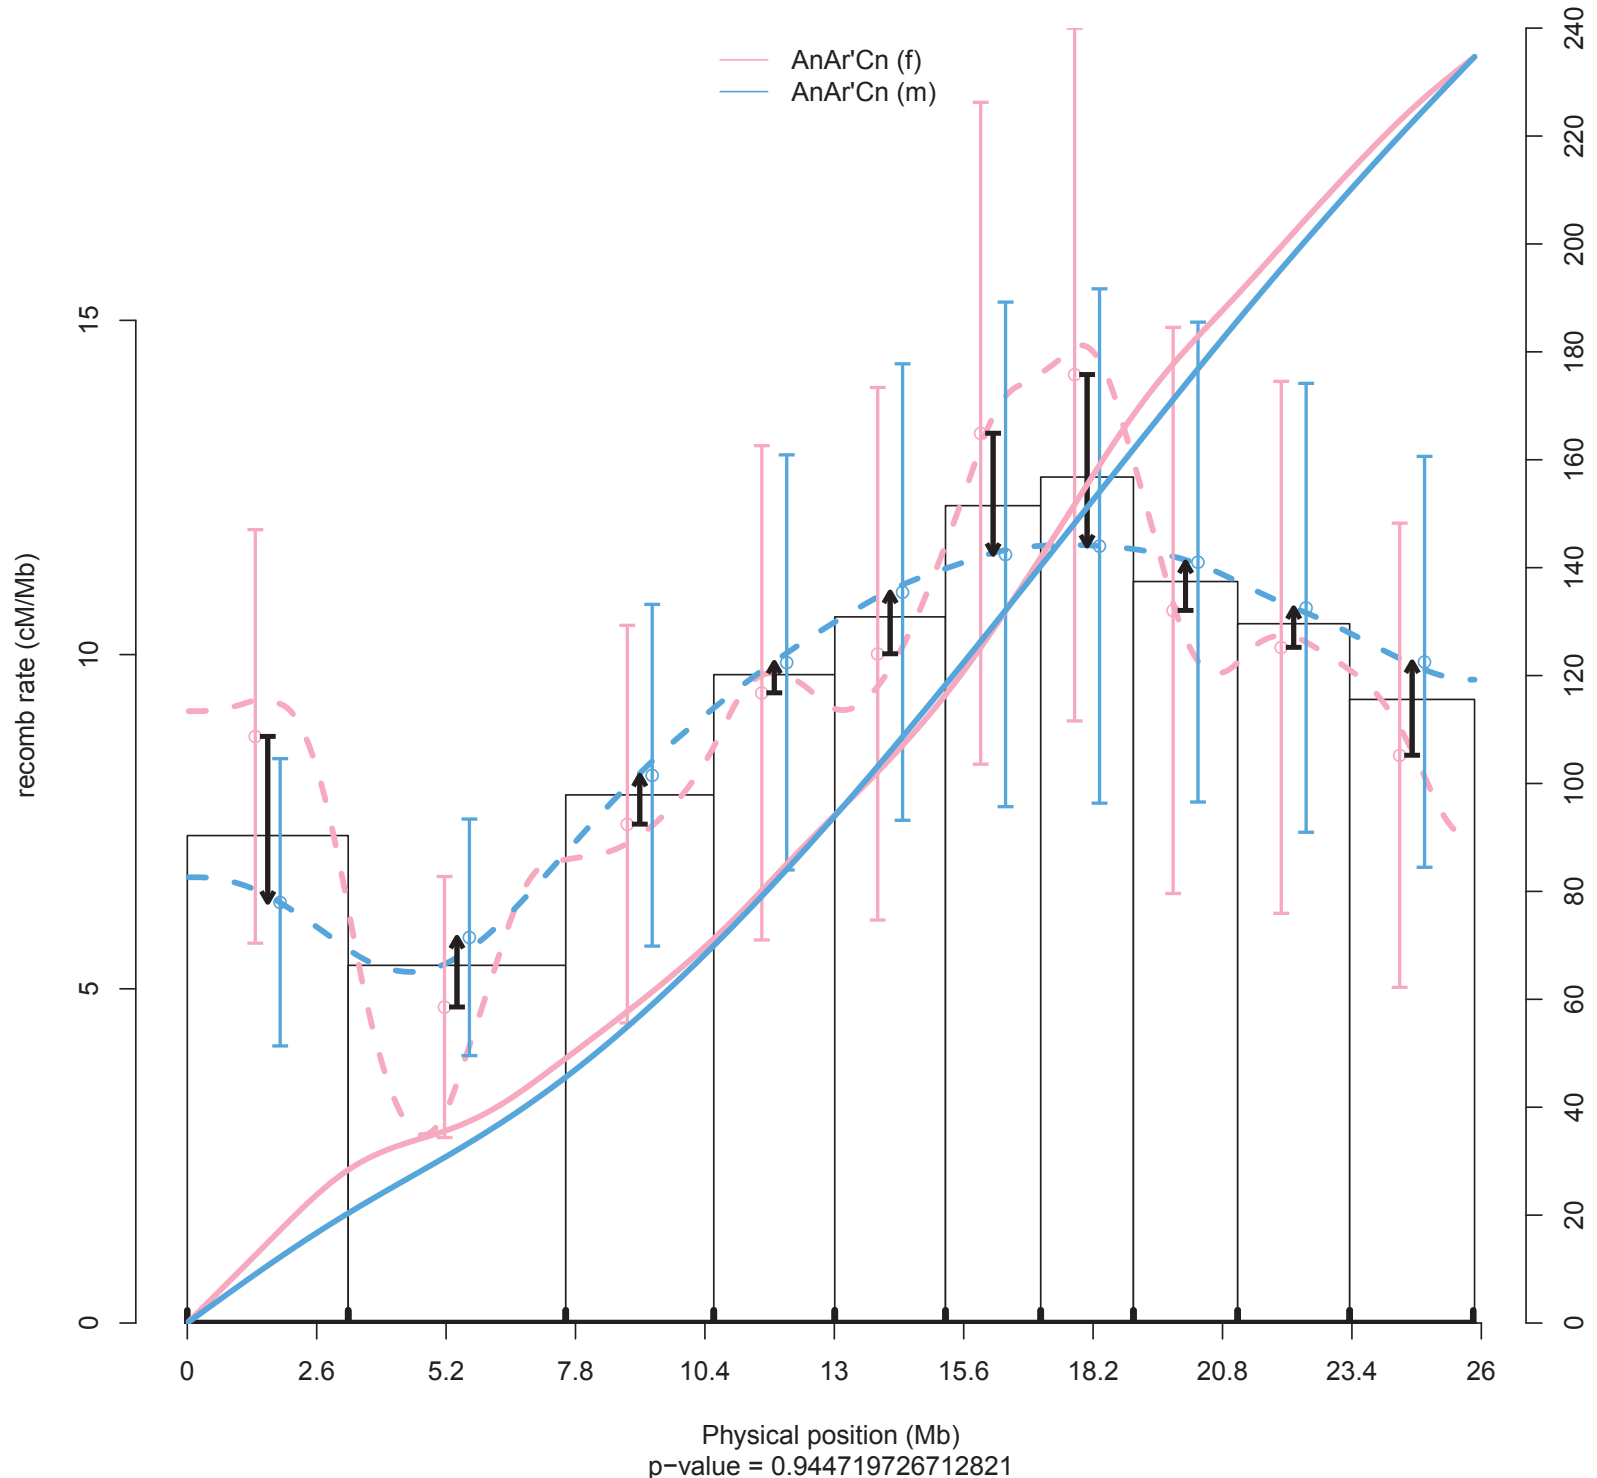

# AnAr'Cn (f) - AnAr'Cn (m) chr 8

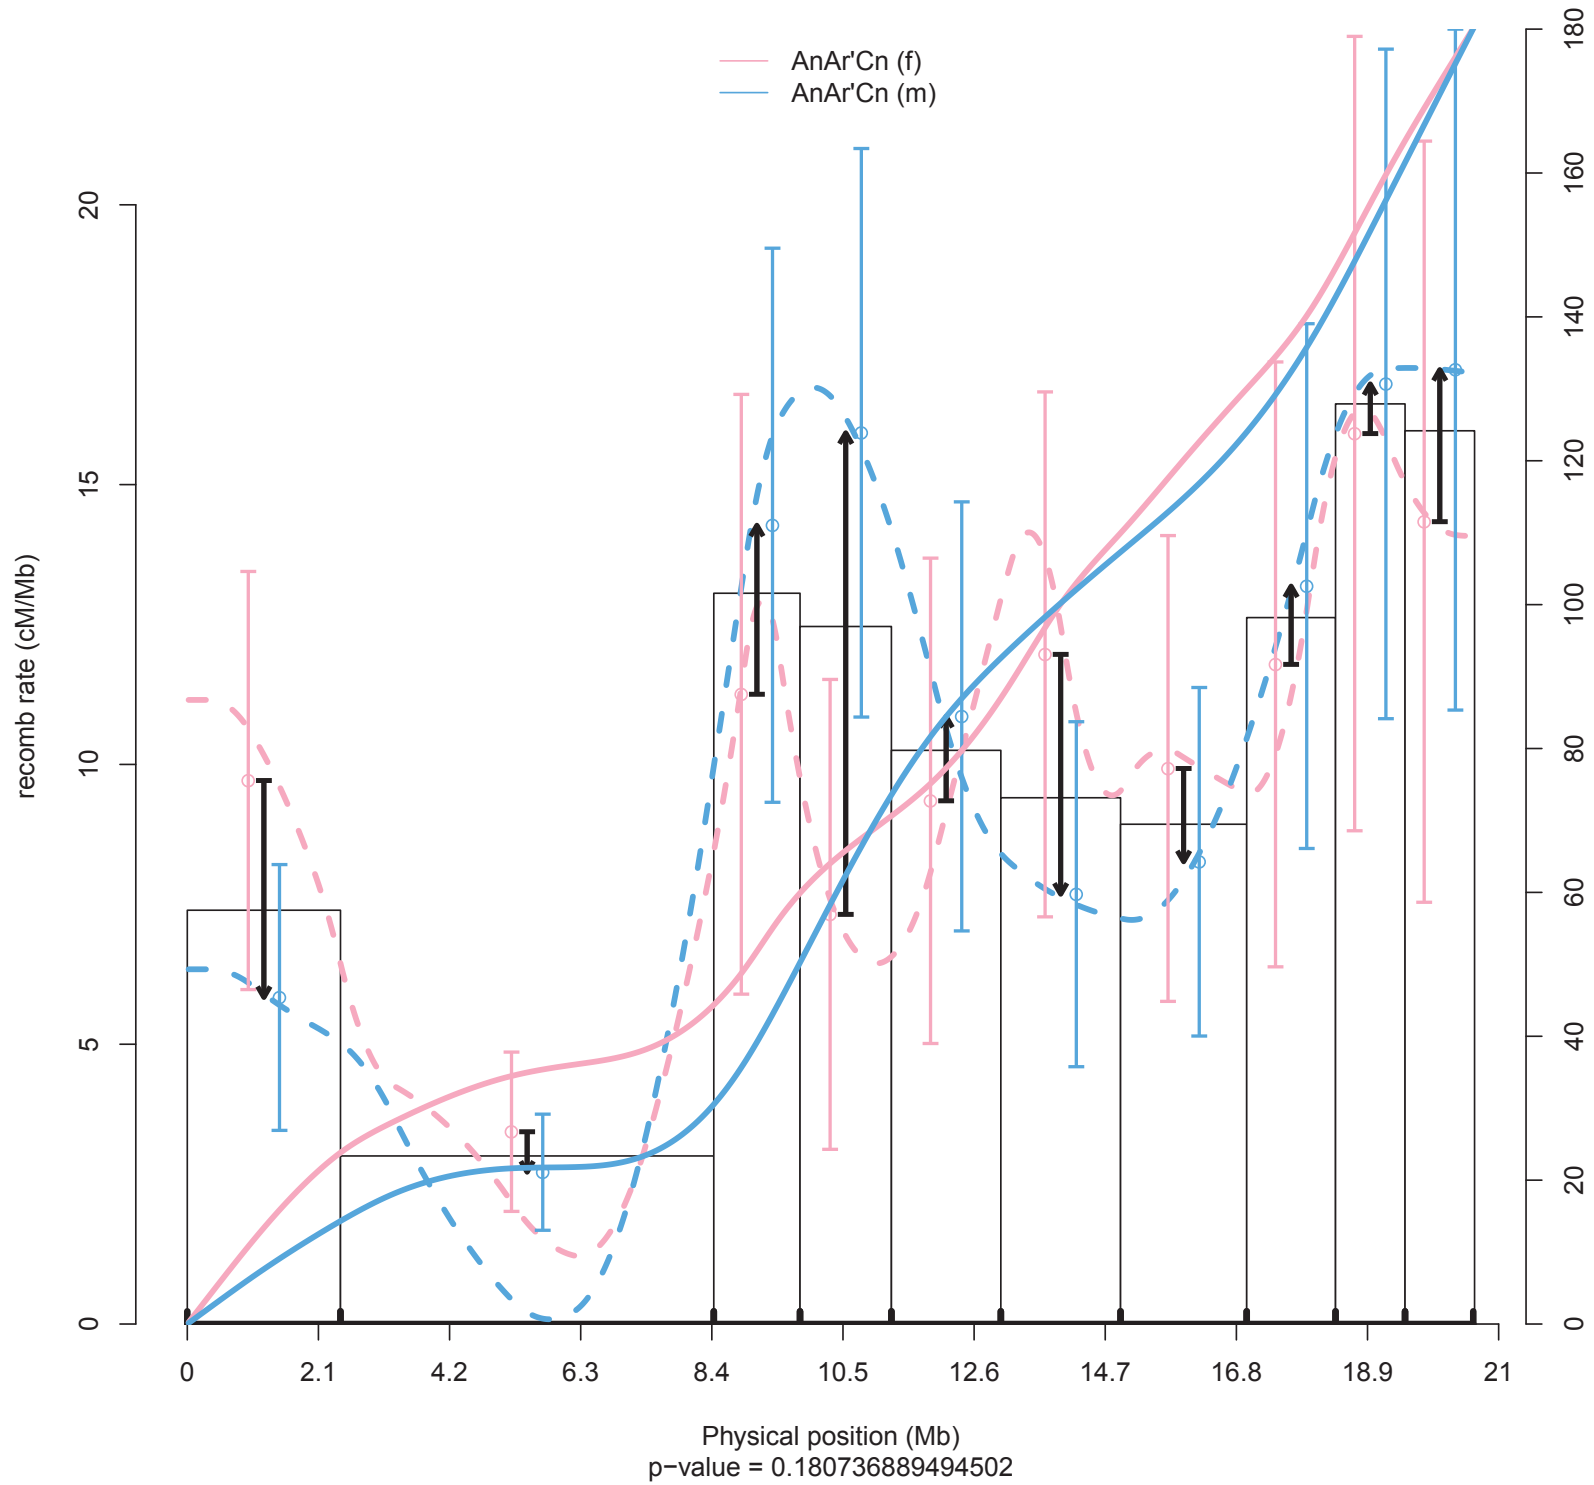

# AnAr'Cn (f) - AnAr'Cn (m) chr 9

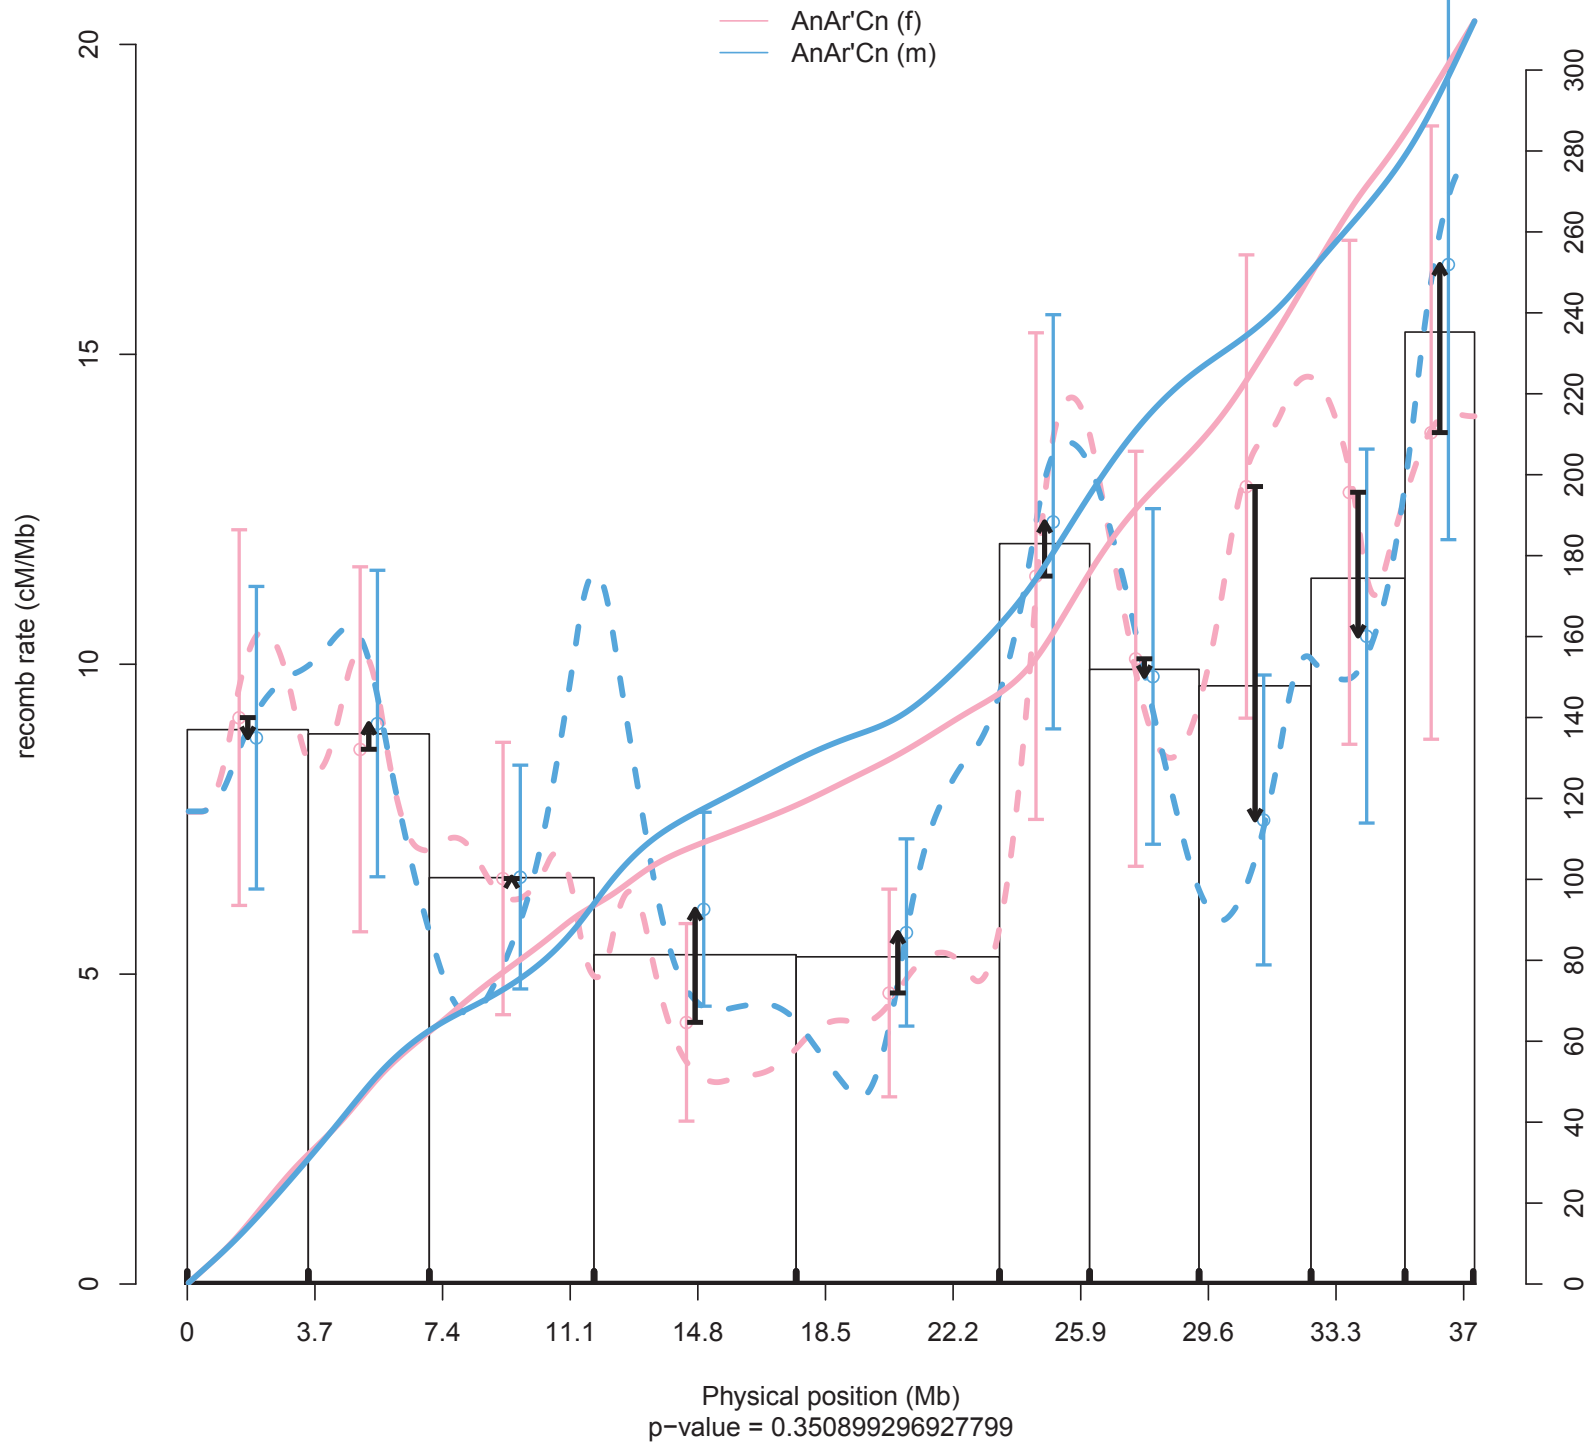

# AnAr'Cn (f) - AnAr'Cn (m) chr 10

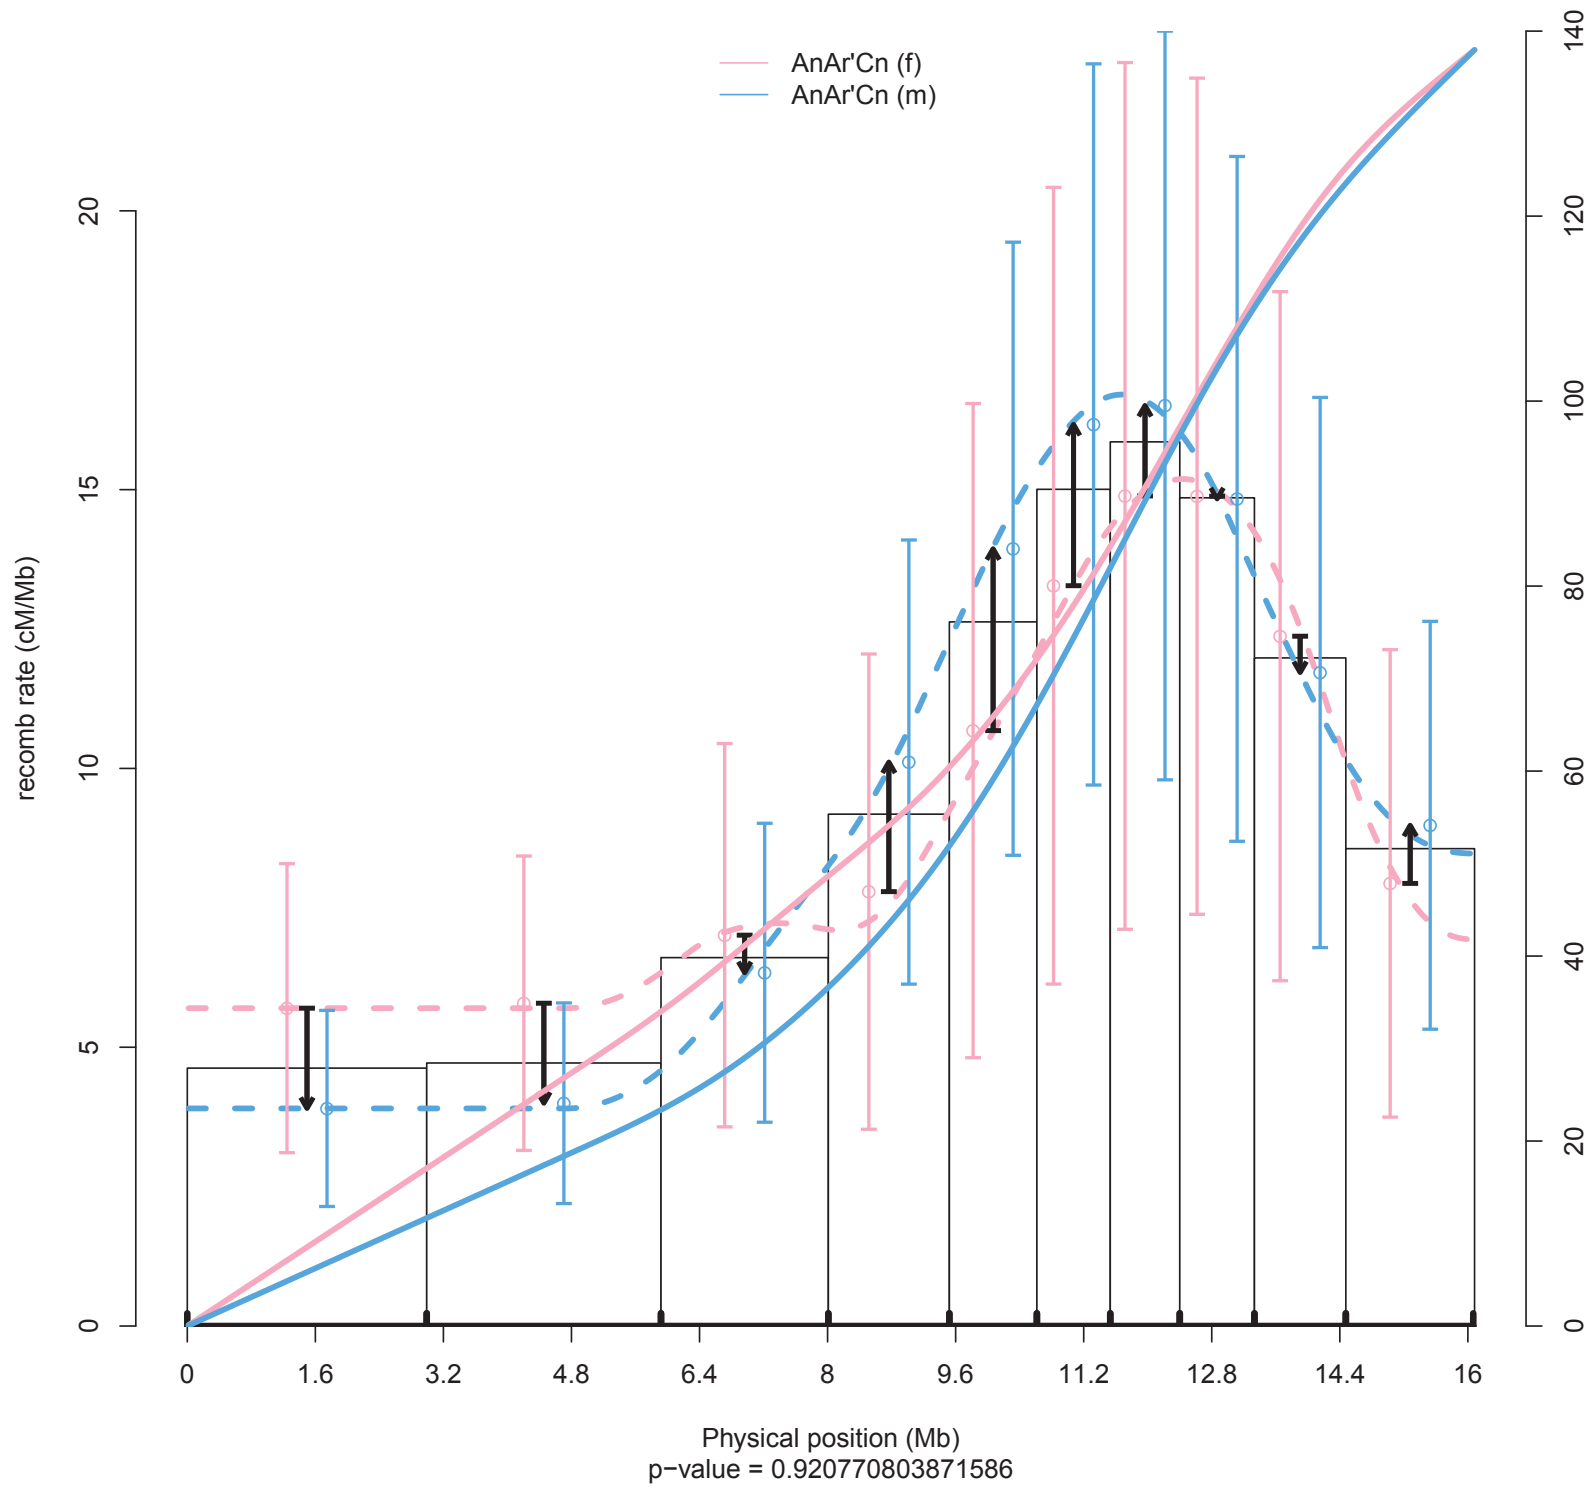

Supplement: pgen.1006794.s005.pdf [file pgen.1006794.s005.pdf]
