# Supplementary material for: Amplifying recombination genome-wide and reshaping crossover landscapes in Brassicas
Source: PubMed Central journal article supplement (PMC5444851; doi:10.1371/journal.pgen.1006794), 2017-05-11

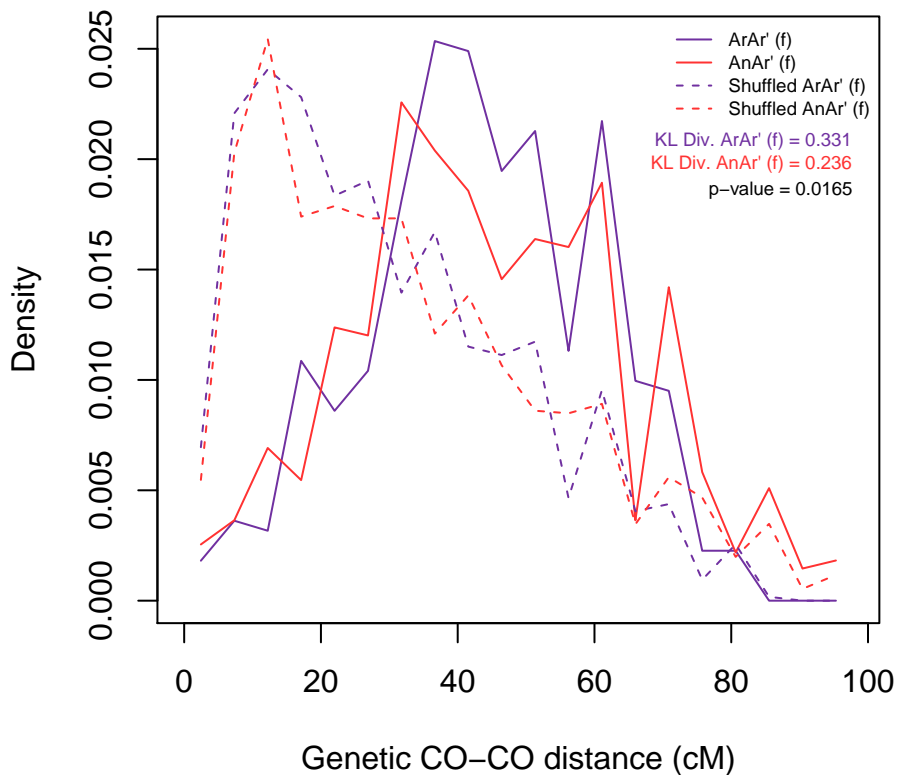

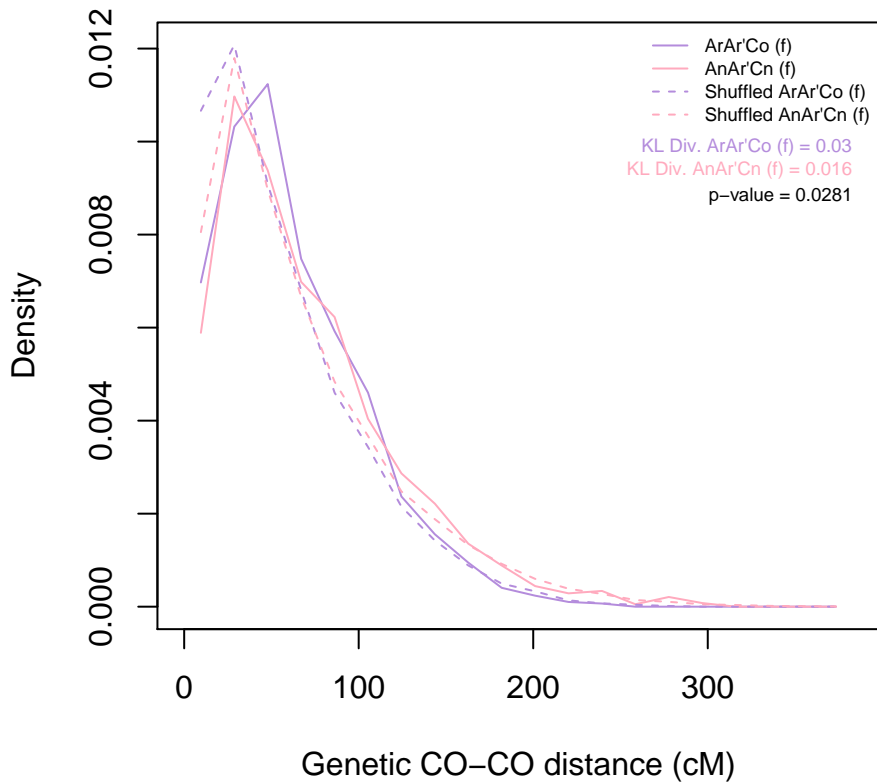

Supplement: pgen.1006794.s012.pdf [file pgen.1006794.s012.pdf]
