# Supplementary material for: Amplifying recombination genome-wide and reshaping crossover landscapes in Brassicas
Source: PLoS Genet. 2017 May 11;13(5):e1006794. doi: 10.1371/journal.pgen.1006794 (PMC5444851; doi:10.1371/journal.pgen.1006794)
Supplement: S15 Table — (XLSX) [file pgen.1006794.s028.xlsx]

## Sheet: S15 Table
S13 Table. Genotyping data for the samples deriving from the male AnAr'Cn F1 hybrid used for linkage analysis
SNP #	Sample 1	Sample 2	Sample 3	Sample 4	Sample 5	Sample 6	Sample 7	Sample 8	Sample 9	Sample 10	Sample 11	Sample 12	Sample 13	Sample 14	Sample 15	Sample 16	Sample 17	Sample 18	Sample 19	Sample 20	Sample 21	Sample 22	Sample 23	Sample 24	Sample 25	Sample 26	Sample 27	Sample 28	Sample 29	Sample 30	Sample 31	Sample 32	Sample 33	Sample 34	Sample 35	Sample 36	Sample 37	Sample 38	Sample 39	Sample 40	Sample 41	Sample 42	Sample 43	Sample 44	Sample 45	Sample 46	Sample 47	Sample 48	Sample 49
Bn-A01-p101094	H	A	A	H	H	A	A	H	H	H	H	A	H	H	A	H	H	H	A	H	A	A	H	A	H	H	A	A	H	H	A	A	H	A	H	H	A	H	A	H	A	H	H	A	A	A	H	A	A
Bn-A01-p1152369	H	A	A	H	H	A	H	H	H	H	H	A	H	H	A	H	H	H	A	H	A	A	H	A	H	H	A	A	H	H	A	A	H	A	H	H	A	H	A	H	A	H	H	A	A	A	H	A	A
Bn-A01-p2230371	H	H	A	H	H	A	H	H	H	A	H	A	H	A	A	H	A	H	A	A	H	H	H	A	H	H	A	A	H	H	A	A	A	H	H	H	A	H	A	H	A	H	A	H	A	A	H	A	A
Bn-A01-p2934166	H	H	A	H	H	A	A	H	H	A	A	A	H	A	A	H	A	H	A	A	H	H	H	A	A	H	H	A	A	A	A	A	A	A	H	H	A	H	A	H	A	H	A	H	A	A	H	A	A
Bn-A01-p4925004	H	H	A	H	H	A	A	H	A	A	A	A	H	A	A	H	A	H	A	A	H	H	H	A	A	H	H	H	A	A	H	A	A	A	H	H	A	H	H	H	A	H	H	H	A	H	H	A	A
Bn-A01-p5635471	H	H	A	H	H	A	A	H	A	A	A	A	H	A	A	H	A	H	A	A	H	H	H	A	A	H	H	H	A	A	H	A	A	A	H	H	A	H	H	H	A	H	H	H	A	H	H	A	A
Bn-A01-p6776950	H	H	A	A	H	A	A	H	A	A	A	A	A	A	A	H	A	H	A	A	H	A	A	A	A	H	H	H	A	A	H	A	A	A	H	H	A	H	H	H	A	H	H	H	A	H	H	A	A
Bn-A01-p7648929	H	H	A	A	H	A	A	H	A	A	A	A	A	A	A	H	A	H	A	A	H	A	A	A	A	H	H	H	A	A	H	A	A	A	H	H	A	H	H	H	A	H	H	H	A	H	H	A	A
Bn-A01-p9699152	H	H	A	A	H	A	A	H	A	A	A	A	A	A	A	H	H	H	H	A	H	H	A	A	A	H	H	H	A	A	H	A	A	A	H	A	A	H	H	H	A	H	H	H	H	A	H	A	A
Bn-A01-p10926129	H	A	A	A	H	A	A	H	A	A	A	A	A	A	A	H	H	H	H	A	H	H	H	A	A	H	H	H	A	A	H	A	A	A	H	A	A	H	A	H	A	H	H	H	H	A	H	A	A
Bn-A01-p12178646	H	H	A	A	H	A	A	H	A	A	H	A	A	A	A	H	A	A	H	A	H	H	H	A	A	A	H	H	A	A	H	A	A	A	H	A	A	H	A	H	A	H	H	H	H	A	H	H	A
Bn-A01-p14727717	H	H	A	A	H	A	A	H	A	A	A	A	A	A	A	H	A	A	H	A	H	H	H	A	A	A	H	H	A	A	H	A	A	A	H	A	A	H	A	H	A	H	H	A	H	A	H	A	A
Bn-C1-p26664038	H	H	A	A	H	A	A	H	A	A	A	A	A	A	A	H	A	A	H	A	H	H	H	A	A	A	H	H	A	A	H	A	A	A	H	A	A	H	A	H	A	H	H	A	H	A	H	H	A
Bn-A01-p18124795	H	H	A	A	H	A	A	H	A	A	A	A	A	A	A	H	A	A	H	A	H	H	H	A	A	A	H	H	A	A	H	A	A	A	H	A	A	H	A	H	A	A	H	A	H	H	A	H	A
Bn-A01-p19731678	H	H	A	A	H	A	A	H	A	A	A	A	A	A	A	H	A	A	H	A	H	H	A	A	A	A	H	H	A	A	H	A	A	H	H	A	A	A	A	H	A	A	H	A	H	H	A	H	H
Bn-A01-p20482459	H	H	A	A	H	A	A	H	A	A	A	A	A	H	A	H	A	A	H	A	H	H	A	A	A	A	A	H	A	A	H	A	A	H	H	A	A	A	A	H	A	A	H	A	A	H	A	H	H
Bn-A01-p21513096	H	H	A	A	H	A	A	H	A	A	A	A	A	H	A	A	A	A	H	A	A	H	A	A	A	A	H	A	H	A	H	A	A	H	H	A	A	A	A	H	H	A	H	A	A	H	A	H	H
Bn-A01-p23280094	H	H	A	A	H	A	A	A	A	A	A	H	H	H	A	A	A	A	H	H	A	H	H	A	A	A	H	A	H	A	A	A	A	H	H	A	A	A	A	H	H	A	H	A	A	H	A	H	H
Bn-A01-p24396906	H	H	A	A	A	A	A	A	A	A	A	H	H	H	A	A	A	A	H	H	A	H	H	A	A	A	H	H	H	A	A	A	A	H	H	A	A	A	A	H	H	A	H	A	A	H	A	H	H
Bn-A01-p27846544	H	H	A	A	A	H	A	A	A	A	A	H	H	H	A	A	A	A	H	H	A	H	H	H	H	A	H	H	H	A	H	H	A	H	A	A	A	A	A	H	H	A	H	A	A	A	A	H	H
Bn-A02-p1188292	A	H	H	H	A	A	H	A	H	A	A	H	H	A	H	A	A	H	A	A	A	A	H	A	A	H	A	A	H	H	H	H	A	A	A	H	H	H	A	A	A	H	H	A	A	H	A	A	H
Bn-A02-p5799113	A	H	H	H	A	A	H	A	H	A	H	H	H	A	A	H	A	H	H	A	A	H	H	A	H	H	A	A	H	H	H	H	A	A	A	H	H	H	A	A	A	A	H	H	A	H	A	H	H
Bn-A02-p6478309	A	H	H	H	A	H	H	A	H	A	H	H	H	A	A	H	A	H	H	A	A	H	H	A	H	H	A	A	H	H	A	H	A	A	A	H	H	H	A	A	A	A	H	H	A	H	A	H	H
Bn-A02-p7260946	A	H	H	H	A	H	H	A	H	A	H	A	H	A	A	H	A	H	H	A	A	H	H	A	H	H	A	A	H	H	A	H	A	A	A	H	H	A	A	A	A	A	H	H	A	H	A	H	H
Bn-A02-p8057234	A	H	H	H	A	H	H	A	H	A	H	A	H	A	H	H	A	A	H	H	A	A	H	A	H	H	A	A	H	H	A	H	A	A	A	H	H	A	A	H	A	A	H	H	H	H	A	H	H
Bn-A02-p9281731	A	H	H	H	A	H	H	A	H	A	H	A	H	A	H	H	A	A	H	H	A	A	H	A	H	H	A	A	H	A	A	H	A	A	A	H	H	A	A	H	A	H	H	H	H	H	A	H	H
Bn-A02-p10255955	A	H	H	H	A	H	H	A	H	A	H	A	H	A	H	H	A	A	H	H	A	A	H	H	H	H	A	A	H	A	A	H	A	A	A	H	A	A	A	H	A	H	A	H	H	H	A	H	H
Bn-A02-p11998921	A	H	H	H	A	A	H	A	H	A	H	A	H	A	H	H	A	A	A	H	H	A	H	A	H	H	A	A	H	A	A	H	A	A	A	H	A	A	A	H	A	H	H	H	H	A	A	H	H
Bn-A02-p13803383	A	A	H	H	A	A	H	A	H	A	H	A	H	A	H	H	A	A	A	H	H	A	H	A	H	H	A	H	H	A	A	H	A	A	A	H	A	A	A	H	A	H	H	H	H	A	A	H	H
Bn-A02-p14695760	A	A	H	H	A	A	H	A	H	A	H	A	H	A	H	H	A	A	A	H	H	A	A	A	H	H	A	H	H	A	A	H	A	A	A	H	A	A	A	H	A	H	H	H	H	A	A	H	H
Bn-A02-p15870327	H	A	H	H	A	A	H	A	H	H	A	A	H	A	H	H	A	A	H	H	H	A	A	A	H	H	A	H	H	A	A	H	A	A	A	A	A	A	H	H	A	H	H	H	H	A	A	H	H
Bn-A05-p9118240	H	A	H	H	A	A	H	A	H	H	A	A	H	A	H	H	H	A	H	H	H	A	A	A	H	H	A	H	H	A	A	H	A	A	A	A	A	A	H	A	A	H	H	A	H	A	H	H	H
Bn-A02-p19049506	H	A	H	H	H	A	H	H	H	H	A	A	H	A	H	H	H	A	H	H	H	A	A	A	H	H	A	H	A	A	A	H	A	A	A	A	A	A	H	A	A	H	H	A	H	A	H	H	H
Bn-A02-p19704677	H	A	H	H	H	A	H	H	H	H	A	A	H	A	H	H	H	A	H	H	A	A	A	A	H	H	A	H	A	A	A	H	A	H	A	A	A	A	H	A	A	H	H	A	H	A	H	H	H
Bn-A02-p20207870	H	A	H	H	H	A	H	H	H	H	A	A	H	A	H	H	A	A	A	H	A	A	A	A	A	H	A	H	A	A	A	H	H	H	A	A	A	A	H	A	A	H	H	A	H	H	H	H	H
Bn-A02-p22409779	H	A	H	H	H	A	A	H	H	H	A	A	H	A	H	H	A	A	A	H	A	A	A	A	A	H	A	H	A	A	A	H	H	H	A	A	A	A	H	A	A	H	H	A	H	H	H	H	H
Bn-A02-p23726200	A	A	H	H	H	A	A	H	H	H	A	A	A	A	H	H	A	A	A	H	A	A	A	H	A	A	A	H	A	H	A	H	H	H	A	A	A	H	A	H	A	H	A	A	H	H	H	H	H
Bn-A02-p24559792	A	A	H	H	H	A	A	H	H	H	A	A	A	A	H	H	A	A	A	H	A	H	A	H	A	A	A	H	A	H	A	H	H	H	A	A	A	H	A	H	A	H	A	A	H	H	H	H	H
Bn-A02-p25864051	A	A	H	H	H	A	A	H	H	H	A	H	A	A	H	A	A	A	A	H	A	H	A	H	A	A	A	H	A	H	A	H	H	H	A	A	A	H	A	H	A	H	A	A	H	H	H	A	H
Bn-A02-p26987864	A	A	H	H	H	H	A	H	H	H	A	H	H	A	H	A	A	A	A	H	A	H	A	H	A	A	A	H	A	A	A	H	H	H	A	A	A	H	A	H	A	H	A	A	H	A	H	A	H
Bn-A03-p835987	A	A	A	H	A	H	A	A	H	H	H	A	A	A	H	H	A	H	A	A	A	A	H	A	H	A	H	A	H	A	A	A	A	A	A	A	H	H	A	H	H	A	H	H	A	H	H	A	H
Bn-A03-p2074890	A	A	A	H	A	H	A	A	A	H	H	A	A	A	H	H	H	H	A	A	A	A	H	A	A	A	A	A	H	A	A	A	A	H	A	A	H	H	A	H	A	A	H	H	A	H	H	A	H
Bn-A03-p2948394	A	A	A	H	A	A	A	A	A	H	H	H	A	A	H	H	H	H	A	A	A	A	H	A	A	A	A	A	H	A	H	A	A	H	A	A	A	H	H	H	A	A	H	H	A	H	H	A	H
Bn-A03-p4352837	A	H	H	H	A	A	A	A	A	H	H	H	A	A	H	H	H	H	H	H	A	A	H	A	A	A	A	A	H	A	H	A	H	H	A	A	A	H	H	A	A	A	H	H	A	H	H	A	H
Bn-A03-p5160088	A	H	H	H	A	A	H	A	A	H	H	H	A	A	H	H	H	H	H	H	A	A	H	A	A	A	A	A	H	A	A	A	H	A	A	A	A	H	H	A	A	A	H	H	A	H	H	A	H
Bn-A03-p5903435	A	H	H	H	H	A	H	A	A	H	H	H	A	A	H	H	H	H	H	H	A	A	H	A	A	A	A	A	H	A	A	A	H	A	A	A	A	H	H	H	A	A	H	H	A	H	H	A	H
Bn-A03-p7159916	A	H	H	H	H	A	H	H	A	H	H	H	A	A	H	H	H	H	H	H	A	A	H	A	A	A	H	A	H	A	A	A	H	A	A	A	A	H	H	H	A	A	H	H	H	H	H	A	H
Bn-A03-p8032849	A	H	H	H	H	H	H	H	A	H	H	H	A	A	H	H	H	H	H	H	H	A	H	A	A	A	H	A	H	A	H	A	H	A	H	A	A	H	H	H	A	A	H	H	H	H	H	A	H
Bn-A03-p9246222	A	H	H	H	H	H	H	H	A	H	H	H	A	A	H	H	H	H	H	H	H	A	H	A	A	A	H	A	H	A	H	A	H	A	H	A	A	H	H	H	A	A	H	H	H	H	H	A	H
Bn-A03-p9847680	A	H	H	H	H	H	H	H	A	A	H	A	A	A	H	H	H	H	H	H	H	A	H	A	A	A	H	A	H	A	H	A	H	A	H	A	A	H	H	H	A	A	H	H	H	H	H	A	H
Bn-A03-p10930541	A	H	H	H	H	H	H	H	A	A	A	A	A	A	H	H	H	H	H	H	H	A	H	A	A	A	H	H	H	A	H	A	H	A	H	A	A	H	H	H	H	A	H	H	H	H	H	A	H
Bn-A03-p11704125	A	H	H	H	H	H	H	H	A	A	A	A	A	A	H	H	H	H	H	H	H	A	H	A	A	A	H	H	H	A	H	A	H	A	H	A	A	H	A	H	H	A	H	A	H	H	H	A	H
Bn-A03-p12935447	A	H	H	H	H	H	H	H	A	A	A	A	A	A	H	H	H	A	H	H	H	A	H	A	A	A	H	H	H	A	H	A	A	A	H	A	A	H	A	A	H	A	H	A	H	H	H	A	H
Bn-A03-p14175904	A	H	H	H	H	H	H	H	A	A	A	A	A	A	H	A	A	H	H	H	H	A	H	A	A	A	H	H	H	A	H	A	A	A	H	A	A	H	A	A	H	A	H	A	H	H	H	A	H
Bn-A03-p15404736	A	H	H	H	H	H	H	H	A	A	A	A	A	A	A	A	A	H	H	H	H	A	H	A	A	A	H	H	H	A	H	A	A	A	A	A	A	H	A	A	H	H	H	A	H	H	H	A	H
Bn-A03-p17217528	H	H	H	H	H	H	H	A	A	A	H	H	A	A	A	A	A	H	H	H	A	A	H	H	A	A	H	H	H	A	A	H	A	A	A	H	A	H	A	A	H	H	A	A	A	H	H	A	H
Bn-A03-p18183550	H	H	H	H	H	H	A	A	A	A	H	H	A	A	A	A	A	H	H	H	A	A	H	A	A	A	A	H	H	A	A	H	A	A	A	H	A	H	A	A	H	H	A	A	A	H	H	A	H
Bn-A03-p20000930	H	H	H	A	H	H	A	A	A	A	H	H	A	A	A	A	H	H	H	H	A	A	A	A	H	A	A	H	H	H	A	H	A	A	A	H	A	A	A	H	H	H	A	A	A	H	H	H	A
Bn-A03-p21292773	A	H	H	A	H	H	A	A	H	A	H	H	A	A	H	A	H	H	H	H	A	A	A	A	H	A	A	H	A	H	A	H	A	A	H	H	A	A	H	H	H	A	A	H	A	H	H	H	A
Bn-A03-p22313737	A	A	H	A	H	H	H	A	A	A	H	H	A	A	H	A	H	H	H	H	A	A	A	A	H	A	A	H	A	H	A	H	A	A	H	A	A	A	H	H	H	A	A	H	A	H	H	H	A
Bn-A03-p23077236	A	A	H	H	H	H	H	A	A	A	H	H	A	A	H	A	H	H	H	H	H	A	A	A	H	A	A	H	A	A	A	H	A	A	H	A	A	A	H	H	A	A	A	H	A	A	H	H	A
Bn-A03-p24032564	A	A	H	H	H	H	H	A	A	A	H	H	H	A	H	A	H	H	H	H	H	A	A	A	H	A	H	A	A	A	A	H	A	A	H	A	A	A	H	H	A	A	A	H	A	A	H	H	A
Bn-A03-p24906226	A	A	H	H	H	H	H	A	A	A	H	H	H	A	H	A	H	H	H	H	H	A	A	A	H	A	H	A	A	A	A	H	A	A	H	A	A	A	H	A	A	A	A	H	A	A	H	H	H
Bn-A03-p25765687	A	A	H	H	A	H	H	A	A	A	H	A	H	A	H	A	H	H	H	H	H	A	A	A	H	A	H	A	A	A	A	H	A	A	H	A	A	A	H	A	A	A	A	A	H	A	H	H	H
Bn-A03-p26839758	A	A	H	H	A	H	H	A	A	A	A	A	H	A	H	A	H	H	A	H	A	A	A	A	H	A	H	A	A	A	H	H	A	A	H	H	A	A	A	A	A	A	A	A	H	A	H	H	H
Bn-A03-p27607709	A	A	H	H	A	H	H	A	A	A	A	A	H	A	H	A	H	H	A	H	A	A	A	A	H	A	H	H	A	A	H	H	A	A	H	H	A	A	A	A	A	A	A	A	H	A	H	H	H
Bn-A03-p29565087	A	H	H	H	A	H	H	A	H	A	A	A	H	H	H	H	H	H	A	A	A	H	A	A	H	H	H	H	A	A	H	A	H	A	H	H	A	H	A	A	A	A	A	A	H	A	H	H	H
Bn-A03-p31535298	A	H	H	H	A	H	H	A	H	A	A	A	H	H	H	H	H	H	A	A	A	H	A	A	H	H	H	H	A	A	H	A	H	A	H	H	A	H	A	A	A	A	A	A	H	A	H	H	H
Bn-A04-p24368	H	A	H	A	A	A	H	H	H	A	A	H	H	A	A	A	A	A	A	H	A	A	H	A	H	A	A	A	A	H	A	H	A	A	H	A	A	A	H	H	A	H	H	A	H	A	A	A	H
Bn-A04-p1032336	H	A	H	A	A	A	H	H	H	A	H	H	H	A	A	A	A	A	A	H	A	H	H	A	H	A	A	A	A	H	A	H	A	A	H	A	A	A	H	H	A	H	H	A	H	A	A	A	H
Bn-A04-p1893968	A	A	H	A	A	A	H	H	H	A	H	A	H	A	A	A	A	A	A	A	A	H	A	A	A	A	A	A	A	A	A	A	A	A	H	H	A	H	A	A	A	H	H	A	A	A	A	A	H
Bn-A04-p2750401	A	A	H	A	A	A	H	H	H	A	H	A	H	H	A	A	A	A	A	A	A	H	A	A	A	A	A	A	A	A	A	A	A	A	H	H	A	H	A	A	A	A	H	A	A	A	A	A	H
Bn-A04-p3853621	A	A	A	A	A	A	H	A	H	A	H	A	H	H	A	A	H	H	A	A	A	H	A	A	A	A	A	A	H	A	A	A	H	A	H	H	H	H	A	A	A	A	H	A	A	A	A	A	H
Bn-A04-p4207198	A	A	A	H	A	A	H	A	H	A	H	A	H	H	A	A	H	H	A	A	A	H	A	A	A	A	H	A	H	A	A	A	H	A	H	H	H	H	A	A	A	A	H	A	A	A	A	A	H
Bn-A04-p4978478	A	A	A	H	A	A	H	A	H	A	H	A	H	H	A	A	H	H	A	A	A	H	A	A	A	A	H	A	H	A	A	A	H	H	H	H	H	H	A	A	A	A	H	A	A	H	A	A	A
Bn-A04-p6027878	A	A	H	H	A	A	H	A	H	A	H	A	H	H	A	A	H	H	A	A	A	H	A	A	A	A	H	A	H	A	A	A	H	H	H	H	H	H	A	A	A	A	H	A	A	H	H	A	A
Bn-A04-p6764233	A	A	H	H	A	A	H	A	H	A	H	A	H	H	A	A	H	H	A	A	H	H	A	A	A	A	H	A	H	A	A	A	H	H	H	H	H	H	A	A	A	A	H	A	A	H	H	A	A
Bn-A04-p8686934	A	A	H	H	A	A	A	A	A	A	H	A	H	H	A	A	H	H	A	A	H	H	A	A	A	A	H	A	H	A	A	A	H	H	H	H	H	H	A	A	A	A	A	A	A	H	H	A	A
Bn-A04-p9510223	A	A	H	H	A	A	A	A	A	A	H	A	H	A	A	A	H	H	A	A	H	H	A	A	H	A	H	H	H	A	A	A	H	H	H	H	H	H	A	H	A	A	A	A	A	H	H	A	A
Bn-A04-p10560896	H	A	H	H	A	A	A	A	A	A	H	A	H	A	A	A	H	A	A	A	H	H	A	A	H	A	H	H	H	A	A	A	H	H	H	H	A	H	A	H	A	A	A	H	A	H	H	A	H
Bn-A04-p11818085	H	A	H	A	A	A	A	A	A	A	H	A	H	A	A	H	H	A	A	A	H	H	A	A	H	A	H	H	H	A	A	A	H	H	A	H	A	H	H	H	A	A	A	H	H	H	H	A	H
Bn-A04-p13056296	H	A	H	A	A	A	A	A	A	A	H	A	H	A	A	H	H	A	A	H	H	H	A	A	H	A	A	H	H	A	A	A	H	H	A	H	A	H	H	H	A	A	A	H	H	H	H	A	H
Bn-A04-p14159558	H	A	H	A	A	A	A	A	A	A	H	A	H	H	A	H	A	A	A	H	H	H	A	A	H	A	A	H	H	A	A	A	H	H	A	H	A	H	H	H	A	A	A	H	H	H	H	A	H
Bn-A04-p15030899	H	A	H	A	A	A	H	A	A	A	H	A	H	H	A	H	A	A	A	H	H	H	A	A	A	A	H	H	H	A	A	A	H	H	A	H	A	H	H	H	A	A	A	H	H	H	H	A	H
Bn-A04-p15895339	H	A	H	A	A	A	H	A	A	A	H	A	H	H	A	H	A	H	A	H	H	H	A	A	A	A	H	H	H	A	A	A	H	A	A	H	A	H	H	H	H	A	H	H	H	H	H	A	H
Bn-A04-p17738097	H	A	A	A	H	H	H	A	H	A	H	A	H	H	A	H	A	H	A	H	H	H	H	A	A	A	H	H	H	A	A	A	H	A	A	H	A	H	H	H	H	A	H	H	H	H	H	A	H
Bn-A04-p18693211	H	A	A	A	H	H	H	A	H	A	H	A	H	H	A	H	A	H	H	H	A	H	H	A	A	A	H	H	H	A	A	A	H	A	A	H	A	H	H	H	H	A	H	H	H	H	H	A	H
Bn-A05-p377542	A	A	A	H	A	A	H	H	A	H	A	A	H	A	H	A	H	A	H	A	A	H	H	H	A	H	H	H	A	A	A	A	H	A	A	A	H	A	A	A	A	A	H	A	A	H	H	H	A
Bn-A05-p1671823	H	H	A	H	A	A	H	H	A	H	A	A	H	A	H	A	H	A	A	A	A	H	H	H	A	H	H	A	A	A	A	A	H	A	A	A	H	A	A	H	H	A	H	A	A	H	H	H	A
Bn-A05-p2726301	H	H	A	H	A	A	H	H	A	H	A	A	H	A	H	A	H	A	A	A	A	H	H	H	A	H	H	A	A	A	A	A	H	A	H	A	H	A	A	H	H	A	H	A	A	H	H	H	H
Bn-A05-p3989555	H	A	A	H	A	A	H	H	H	A	A	A	H	A	H	A	H	A	A	H	A	H	H	A	A	H	H	A	H	A	H	A	H	A	H	H	A	A	A	H	H	A	H	A	H	H	H	H	H
Bn-A05-p5057096	H	A	A	H	A	A	A	A	H	A	A	A	H	A	H	A	H	A	A	H	A	H	H	A	A	H	H	A	H	A	H	H	H	A	H	H	A	A	A	H	H	H	H	H	H	H	H	H	H
Bn-A05-p5670181	H	A	A	H	A	A	A	A	H	A	A	A	H	A	H	H	H	A	A	H	H	H	H	A	A	H	H	H	H	A	H	H	H	A	H	H	A	A	A	H	H	H	H	H	H	A	H	H	H
Bn-A05-p7222795	H	A	A	H	A	A	A	A	H	A	A	A	A	A	H	A	H	A	A	H	H	H	H	A	A	H	A	H	H	H	H	A	H	A	H	H	A	A	A	H	H	H	A	A	H	A	H	H	A
Bn-A05-p10103295	H	A	A	H	H	A	A	H	H	A	A	A	A	A	H	A	H	A	A	H	H	H	H	A	A	H	A	A	A	H	H	A	A	A	H	A	A	A	A	H	H	H	A	A	H	A	H	A	A
Bn-A05-p10214398	H	A	A	H	H	A	A	H	H	A	A	A	A	A	H	A	H	A	A	H	H	H	H	A	A	H	A	A	A	H	H	A	A	A	H	A	A	A	A	H	H	H	A	A	H	A	H	A	A
Bn-A05-p11226462	H	A	A	H	H	A	A	H	H	A	A	A	A	A	H	A	H	A	A	H	H	H	H	A	A	H	A	A	A	H	H	A	A	A	H	A	A	A	A	H	H	H	A	A	H	A	A	A	A
Bn-A05-p15016066	H	A	A	H	H	A	A	H	H	A	A	A	A	A	H	A	H	A	A	H	H	H	H	A	A	H	A	A	A	H	H	A	A	A	H	A	A	A	A	H	H	H	A	A	A	A	A	A	A
Bn-A05-p16224115	H	A	A	H	H	A	A	H	H	A	A	A	A	A	H	A	H	A	A	H	H	H	H	A	A	H	A	A	A	H	H	A	A	A	H	A	A	A	A	H	H	H	A	A	A	A	A	A	A
Bn-A05-p17243214	H	A	A	H	H	A	A	H	H	A	A	A	A	A	H	A	H	A	A	H	H	H	H	H	A	H	H	A	A	H	H	A	A	A	H	A	H	A	A	H	H	H	A	A	A	A	A	A	A
Bn-A05-p18161591	H	A	A	H	H	H	A	H	H	A	H	A	A	A	H	A	H	A	A	H	H	A	H	H	A	H	H	A	A	H	A	H	A	A	A	A	H	A	A	H	H	H	A	A	A	A	A	A	A
Bn-A05-p19650278	H	H	A	H	H	H	A	H	A	A	H	A	A	A	A	A	H	A	A	H	H	A	H	H	A	H	H	A	A	H	A	H	A	A	A	A	H	A	A	H	A	H	A	H	H	A	A	A	A
Bn-A05-p21193491	H	H	A	H	H	H	A	H	A	A	H	A	H	A	A	A	A	A	A	H	H	A	H	H	A	A	H	A	A	H	A	H	H	A	A	A	H	A	A	H	A	H	A	H	H	A	H	A	H
Bn-A05-p22265537	H	H	A	H	H	H	A	H	A	A	H	A	H	H	A	H	A	A	H	H	H	A	H	A	A	A	H	A	A	H	A	H	H	A	A	H	H	A	A	H	A	H	A	H	H	A	H	A	H
Bn-C5-p44450488	H	H	A	H	H	H	A	H	A	A	H	A	H	H	A	H	A	H	H	H	H	A	H	A	A	A	A	A	A	H	A	H	H	A	H	H	H	A	A	H	A	H	A	H	H	A	H	A	H
Bn-A05-p23838032	H	H	A	H	H	H	A	H	A	A	A	H	H	H	A	H	A	H	H	H	H	H	H	A	A	A	A	A	A	H	H	H	H	A	H	H	H	H	A	H	A	H	A	H	H	A	H	A	H
Bn-A06-p608554	A	A	A	A	H	H	H	A	A	H	A	H	A	A	A	A	A	A	A	A	H	H	A	A	H	H	A	A	A	H	A	H	H	H	A	H	A	H	A	A	H	H	H	H	A	H	A	H	A
Bn-A06-p1768254	A	A	A	A	H	H	H	A	A	H	A	A	A	A	A	A	A	A	A	A	H	H	A	A	H	H	H	A	A	H	A	H	H	H	A	H	A	H	A	A	H	H	A	H	A	H	H	H	A
Bn-A06-p2891290	A	A	A	H	H	H	H	A	A	H	A	A	A	A	A	A	A	A	A	A	A	H	A	A	A	H	H	H	A	H	A	H	H	H	A	H	A	H	A	A	H	A	A	H	A	H	H	H	A
Bn-A06-p4021930	A	A	A	H	A	H	H	A	A	H	A	A	A	A	A	A	H	A	A	A	A	H	A	A	A	H	H	H	A	H	A	A	H	H	A	H	A	H	A	A	H	A	A	H	H	H	H	H	A
Bn-A06-p5747694	A	A	H	H	A	A	H	H	A	H	A	A	H	A	A	A	H	A	A	H	A	H	H	A	A	H	H	H	A	H	H	A	H	H	H	H	A	H	A	A	H	A	H	H	H	H	A	H	A
Bn-A06-p6780542	A	A	H	A	A	A	H	H	A	H	A	A	H	A	H	A	H	A	A	A	A	H	H	A	A	H	H	H	A	H	H	A	A	A	H	H	A	H	A	A	H	H	H	A	H	H	A	H	A
Bn-A06-p7670615	A	A	H	A	A	A	H	A	A	H	A	A	H	A	H	H	H	A	A	A	A	A	H	A	A	H	A	H	A	H	H	A	A	A	H	H	A	A	A	A	H	A	H	A	H	A	A	H	A
Bn-A06-p9076011	A	A	H	H	A	A	H	A	H	H	H	A	H	A	H	H	A	A	A	A	A	A	H	A	A	A	A	A	A	H	H	A	A	A	H	H	A	A	A	A	H	A	A	A	H	A	A	H	A
Bn-A06-p10046691	A	A	H	H	A	A	H	H	H	H	H	A	H	A	H	H	A	A	H	A	A	A	H	A	H	A	A	A	A	H	A	A	H	A	A	H	A	A	A	A	H	A	A	A	H	A	A	H	A
Bn-A06-p12404563	A	A	H	H	A	A	H	H	H	H	H	A	H	A	H	H	A	A	H	A	A	A	H	A	H	A	A	A	A	H	A	A	H	A	A	H	A	A	A	A	H	A	A	A	H	A	A	H	H
Bn-A06-p19245025	A	A	H	H	A	A	H	H	H	H	H	A	H	A	H	H	A	A	H	A	A	A	H	A	H	A	A	A	A	H	A	A	H	A	A	H	A	A	A	A	A	A	A	A	H	A	A	H	H
Bn-A06-p14852091	A	A	H	H	H	A	H	H	H	H	H	A	H	A	H	H	A	A	H	A	A	A	A	A	A	A	A	H	A	H	A	A	H	A	A	H	A	A	A	A	A	A	A	A	H	A	A	H	H
Bn-A06-p16032028	A	A	H	H	H	A	H	H	H	H	H	A	H	A	H	H	A	A	H	A	A	A	A	A	A	A	H	H	A	H	A	A	H	A	A	H	A	H	A	A	A	H	A	A	H	A	H	H	H
Bn-A06-p16645035	A	A	H	H	H	A	H	A	H	H	H	A	H	A	H	H	A	A	H	A	A	A	A	A	A	A	H	A	H	H	A	A	H	A	A	H	A	H	H	A	A	H	A	A	H	A	H	H	H
Bn-A06-p18059678	A	A	H	H	H	A	A	A	H	H	H	A	H	A	H	H	A	A	H	A	A	A	A	A	H	A	H	A	H	H	A	A	H	A	H	H	A	H	H	A	A	H	A	A	H	A	H	H	A
Bn-A06-p21324859	A	A	A	A	H	A	A	A	H	H	A	A	H	A	H	H	A	A	A	A	A	A	H	A	H	A	H	A	H	H	A	A	H	A	H	H	A	H	A	A	A	H	A	A	H	A	H	H	A
Bn-A06-p22816078	A	A	A	A	H	H	A	A	H	H	A	A	H	H	H	H	A	A	A	H	H	A	H	A	H	A	H	A	H	H	A	A	H	H	H	H	A	H	A	A	H	H	A	A	H	A	H	A	A
Bn-A06-p24206556	H	A	A	A	H	A	A	A	A	H	A	H	H	H	H	H	A	A	A	H	H	A	H	H	H	A	H	A	H	A	A	A	A	A	H	H	A	H	A	A	H	H	A	A	H	A	H	A	A
Bn-A06-p25878721	H	A	A	A	H	A	A	H	A	H	A	H	H	H	A	H	H	A	A	H	A	A	A	H	A	A	H	A	H	A	H	A	A	A	H	H	A	A	A	A	H	H	A	A	H	H	H	H	A
Bn-A07-p186971	A	A	H	A	H	H	H	A	H	A	A	H	H	A	A	H	A	H	A	A	A	A	H	A	H	A	A	A	H	A	A	H	A	A	A	H	H	A	H	H	H	H	H	A	A	H	H	H	A
Bn-C7-p4580384	H	A	H	A	H	H	H	A	H	A	A	H	H	A	A	H	A	H	H	A	H	A	H	A	H	A	A	H	H	A	H	H	A	A	A	H	H	H	H	A	H	H	H	H	A	H	H	H	H
Bn-A10-p3044426	H	A	H	A	H	A	H	A	H	A	A	H	H	H	A	H	A	H	H	A	H	A	H	A	H	A	A	H	H	A	H	H	A	A	A	H	H	H	H	A	H	H	H	H	A	H	H	H	H
Bn-A07-p3202245	H	A	H	A	H	A	H	A	H	A	A	H	H	H	A	H	A	H	H	A	H	A	H	A	H	A	A	H	H	A	H	H	A	A	A	H	H	H	H	A	H	H	H	H	A	H	A	H	H
Bn-A07-p4151821	H	A	H	A	H	A	H	A	H	A	A	H	H	H	A	H	A	H	H	A	H	A	H	A	H	A	A	H	H	A	A	H	A	A	A	H	H	H	H	A	H	H	H	H	A	H	A	H	A
Bn-A07-p5039631	H	A	H	A	H	A	H	A	H	A	A	H	H	H	A	H	A	H	H	A	H	A	H	A	H	A	A	H	H	A	A	H	A	A	A	H	H	H	H	A	H	H	A	H	A	H	A	H	A
Bn-A07-p5877587	H	A	H	A	H	A	H	A	H	H	A	H	H	H	A	H	A	A	H	A	A	A	H	A	H	A	A	H	H	A	A	H	A	A	A	H	H	H	H	A	H	H	A	H	A	H	A	H	A
Bn-A07-p7039686	H	A	H	A	A	A	H	A	H	H	A	H	H	H	A	H	A	A	H	A	A	A	H	A	H	A	A	H	H	A	A	H	H	A	A	H	H	H	H	H	H	H	A	H	A	H	A	A	A
Bn-A07-p7677536	H	H	H	A	A	H	H	A	H	H	A	H	H	H	A	H	A	A	H	A	A	A	H	H	H	A	A	H	H	A	A	A	H	A	H	H	H	H	H	H	H	H	H	H	A	H	A	A	A
Bn-A07-p8618114	H	H	H	A	A	H	H	A	H	H	H	H	H	H	A	H	A	A	H	A	A	A	H	H	A	H	A	H	H	A	A	A	H	A	H	H	H	H	H	H	H	A	H	H	A	H	A	A	A
Bn-A07-p9468382	H	H	H	A	A	H	A	A	H	H	H	H	H	H	A	H	A	A	H	A	A	A	H	H	A	H	A	H	H	H	A	A	H	A	H	H	H	H	H	H	H	A	H	H	H	H	A	H	A
Bn-A07-p10409623	H	H	H	H	A	H	A	A	H	H	H	H	H	H	A	H	A	A	H	A	A	A	H	H	A	H	A	H	H	H	A	A	H	A	H	H	H	H	H	H	H	A	A	H	H	H	A	H	A
Bn-A02-p85725	H	H	H	H	A	H	A	A	H	A	H	H	H	H	A	A	A	A	H	A	A	A	H	A	A	H	A	H	H	H	H	A	H	A	H	H	H	H	H	H	A	A	A	H	H	H	A	H	A
Bn-A07-p11603894	H	H	H	H	A	H	A	A	H	A	H	H	H	A	A	A	A	A	H	A	A	A	A	A	A	H	A	H	H	H	H	A	H	A	H	A	H	H	A	H	A	A	A	H	H	H	A	H	A
Bn-A07-p12605125	H	H	H	H	H	H	H	A	H	A	H	A	H	A	A	A	A	A	H	A	A	A	A	A	A	H	A	H	H	H	H	A	H	A	H	A	H	H	A	H	A	A	A	H	H	H	A	H	A
Bn-A07-p13391724	H	H	H	H	H	H	H	A	H	A	H	A	H	A	A	A	A	A	H	H	A	A	A	A	A	H	A	A	H	H	H	A	H	A	H	H	H	A	A	H	A	A	A	H	H	A	A	H	A
Bn-A07-p14523096	H	H	H	A	H	H	H	A	H	A	H	A	A	A	A	A	A	H	H	H	A	A	A	A	A	H	A	A	H	H	H	A	A	A	H	H	H	A	A	H	A	A	A	H	H	A	A	H	A
Bn-A07-p15417895	A	H	H	A	A	H	H	A	A	A	H	A	A	A	A	A	H	H	H	H	A	A	A	A	A	H	A	A	H	H	H	A	A	A	H	H	H	H	A	H	A	A	A	H	H	A	A	H	A
Bn-A07-p16404722	A	H	A	A	A	H	H	A	A	H	H	A	A	A	A	A	H	H	H	H	A	A	A	A	A	A	A	A	H	H	H	A	A	A	H	H	H	H	A	H	H	A	H	H	H	A	A	H	A
Bn-A07-p17860745	A	H	A	A	A	H	H	A	A	H	A	A	A	A	A	H	H	H	A	H	A	A	A	A	A	A	A	A	H	H	H	A	A	H	H	H	H	H	H	H	H	A	H	A	H	H	A	H	A
Bn-A07-p19163856	A	H	A	A	A	H	H	A	A	H	A	A	A	A	A	H	H	H	A	H	A	A	H	A	A	A	A	A	H	H	H	A	H	H	H	A	H	H	H	H	H	A	H	A	H	H	A	H	H
Bn-A07-p20248654	A	H	A	A	A	H	A	A	A	H	A	A	A	H	A	H	H	H	A	H	A	A	H	A	A	A	A	A	H	H	H	A	H	H	A	A	H	H	H	H	H	A	A	A	H	H	A	H	H
Bn-A07-p21631043	A	H	H	A	A	H	A	A	A	H	A	A	A	H	A	H	H	H	A	H	A	H	H	A	A	A	H	H	H	H	H	A	H	H	A	A	H	A	H	H	H	A	A	A	H	H	A	H	H
Bn-A07-p22575730	A	H	H	A	A	H	A	A	A	H	A	A	A	H	A	H	H	H	A	H	A	H	H	A	A	A	H	H	H	H	H	A	H	H	A	A	H	A	H	H	H	A	A	A	H	H	A	H	H
Bn-A08-p350287	H	H	A	A	A	A	A	H	H	H	A	A	A	H	H	H	A	A	H	A	H	A	A	A	A	A	A	H	A	A	A	A	A	A	A	H	H	H	H	A	H	A	A	A	A	A	H	H	H
Bn-A08-p1022454	H	H	A	A	A	A	A	H	H	H	A	A	A	H	H	H	H	A	H	A	H	A	A	A	A	A	A	H	A	A	A	A	A	A	A	H	H	H	H	H	H	A	A	A	A	A	H	A	H
Bn-A08-p2425488	H	H	A	A	A	A	H	H	H	H	H	A	H	H	H	H	H	A	H	A	H	A	A	A	A	A	A	H	A	A	A	A	H	A	A	H	H	H	H	H	H	A	A	A	A	A	H	A	H
Bn-A08-p3284955	H	H	H	A	A	H	H	H	H	H	H	A	H	H	H	H	H	A	H	A	H	A	A	A	A	A	A	H	A	A	A	A	H	A	A	H	H	H	H	H	H	A	A	A	A	A	H	A	H
Bn-A08-p4255458	H	H	H	A	A	H	H	A	H	H	H	A	H	H	H	H	H	A	H	A	H	A	A	A	A	A	A	H	A	A	A	A	H	A	A	H	H	H	H	H	H	A	A	A	A	A	H	A	H
Bn-A08-p5174518	H	H	H	A	A	H	H	A	H	H	H	A	H	H	H	H	H	A	H	A	H	A	A	A	A	A	A	H	A	A	A	A	H	A	A	H	H	H	H	H	H	A	A	A	A	A	H	A	H
Bn-A08-p7318043	H	H	H	A	A	H	H	A	H	H	H	A	H	H	H	H	H	A	H	A	H	A	A	A	A	A	A	H	A	A	A	A	H	A	A	H	H	H	H	H	H	A	A	A	A	A	H	A	H
Bn-A08-p8869180	A	H	H	A	H	H	H	A	A	H	H	A	H	H	H	H	H	A	H	A	H	A	A	A	A	A	A	H	H	A	A	A	H	A	A	H	H	H	H	H	H	A	H	A	A	A	H	A	H
Bn-A08-p10270998	A	H	H	A	H	H	H	A	A	H	H	A	H	H	H	H	H	A	H	A	H	A	A	A	A	A	H	H	H	H	A	A	H	A	A	H	H	A	H	H	H	A	A	A	A	H	H	A	H
Bn-A08-p12761022	A	A	H	A	H	H	H	A	A	A	H	H	H	H	H	H	H	A	H	A	H	A	A	H	A	A	H	A	H	H	A	H	H	A	A	H	H	A	H	A	H	A	A	H	H	H	H	A	A
Bn-A08-p13953904	A	A	H	A	H	H	H	A	A	A	H	H	H	H	H	H	A	A	H	A	H	A	H	H	A	A	H	A	H	H	A	H	H	A	A	H	H	A	H	A	H	A	A	H	H	H	H	A	H
Bn-A08-p14790412	A	A	H	A	H	H	H	A	A	A	H	H	H	H	H	H	A	A	H	A	A	A	H	H	A	A	H	A	H	H	A	H	H	A	A	H	H	H	H	A	H	A	A	H	A	H	H	A	H
Bn-A08-p15804301	A	A	H	A	H	H	H	H	A	A	H	H	A	H	H	H	A	A	H	A	A	H	H	H	A	A	H	A	H	H	A	H	H	A	A	H	H	H	H	A	H	A	A	H	A	H	H	A	H
Bn-A08-p16644519	A	A	H	A	H	H	H	A	A	A	H	H	A	H	H	H	A	H	H	A	H	H	H	H	A	A	H	A	H	H	A	H	H	A	A	H	H	H	H	A	H	A	A	H	A	H	H	A	H
Bn-A08-p17710867	A	A	H	A	H	H	H	A	A	A	H	H	A	H	H	H	A	H	H	A	H	H	H	H	A	A	H	A	H	H	A	H	H	A	A	H	H	H	H	A	H	A	A	H	A	H	A	H	H
Bn-A08-p18784592	A	A	H	A	H	H	H	A	A	A	H	H	A	H	H	H	A	H	H	A	H	H	H	H	A	A	H	A	H	A	A	H	H	A	A	H	H	H	A	H	H	A	A	H	A	H	A	H	H
Bn-A08-p20014208	H	A	H	H	H	H	H	A	A	A	A	H	H	H	H	H	H	H	H	A	H	A	H	H	A	A	A	A	H	A	A	H	H	A	A	A	H	H	A	H	H	A	H	H	A	A	A	H	H
Bn-A08-p21383689	H	A	H	H	H	H	A	A	A	A	A	A	H	H	H	H	H	H	H	H	H	A	H	H	A	A	A	A	H	A	A	A	A	H	H	A	H	H	A	H	A	A	H	H	H	A	A	H	H
Bn-A09-p757653	H	A	H	H	H	H	A	A	A	H	A	H	H	H	A	A	H	H	H	A	H	A	A	A	A	A	H	H	A	H	A	A	H	A	H	A	A	H	H	H	A	H	A	A	H	A	H	H	A
Bn-A01-p26921219	H	A	H	H	H	H	A	A	A	H	A	H	H	H	H	A	H	A	H	A	H	A	A	A	A	A	H	H	A	A	A	A	H	A	H	A	A	H	H	H	A	H	A	A	H	A	H	H	A
Bn-A01-p9129693	H	A	H	H	H	H	A	A	A	H	A	H	H	H	H	A	H	A	H	A	H	H	H	H	A	A	H	H	A	A	A	H	H	A	H	H	A	H	H	H	A	H	A	A	H	A	H	A	A
Bn-A09-p4384911	H	A	H	H	H	H	A	A	A	A	A	H	H	H	A	A	H	A	H	A	H	H	H	H	A	A	H	H	A	A	A	H	H	H	H	H	A	H	H	H	A	H	A	A	H	A	H	A	A
Bn-A09-p5246229	H	A	H	H	H	H	A	A	A	A	A	H	H	H	A	A	H	A	H	A	H	H	H	H	A	A	A	H	A	A	A	H	H	H	H	H	A	H	H	H	A	H	A	H	H	A	H	A	A
Bn-C9-p10592230	H	H	H	H	H	H	A	H	A	A	A	H	H	A	A	H	H	A	H	A	H	H	H	A	A	A	A	H	A	A	A	H	H	H	H	H	A	A	H	H	A	H	A	H	H	A	H	A	A
Bn-A09-p8239411	H	H	H	H	H	H	A	H	A	A	A	H	H	A	A	H	H	A	H	A	H	H	A	A	A	A	A	H	A	A	A	H	H	H	H	H	A	A	H	H	A	H	A	H	A	A	H	A	A
Bn-A09-p10019827	H	H	H	H	H	A	A	H	A	A	A	H	H	A	A	H	H	A	H	A	H	H	A	A	A	A	H	H	A	A	A	H	A	H	H	H	A	A	H	H	A	H	H	H	A	A	A	A	A
Bn-A09-p13827633	H	H	H	H	H	A	A	H	A	A	A	H	H	A	A	H	H	A	H	A	H	H	A	A	A	A	H	H	A	A	A	H	A	H	A	H	A	A	H	H	A	H	H	H	A	A	A	A	A
Bn-A09-p16818644	H	H	H	H	H	A	A	H	A	A	A	H	H	A	A	H	H	H	H	A	H	H	A	A	A	A	H	H	H	A	A	H	A	H	A	H	A	A	H	H	H	A	H	A	A	A	A	H	A
Bn-A09-p15648941	H	H	H	H	H	A	A	H	A	A	A	H	H	A	A	H	H	H	H	A	H	H	A	A	A	A	H	H	H	A	A	H	A	H	A	H	A	A	H	H	H	A	H	A	A	A	A	H	A
Bn-A09-p17511656	H	A	A	H	H	A	A	H	H	A	A	A	H	A	A	A	H	H	H	A	H	H	A	A	A	A	H	A	H	A	H	H	A	H	A	H	A	H	H	H	H	A	H	A	A	A	A	H	A
Bn-A09-p19188090	H	A	A	H	H	A	A	H	H	A	A	A	H	A	A	A	H	H	H	A	H	H	A	A	A	A	H	A	H	A	H	H	A	H	A	H	A	H	H	H	H	A	H	A	A	A	A	H	H
Bn-A09-p20649745	H	A	A	H	H	A	A	H	H	A	A	A	H	A	A	A	H	H	H	A	H	H	A	A	A	A	H	A	H	A	H	H	A	H	A	H	A	H	H	A	H	A	H	A	A	A	A	H	H
Bn-A09-p23331135	H	A	H	H	H	A	A	H	A	A	A	H	H	A	A	A	A	H	H	A	A	H	A	A	A	A	H	A	A	A	A	H	A	A	A	H	A	H	H	A	A	A	A	A	A	A	H	H	A
Bn-A09-p23994818	H	A	H	H	H	A	A	H	A	A	A	H	H	A	A	A	A	H	H	A	A	H	A	A	H	A	H	A	A	A	A	H	H	A	A	H	A	H	H	A	A	A	A	A	A	A	H	H	A
Bn-A09-p24938986	H	A	H	H	H	A	A	H	A	A	A	H	H	A	A	A	A	H	H	A	A	A	A	A	H	A	H	A	A	A	A	A	H	H	A	H	A	H	A	A	A	A	H	A	A	H	H	A	A
Bn-A09-p25980030	H	H	H	H	H	A	A	H	H	A	A	H	H	A	A	H	A	H	H	A	A	A	A	A	H	H	H	A	A	A	A	A	H	H	A	H	A	A	A	H	A	A	H	A	A	H	H	A	A
Bn-A09-p27351047	H	A	A	H	H	A	A	H	H	A	H	H	H	H	A	H	A	H	A	A	A	A	A	A	H	H	H	H	A	A	A	A	H	H	A	H	A	A	A	H	A	A	H	A	H	H	H	A	A
Bn-A09-p28602135	H	A	A	H	H	A	A	H	H	A	H	H	A	H	A	H	A	H	A	A	A	A	A	A	H	H	H	H	A	A	A	A	H	H	A	H	A	A	A	H	A	A	H	A	H	H	H	A	A
Bn-A09-p30278622	A	A	A	H	H	A	A	H	H	A	H	H	A	H	H	H	A	H	A	A	A	H	A	A	H	H	H	H	A	A	A	A	H	H	H	H	A	A	A	H	A	A	H	A	H	H	H	A	A
Bn-A09-p31050548	A	A	A	H	H	A	H	H	H	A	H	H	A	H	H	H	A	H	A	A	A	H	A	A	H	H	H	H	A	A	A	A	H	H	H	H	A	A	A	H	A	A	H	A	H	H	H	A	A
Bn-A09-p32269283	A	A	A	H	H	A	H	H	H	A	H	H	A	H	H	H	A	H	A	A	A	H	A	A	H	H	H	H	H	A	A	A	H	H	A	H	A	A	H	H	A	A	H	A	H	H	H	A	A
Bn-A09-p32862905	A	A	A	H	A	A	H	H	H	A	H	H	A	H	H	H	A	H	A	A	A	H	A	A	H	H	H	H	H	A	A	A	H	H	A	H	A	A	H	H	A	A	H	A	H	H	H	H	H
Bn-A09-p33853604	A	A	A	H	A	A	H	H	A	A	H	H	H	H	H	H	A	A	H	A	H	H	A	A	H	A	H	H	H	A	H	A	H	H	A	H	A	A	H	H	A	A	H	A	H	H	H	H	H
Bn-A09-p35559972	A	A	A	H	A	A	A	H	A	A	H	H	H	H	H	H	A	A	H	A	H	H	A	A	A	A	A	H	A	A	H	H	A	H	A	H	A	A	H	H	A	A	A	A	H	H	H	H	H
Bn-A01-p18870174	H	A	A	A	H	H	H	A	H	H	A	A	H	A	A	A	H	H	A	A	H	H	A	H	H	A	A	A	H	H	A	H	H	H	H	H	A	A	H	H	H	H	A	H	H	A	H	A	H
Bn-A10-p6162838	H	A	H	A	H	H	H	A	A	H	A	A	H	A	A	A	H	H	A	A	H	H	A	H	H	A	A	A	H	H	A	H	H	H	H	H	A	A	H	H	H	H	A	H	H	A	H	A	H
Bn-A10-p6761330	H	A	H	A	H	H	H	A	A	H	A	A	H	H	A	H	H	H	A	A	H	H	A	H	H	A	A	A	H	H	A	H	H	H	H	H	A	A	H	H	H	H	A	H	H	A	H	A	H
Bn-A10-p8036658	H	A	H	A	H	A	H	A	A	H	A	A	H	H	A	H	H	H	A	A	H	H	H	H	H	A	A	A	A	H	A	H	H	H	H	H	A	A	H	H	H	H	A	H	H	A	H	A	H
Bn-A10-p9128660	H	A	A	H	H	A	H	A	A	H	A	A	H	H	A	H	H	H	A	H	H	H	H	H	H	A	A	A	A	H	A	H	H	A	H	H	A	A	H	A	H	H	A	H	H	H	H	A	H
Bn-A10-p9877760	H	A	A	H	A	A	H	A	A	H	A	A	H	H	A	H	H	H	A	H	H	H	H	H	H	A	A	A	A	H	A	H	H	A	H	H	A	A	H	A	H	H	A	H	A	H	H	A	H
Bn-A10-p11138874	A	A	A	H	A	A	A	A	A	H	A	H	A	H	A	A	H	H	A	A	H	H	H	H	H	A	A	A	H	H	A	H	H	A	H	H	A	A	H	A	H	A	H	H	A	H	H	A	H
Bn-A10-p13455391	A	A	A	H	A	A	A	A	A	H	A	H	A	H	A	A	H	H	A	A	H	H	H	H	A	A	A	A	H	H	A	A	H	A	H	H	A	A	H	A	A	A	H	H	A	H	H	H	H
Bn-A10-p14198466	A	A	A	A	A	A	A	A	A	H	H	H	A	A	A	A	H	A	A	A	H	H	H	A	A	A	A	H	H	H	A	A	H	A	A	H	A	H	H	A	A	A	H	H	H	H	H	H	H
Bn-A10-p16102918	A	A	A	A	A	A	A	A	A	H	H	A	A	A	A	A	H	A	A	A	H	H	H	A	A	A	A	H	H	A	A	A	H	A	A	H	A	H	H	A	A	A	H	A	H	H	H	H	H
Bn-A10-p17273374	A	A	A	A	A	A	A	A	A	A	A	A	A	A	A	A	H	A	A	A	H	A	H	A	H	A	A	H	H	A	H	A	H	A	A	A	A	A	H	A	A	A	H	A	H	H	H	H	H
[truncated: 113 more columns]
